# Supplementary material for: Comparative profiling of serum, urine, and feces bile acids in humans, rats, and mice
Source: PubMed Central journal article supplement (PMC11130135; doi:10.1038/s42003-024-06321-3), 2024-05-27
Supplement: 42003_2024_6321_MOESM1_ESM.pdf [file 42003_2024_6321_MOESM1_ESM.pdf]

# **Comparative Profiling of Serum, Urine, and Feces Bile Acids in Humans, Rats, and Mice**

Dan Zheng<sup>1</sup>, Kun Ge<sup>1</sup>, Chun Qu<sup>1</sup>, Tao Sun<sup>1</sup>, Jieyi Wang<sup>1</sup>, Wei Jia<sup>2</sup>, Aihua Zhao<sup>1\*</sup>

<sup>1</sup> Center for Translational Medicine, Shanghai Key Laboratory of Diabetes Mellitus and Shanghai Key Laboratory of Sleep Disordered Breathing, Shanghai Sixth People's Hospital Affiliated to Shanghai Jiao Tong University School of Medicine, Shanghai 200233, China

<sup>2</sup> Department of Pharmacology and Pharmacy, University of Hong Kong, Hong Kong, China

## Correspondence

Aihua Zhao, Center for Translational Medicine, Shanghai Key Laboratory of Diabetes Mellitus and Shanghai Key Laboratory of Sleep Disordered Breathing, Shanghai Sixth People's Hospital Affiliated to Shanghai Jiao Tong University School of Medicine, Shanghai 200233, China

Email: zhah@sjtu.edu.cn

The following Supplementary Material is available for this paper.

1. Supplementary Tables 1-14 (available in this file)
2. Supplementary Figures 1-2 (available in this file)

**Supplementary Table 1 Bile acids abbreviation**

| abbreviation   | full name                       | abbreviation     | full name                            |
|----------------|---------------------------------|------------------|--------------------------------------|
| CA             | cholic acid                     | GCDCA            | glycochenodeoxycholic acid           |
| CDCA           | chenodeoxycholic acid           | TCDCa            | taurochendeoxycholic acid            |
| $\alpha$ -MCA  | $\alpha$ -muricholic acid       | T- $\alpha$ -MCA | tauro $\alpha$ -muricholic acid      |
| $\beta$ -MCA   | $\beta$ -muricholic acid        | T- $\beta$ -MCA  | tauro $\beta$ -muricholic acid       |
| HCA            | $\lambda$ -muricholic acid      | GHCA             | glyco $\lambda$ -muricholic acid     |
| HDCA           | hyodeoxycholic acid             | GHDCA            | glycohyodeoxycholic acid             |
| UDCA           | ursodeoxycholic acid            | THCA             | tauro $\lambda$ -muricholic acid     |
| LCA            | lithocholic acid                | THDCA            | taurohyodeoxycholic acid             |
| 7-ketoLCA      | 7-keto lithocholic acid         | GUDCA            | glycoursodeoxycholic acid            |
| 12-ketoLCA     | 12-keto lithocholic acid        | TUDCA            | taoursodeoxycholic acid              |
| DCA            | deoxycholic acid                | GLCA             | glycolithocholic acid                |
| 23-norDCA      | 23-nordeoxycholic acid          | TLCA             | taulithocholic acid                  |
| 7-ketoDCA      | 7-keto deoxycholic acid         | GDCA             | glycodeoxycholic acid                |
| 3-ketoDCA      | 3-keto deoxycholic acid         | TDCA             | taurodeoxycholic acid                |
| dehydro-LCA    | dehydro-lithocholic acid        | T- $\omega$ -MCA | tauro $\omega$ -muricholic acid      |
| allo-LCA       | allolithocholic acid            | GDHCA            | glycodehydrocholic acid              |
| iso-LCA        | isolithocholic acid             | TDHCA            | taurodehydrocholic acid              |
| 6-ketoLCA      | 6-keto lithocholic acid         | CA-3S            | cholic acid 3-sulfate                |
| $\beta$ -HDCA  | 3 $\beta$ -hyodeoxycholic acid  | CDCA-3S          | chenodeoxycholic acid 3-sulfate      |
| $\beta$ -UDCA  | 3 $\beta$ -ursodeoxycholic acid | UDCA-3S          | ursodeoxycholic acid 3-sulfate       |
| 7,12-diketoLCA | 7,12-diketo lithocholic acid    | LCA-3S           | lithocholic acid 3-sulfate           |
| 6,7-diketoLCA  | 6,7-diketo lithocholic acid     | DCA-3S           | deoxycholic acid 3-sulfate           |
| 12-ketoCDCA    | 12-keto chenodeoxycholic acid   | GCA-3S           | glycocholic acid 3-sulfate           |
| $\omega$ -MCA  | $\omega$ -muricholic acid       | TCA-3S           | taurocholic acid 3-sulfate           |
| $\beta$ -CA    | 3 $\beta$ -cholic acid          | GCDCA-3S         | glycochenodeoxycholic acid 3-sulfate |
| iso-DCA        | isodeoxycholic acid             | TCDCa-3S         | taurochendeoxycholic acid 3-sulfate  |
| apoCA          | apocholic acid                  | GUDCA-3S         | glycoursodeoxycholic acid 3-sulfate  |
| muroCA         | murocholic acid                 | TUDCA-3S         | taoursodeoxycholic acid 3-sulfate    |
| DHCA           | dehydrocholic acid              | GLCA-3S          | glycolithocholic acid 3-sulfate      |
| UCA            | ursocholic acid                 | TLCA-3S          | taulithocholic acid 3-sulfate        |
| ACA            | allocholic acid                 | GDCA-3S          | glycodeoxycholic acid 3-sulfate      |
| GCA            | glycocholic acid                | TDCA-3S          | taurodeoxycholic acid 3-sulfate      |
| TCA            | taurocholic acid                |                  |                                      |

**Supplementary Table 2 Serum bile acid concentrations in humans, rats and mice (nmol/L)**

|               | humans          | rats            | mice            | humans vs rats<br>( <i>p</i> ) | humans vs mice<br>( <i>p</i> ) | rats vs mice<br>( <i>p</i> ) | humans vs rats vs mice<br>( <i>p</i> ) |
|---------------|-----------------|-----------------|-----------------|--------------------------------|--------------------------------|------------------------------|----------------------------------------|
| CA            | 117.71±111.46   | 5488.67±1945.20 | 274.26±202.19   | < 0.01                         | < 0.01                         | < 0.01                       | < 0.01                                 |
| CDCA          | 390.60±328.28   | 2159.39±1251.77 | 78.77±28.14     | < 0.01                         | < 0.01                         | < 0.01                       | < 0.01                                 |
| α-MCA         | 7.22±1.67       | 1747.96±1019.35 | 21.26±12.90     | < 0.01                         | < 0.01                         | < 0.01                       | < 0.01                                 |
| β-MCA         | N.D.            | 1271.33±742.23  | 317.56±178.88   |                                |                                | < 0.01                       | < 0.01                                 |
| HCA           | 16.72±13.82     | 147.17±72.42    | 22.07±35.31     | < 0.01                         | > 0.05                         | < 0.01                       | < 0.01                                 |
| HDCA          | 8.19±7.09       | 2841.21±1478.57 | 41.55±25.29     | < 0.01                         | < 0.01                         | < 0.01                       | < 0.01                                 |
| UDCA          | 137.36±123.42   | 297.29±191.36   | 70.18±36.02     | < 0.01                         | < 0.05                         | < 0.01                       | < 0.01                                 |
| LCA           | 20.06±13.97     | 22.72±16.24     | 14.39±5.65      | > 0.05                         | > 0.05                         | > 0.05                       | > 0.05                                 |
| 7-ketoLCA     | 7.92±12.54      | 86.90±78.76     | 5.85±3.33       | < 0.01                         | > 0.05                         | < 0.01                       | < 0.01                                 |
| 12-ketoLCA    | 14.44±11.4      | 6.48±1.10       | 7.04±1.83       | < 0.01                         | < 0.01                         | < 0.05                       | < 0.01                                 |
| DCA           | 438.56±334.85   | 136.47±82.23    | 336.19±95.51    | < 0.01                         | > 0.05                         | < 0.01                       | < 0.01                                 |
| 23-norDCA     | 3.94±2.09       | 1.41±0.26       | 59.17±63.01     | < 0.01                         | < 0.01                         | < 0.01                       | < 0.01                                 |
| 7-ketoDCA     | N.D.            | 212.94±228.96   | 74.00±67.41     |                                |                                | > 0.05                       | > 0.05                                 |
| 3-ketoCA      | 7.07±2.06       | 208.72±107.75   | 8.95±4.72       | < 0.01                         | < 0.01                         | < 0.01                       | < 0.01                                 |
| allo-LCA      | 4.46±4.20       | 4.10±3.10       | 2.39±1.28       | < 0.01                         | > 0.05                         | < 0.01                       | < 0.05                                 |
| iso-LCA       | 37.22±39.41     | 2.45±0.89       | 2.39±1.28       | < 0.01                         | < 0.01                         | > 0.05                       | < 0.01                                 |
| 6-ketoLCA     | 3.34±0.76       | 74.09±57.37     | 3.17±1.67       | < 0.01                         | > 0.05                         | < 0.01                       | < 0.01                                 |
| β-HDCA        | 5.04±3.87       | 89.16±44.47     | 2.80±1.15       | < 0.01                         | < 0.01                         | < 0.01                       | < 0.01                                 |
| β-UDCA        | 315.01±390.47   | 4.02±3.52       | 3.62±1.84       | < 0.01                         | < 0.01                         | < 0.05                       | < 0.01                                 |
| 6,7-diketoLCA | N.D.            | 35.23±22.80     | 9.50±3.80       |                                |                                | < 0.01                       | < 0.01                                 |
| 12-ketoCDCA   | N.D.            | 9978.67±8373.49 | 635.67±405.15   |                                |                                | < 0.01                       | < 0.01                                 |
| ω-MCA         | 4.91±3.86       | 263.19±140.31   | 168.88±72.23    | < 0.01                         | < 0.01                         | < 0.05                       | < 0.01                                 |
| muroCA        | N.D.            | 54.17±39.7      | 10.72±6.83      |                                |                                | < 0.01                       | < 0.01                                 |
| UCA           | N.D.            | 87.28±92.97     | 9.51±9.81       |                                |                                | < 0.05                       | < 0.05                                 |
| ACA           | N.D.            | 279.24±113.85   | 20.72±12.82     |                                |                                | < 0.01                       | < 0.01                                 |
| GCA           | 221.95±207.89   | 71.87±31.25     | 6.34±3.8        | < 0.01                         | < 0.01                         | < 0.01                       | < 0.01                                 |
| TCA           | 28.16±27.07     | 484.76±169.27   | 778.05±550.64   | < 0.01                         | < 0.01                         | > 0.05                       | < 0.01                                 |
| GCDCA         | 975.02±947.00   | 6.28±4.27       | 1.15±0.19       | < 0.01                         | < 0.01                         | < 0.01                       | < 0.01                                 |
| TCDCa         | 86.41±77.00     | 76.98±49.97     | 22.04±19.75     | > 0.05                         | < 0.01                         | < 0.01                       | < 0.01                                 |
| T-α-MCA       | 10.66±4.15      | 263.12±109.57   | 192.27±168.07   | < 0.01                         | < 0.01                         | < 0.05                       | < 0.01                                 |
| T-β-MCA       | N.D.            | 71.93±33.55     | 482.68±402.9    | < 0.01                         | < 0.01                         | < 0.01                       | < 0.01                                 |
| GHCA          | 19.95±16.09     | 1.29±0.29       | 1.08±0.15       | < 0.01                         | > 0.05                         | > 0.05                       | > 0.05                                 |
| GHDCA         | 8.22±9.33       | 32.21±29.39     | N.D.            | < 0.01                         |                                |                              | < 0.01                                 |
| THCA          | 7.32±2.95       | N.D.            | 7.36±0.81       |                                |                                | > 0.05                       | > 0.05                                 |
| THDCA         | 1.77±0.74       | 199.36±118.71   | 51.20±26.63     | < 0.01                         | < 0.01                         | < 0.01                       | < 0.01                                 |
| GUDCA         | 118.91±154.42   | 1.32±0.25       | 1.68±0.60       | < 0.01                         | < 0.01                         | > 0.05                       | < 0.01                                 |
| TUDCA         | 5.28±6.91       | 6.28±2.77       | 54.76±50.07     | > 0.05                         | < 0.01                         | < 0.05                       | < 0.01                                 |
| GLCA          | 11.15±8.34      | N.D.            | N.D.            |                                |                                |                              |                                        |
| TLCA          | 2.05±1.82       | 1.47±0.30       | 2.40±0.55       | > 0.05                         | > 0.05                         | > 0.05                       | > 0.05                                 |
| GDCA          | 315.32±276.02   | 1.74±1.75       | 0.44±0.28       | < 0.01                         | < 0.01                         | < 0.01                       | < 0.01                                 |
| TDCA          | 35.20±24.46     | 9.02±4.18       | 105.40±38.64    | < 0.01                         | < 0.01                         | < 0.01                       | < 0.01                                 |
| T-ω-MCA       | 27.70±4.16      | 21.95±5.27      | 2330.46±2066.88 | > 0.05                         | < 0.05                         | < 0.01                       | < 0.01                                 |
| CA-3S         | N.D.            | 1.73±0.46       | N.D.            |                                |                                |                              |                                        |
| CDCA-3S       | 3.59±3.89       | 2.07±1.03       | N.D.            | < 0.05                         |                                |                              | < 0.01                                 |
| UDCA-3S       | 3.14±2.80       | 4.14±2.76       | 1.16±0.42       | < 0.05                         | < 0.01                         | < 0.01                       | < 0.01                                 |
| LCA-3S        | 20.87±28.21     | 2.81±1.21       | N.D.            | < 0.01                         | < 0.01                         | < 0.01                       | < 0.01                                 |
| DCA-3S        | 3.17 ± 2.29     | N.D.            | N.D.            |                                |                                |                              |                                        |
| GCA-3S        | 2.49 ± 1.74     | N.D.            | N.D.            |                                |                                |                              |                                        |
| TCA-3S        | 1.23 ± 0.49     | 1.45 ± 0.29     | 18.55 ± 16.77   | > 0.05                         | < 0.01                         | < 0.01                       | < 0.01                                 |
| GCDCA-3S      | 206.66 ± 116.17 | 2.20 ± 0.76     | N.D.            | < 0.01                         |                                |                              | < 0.01                                 |
| TCDCa-3S      | 15.29 ± 8.58    | 10.39 ± 7.96    | N.D.            | < 0.05                         |                                |                              | > 0.05                                 |
| GUDCA-3S      | 75.16 ± 407.74  | N.D.            | N.D.            |                                |                                |                              |                                        |
| TUDCA-3S      | 3.60 ± 4.04     | 1.12 ± 0.11     | 1.03 ± 0.03     | < 0.01                         | < 0.01                         | < 0.01                       | < 0.01                                 |
| GLCA-3S       | 509.08 ± 468.34 | N.D.            | N.D.            |                                |                                |                              |                                        |
| TLCA-3S       | 90.32 ± 84.24   | 6.48 ± 5.22     | 1.74 ± 0.06     | < 0.01                         | < 0.01                         | < 0.01                       | < 0.01                                 |
| GDCA-3S       | 267.72± 239.83  | 1.44 ± 0.35     | N.D.            | < 0.01                         |                                |                              | < 0.01                                 |
| TDCA-3S       | 14.16 ± 15.90   | 2.72 ± 1.48     | 1.68 ± 0.43     | < 0.01                         | < 0.05                         | > 0.05                       | < 0.01                                 |

N.D. means no detected in samples, *p* means *p* value

**Supplementary Table 3 Urine bile acid concentrations in humans, rats and mice (nmol/mmol creatinine)**

|                | humans        | rats            | mice          | humans vs rats (p) | humans vs mice (p) | rats vs mice (p) | humans vs rats vs mice (p) |
|----------------|---------------|-----------------|---------------|--------------------|--------------------|------------------|----------------------------|
| CA             | 22.94±27.36   | 1061.37±1001.52 | 140.67±151.42 | < 0.01             | < 0.01             | < 0.01           | < 0.01                     |
| CDCA           | 0.32±0.64     | 1.96±1.84       | 54.27±63.5    | < 0.01             | < 0.01             | < 0.01           | < 0.01                     |
| α-MCA          | 0.36±0.28     | 151.76±131.48   | 227.57±323.69 | < 0.01             | < 0.01             | > 0.05           | < 0.01                     |
| β-MCA          | 1.64±2.09     | 143.93±188.82   | 265.04±289.12 | < 0.01             | < 0.01             | > 0.05           | < 0.01                     |
| HCA            | 0.5±0.63      | 9.85±10.26      | 186.41±272.47 | < 0.01             | < 0.01             | < 0.01           | < 0.01                     |
| HDCA           | 0.38±0.47     | 24.59±37.5      | 238.67±274.55 | < 0.01             | < 0.01             | < 0.01           | < 0.01                     |
| UDCA           | 0.65±0.54     | 4.99±7.71       | 42.92±57.04   | < 0.01             | < 0.01             | < 0.01           | < 0.01                     |
| LCA            | 0.28±0.26     | 3.87±5.81       | 8.81±7.35     | < 0.01             | < 0.01             | < 0.05           | < 0.01                     |
| 7-ketoLCA      | 0.16±0.26     | 0.1±0.33        | 20.95±20.85   | < 0.01             | < 0.01             | < 0.01           | < 0.01                     |
| 12-ketoLCA     | 0.18±0.34     | N.D.            | 83.66±110.19  |                    | < 0.01             |                  | < 0.01                     |
| DCA            | 3.72±5.79     | 21.72±34.41     | 127.74±179.56 | < 0.01             | < 0.01             | < 0.05           | < 0.01                     |
| 7-ketoDCA      | 11.93±15.49   | 246.53±417.01   | 98.94±88.84   | < 0.01             | < 0.01             | < 0.01           | < 0.01                     |
| 3-ketoCA       | N.D.          | 1397.75±1520.97 | 23.11±24.97   |                    |                    | < 0.01           | < 0.05                     |
| dehydro-LCA    | N.D.          | 6.49±7.29       | 8.9±8.46      |                    |                    | > 0.05           | > 0.05                     |
| allo-LCA       | N.D.          | 0.43±0.56       | 0.67±0.68     |                    |                    | > 0.05           | > 0.05                     |
| iso-LCA        | N.D.          | 0.98±1.46       | 1.73±1.6      | < 0.01             | < 0.01             | < 0.05           | < 0.01                     |
| 6-ketoLCA      | N.D.          | 12.06±16.8      | 17.85±19.2    |                    |                    | > 0.05           | > 0.05                     |
| β-HDCA         | N.D.          | 4.17±6.24       | 37.89±69.11   |                    |                    | < 0.01           | < 0.01                     |
| β-UDCA         | 0.08±0.12     | 0.65±1.38       | 3.92±5.96     | < 0.05             | < 0.01             | < 0.01           | < 0.01                     |
| 7,12-diketoLCA | 0.1±0.23      | 64.97±99.3      | 6.03±9.4      | < 0.01             | < 0.01             | < 0.05           | < 0.01                     |
| 6,7-diketoLCA  | 0.03±0.14     | N.D.            | 1.41±3.43     |                    | < 0.05             |                  | < 0.05                     |
| 12-ketoCDCA    | N.D.          | 322.75±480.76   | 627.52±881.19 |                    |                    | > 0.05           | > 0.05                     |
| ω-MCA          | 2.78±3.49     | 261.3±341.42    | 186.83±239.3  | < 0.01             | < 0.01             | > 0.05           | < 0.01                     |
| muroCA         | N.D.          | 2.6±3.07        | 32.08±47.4    |                    |                    | < 0.01           | < 0.01                     |
| DHCA           | 0.37±0.42     | 76.57±158.82    | N.D.          | < 0.01             |                    |                  | < 0.01                     |
| UCA            | 49.16±88.57   | 252.01±290.7    | 16.51±16.68   | < 0.01             | < 0.05             | < 0.01           | < 0.01                     |
| ACA            | N.D.          | 2.19±3.91       | 15.86±19.66   |                    |                    | < 0.05           | < 0.05                     |
| GCA            | 3.53±2.45     | 144.48±140.85   | 1.08±1.54     | < 0.01             | < 0.01             | < 0.01           | < 0.01                     |
| TCA            | 0.64±0.67     | 31.25±25.98     | 13.66±21.2    | < 0.01             | < 0.01             | > 0.05           | < 0.01                     |
| GCDCA          | 1.23±0.92     | 0.53±0.5        | 175.48±283.24 | < 0.05             | > 0.01             | < 0.01           | < 0.01                     |
| TCDCA          | 0.35±0.32     | 4.8±4.53        | 27.29±50.69   | < 0.05             | < 0.05             | > 0.05           | < 0.01                     |
| T-α-MCA        | 5.11±7.42     | 2.91±3.15       | 12.56±25.28   | > 0.05             | > 0.05             | > 0.05           | > 0.05                     |
| T-β-MCA        | N.D.          | 9.64±8.99       | 27.28±43.73   |                    |                    | > 0.05           | < 0.05                     |
| GHCA           | 2.52±2.84     | 0.03±0.1        | 136.65±214.75 | < 0.01             | < 0.01             | < 0.01           | < 0.01                     |
| GHDCA          | 0.01±0.07     | N.D.            | 15.05±23.83   | < 0.01             |                    |                  | < 0.01                     |
| THCA           | 0.05±0.13     | 0.16±0.42       | 356.83±528.23 | < 0.01             | < 0.01             | < 0.01           | < 0.01                     |
| THDCA          | 0.01±0.03     | 4.71±5.31       | 48.38±82.29   | < 0.01             | < 0.01             | < 0.05           | < 0.01                     |
| GUDCA          | 1.55±1.66     | 0.15±0.09       | 0.74±0.65     | < 0.01             | > 0.05             | < 0.05           | < 0.01                     |
| TUDCA          | 0.11±0.27     | 1.64±2.75       | 1.42±1.35     | < 0.01             | < 0.01             | > 0.05           | < 0.01                     |
| GLCA           | N.D.          | N.D.            | 0.65±1.05     |                    |                    |                  |                            |
| TLCA           | N.D.          | N.D.            | 0.04±0.16     |                    |                    |                  |                            |
| GDCA           | 1.29±1.5      | N.D.            | 0.16±0.59     | < 0.01             | < 0.05             | > 0.05           | < 0.01                     |
| TDCA           | N.D.          | 1.43±2.21       | 1.16±1.83     |                    |                    | > 0.05           | > 0.05                     |
| T-ω-MCA        | N.D.          | 27.39±15.04     | 43.02±57.58   |                    |                    | > 0.05           | > 0.05                     |
| GDHCA          | N.D.          | 0.3±0.56        | 20.23±11.67   |                    |                    | < 0.01           | < 0.01                     |
| TDHCA          | N.D.          | 0.35±0.5        | N.D.          |                    |                    |                  |                            |
| CA-3S          | 0.05±0.09     | 61.15±94.02     | N.D.          | < 0.01             |                    |                  | < 0.01                     |
| CDCA-3S        | 4.18±6.56     | 2.59±2.95       | N.D.          | > 0.05             |                    |                  | > 0.05                     |
| UDCA-3S        | 3.53±4.14     | 0.46±0.27       | 4.21±3.71     | < 0.01             | > 0.05             | < 0.01           | < 0.01                     |
| LCA-3S         | 2.76±5.36     | 0.01±0.04       | N.D.          | < 0.01             |                    |                  | < 0.01                     |
| DCA-3S         | 3.28±3.83     | 1.86±1.57       | 17.36±26.03   | > 0.05             | > 0.05             | > 0.05           | > 0.05                     |
| GCA-3S         | 2.57±2.19     | 14.62±14.34     | 1.74±2.45     | > 0.05             | > 0.05             | < 0.05           | < 0.05                     |
| TCA-3S         | 0.22±0.31     | 8.17±6.15       | 28.2±16.66    | < 0.01             | < 0.01             | > 0.05           | < 0.01                     |
| GCDCA-3S       | 102.93±64.1   | 4.52±6.95       | 0.31±0.58     | < 0.01             | < 0.01             | > 0.05           | < 0.01                     |
| TCDCA-3S       | 3.92±2.84     | 4.16±5.43       | N.D.          | > 0.05             |                    |                  | < 0.01                     |
| GUDCA-3S       | 24.23±27.47   | N.D.            | N.D.          |                    |                    |                  |                            |
| TUDCA-3S       | 0.84±0.98     | 0.07±0.1        | N.D.          | > 0.05             |                    |                  | < 0.01                     |
| GLCA-3S        | 109.6±110.79  | N.D.            | N.D.          |                    |                    |                  |                            |
| TLCA-3S        | 17.96±19.44   | N.D.            | N.D.          |                    |                    |                  |                            |
| GDCA-3S        | 213.64±241.85 | 3.74±3.39       | 1.14±2.72     | < 0.01             | < 0.01             | > 0.05           | < 0.01                     |
| TDCA-3S        | 7.23±9.78     | 13.08±13.86     | 0.25±0.56     | > 0.05             | < 0.01             | < 0.01           | < 0.01                     |

N.D. means no detected in samples, p means p value.

**Supplementary Table 4 Feces bile acid concentrations in humans, rats and mice (nmol/g)**

|                | humans          | rats            | mice          | humans vs rats (p) | humans vs mice (p) | rats vs mice (p) | humans vs rats vs mice (p) |
|----------------|-----------------|-----------------|---------------|--------------------|--------------------|------------------|----------------------------|
| CA             | 2710.62±7440.24 | 1.91±0.91       | 93.23±118.72  | < 0.01             | < 0.01             | < 0.01           | < 0.01                     |
| CDCA           | 1469.81±2799.69 | 3.42±2.7        | 9.88±5.42     | < 0.01             | < 0.01             | > 0.05           | < 0.01                     |
| α-MCA          | 6.75±4.14       | 57.42±45.54     | 70.48±49.12   | < 0.01             | < 0.01             | > 0.05           | < 0.01                     |
| β-MCA          | 34.57±86.54     | 135.51±80.76    | 445.67±420.92 | < 0.01             | < 0.01             | > 0.05           | < 0.01                     |
| HCA            | 27.75±34.31     | 21.61±17.18     | 12.94±5.35    | > 0.05             | > 0.05             | > 0.05           | > 0.05                     |
| HDCA           | 45.57±28.9      | 499.82±200.91   | 16.7±10.82    | < 0.01             | < 0.01             | < 0.01           | < 0.01                     |
| UDCA           | 792.87±1258.38  | N.D.            | 24.8±11.96    |                    | < 0.01             |                  | < 0.01                     |
| LCA            | 3643.61±2385.74 | 272.69±189.41   | 30.95±21.04   | < 0.01             | < 0.01             | < 0.01           | < 0.01                     |
| 7-ketoLCA      | 143.45±185.93   | 3±1.94          | 4.41±3.19     | < 0.01             | < 0.01             | > 0.05           | < 0.01                     |
| 12-ketoLCA     | 968.81±892.44   | 135.96±53.54    | 43.08±31.85   | < 0.01             | < 0.01             | > 0.05           | < 0.01                     |
| DCA            | 5298.34±3224.7  | 344.52±173.89   | 169.15±72.14  | < 0.01             | < 0.01             | < 0.01           | < 0.01                     |
| 23-norDCA      | 5.62±5.09       | N.D.            | N.D.          |                    |                    |                  | < 0.01                     |
| 7-ketoDCA      | 304.79±851.6    | N.D.            | 118.29±126.73 |                    | > 0.05             |                  | > 0.05                     |
| 3-ketoCA       | 171.23±484.22   | N.D.            | 23.47±15.47   |                    | > 0.05             |                  | > 0.05                     |
| dehydro-LCA    | 402.77±600.14   | 85.32±61.87     | 12.23±11.18   | < 0.01             | < 0.01             | < 0.01           | < 0.01                     |
| allo-LCA       | 37.6±62.36      | 128.02±122.44   | 4.82±5.23     | < 0.01             | > 0.05             | < 0.01           | < 0.01                     |
| iso-LCA        | 480.8±455.9     | 61.17±45.26     | 5.04±3.57     | < 0.01             | < 0.01             | < 0.01           | < 0.01                     |
| 6-ketoLCA      | 18.93±16.57     | 139.3±57.61     | 5.52±4.16     | < 0.01             | < 0.01             | < 0.01           | < 0.01                     |
| β-HDCA         | 27.16±22.93     | 112.02±60.04    | 4.09±2.23     | < 0.01             | < 0.01             | < 0.01           | < 0.01                     |
| β-UDCA         | 104.89±186.86   | 6.5±2.69        | 2.98±1.69     | < 0.01             | < 0.01             | < 0.01           | < 0.01                     |
| 7,12-diketoLCA | 4.52±6.37       | N.D.            | 7.9±5.43      |                    | > 0.05             |                  | > 0.05                     |
| 6,7-diketoLCA  | N.D.            | 6.98±4.86       | 1.83±0.5      |                    |                    | > 0.05           | > 0.05                     |
| 12-ketoCDCA    | 25.86±32.7      | 1295.32±1020.37 | 528.82±394.92 | < 0.01             | < 0.01             | < 0.05           | < 0.01                     |
| ω-MCA          | 244.56±662.57   | 296.37±156.74   | 198.98±104.89 | < 0.01             | < 0.05             | > 0.05           | < 0.01                     |
| iso-DCA        | 1.84±0.83       | 0.3±0.03        | 0.27±0.04     | < 0.05             | < 0.01             | > 0.05           | < 0.01                     |
| apoCA          | N.D.            | N.D.            | 3.28±2.08     |                    |                    |                  |                            |
| muroCA         | 41.96±43.9      | 23.04±10.05     | 3.09±1.71     | > 0.05             | < 0.05             | < 0.05           | < 0.05                     |
| DHCA           | 2.88±1.73       | N.D.            | N.D.          |                    |                    |                  |                            |
| UCA            | 1125.5±2859.62  | 6.67±3.8        | 3.08±1.87     | < 0.01             | < 0.01             | < 0.01           | < 0.01                     |
| ACA            | 40.01±69.32     | N.D.            | 6.99±6.34     |                    | < 0.01             |                  | < 0.01                     |
| GCA            | 46.98±84.63     | 0.79±0.26       | 0.76±0.36     | < 0.01             | < 0.01             | > 0.05           | < 0.01                     |
| TCA            | 34.93±72.95     | 3.37±1.24       | 4.93±4.35     | > 0.05             | > 0.05             | > 0.05           | > 0.05                     |
| GCDCA          | 65.7±117.03     | 0.99±0.33       | 1.12±0.49     | < 0.01             | < 0.01             | > 0.05           | < 0.01                     |
| TCDCA          | 22.81±56.59     | 1.4±0.83        | 0.79±0.48     | < 0.01             | < 0.01             | < 0.05           | < 0.01                     |
| T-α-MCA        | 6.69±6.49       | N.D.            | 2.76±1        |                    |                    | > 0.05           | > 0.05                     |
| T-β-MCA        | 1.31±0.7        | 2.34±0.31       | 16.75±9.94    | > 0.05             | < 0.01             | > 0.05           | < 0.01                     |
| GHCA           | 0.75±0.27       | N.D.            | N.D.          |                    |                    |                  |                            |
| GHDCA          | 1.18±1.4        | 0.3±0.1         | 0.62±0        | < 0.05             | > 0.05             | > 0.05           | < 0.05                     |
| THCA           | 0.73±0.8        | N.D.            | N.D.          |                    |                    |                  |                            |
| THDCA          | 1.21±0.95       | 1.67±0.72       | N.D.          | > 0.05             |                    |                  | > 0.05                     |
| GUDCA          | 12.71±26.48     | N.D.            | N.D.          |                    |                    |                  |                            |
| TUDCA          | 2.77±3.66       | 0.47±0.12       | 1.08±0.65     | < 0.05             | > 0.05             | > 0.05           | < 0.05                     |
| GLCA           | 0.64±0.73       | 0.09±0.05       | 0.05±0.02     | < 0.01             | < 0.01             | > 0.05           | < 0.01                     |
| TLCA           | 2.4±2.05        | 0.33±0.11       | N.D.          | < 0.01             | < 0.01             | > 0.05           | < 0.01                     |
| GDCA           | 24.55±47.3      | 0.31±0.06       | 0.24±0.01     | < 0.01             | < 0.01             | > 0.05           | < 0.01                     |
| TDCA           | 17.96±31.46     | 1.42±0.12       | N.D.          | < 0.01             | < 0.01             | > 0.05           | < 0.01                     |
| T-ω-MCA        | N.D.            | N.D.            | 32.64±5.77    |                    |                    |                  |                            |
| CA-3S          | 15.51±25.67     | 2.99±2.9        | N.D.          | < 0.01             |                    |                  | < 0.01                     |
| CDCA-3S        | 102.88±155.75   | N.D.            | N.D.          | < 0.01             | < 0.01             |                  | < 0.01                     |
| UDCA-3S        | 70.3±143.21     | 0.52±0.39       | 0.53±0.38     | < 0.01             | < 0.01             | > 0.05           | > 0.05                     |
| LCA-3S         | 174.03±282.05   | 1.19±1.02       | N.D.          | < 0.01             |                    |                  | < 0.01                     |
| DCA-3S         | 349.41±339.97   | N.D.            | 9.13±6.39     |                    | < 0.01             |                  | < 0.01                     |
| GCA-3S         | 1.09±2.22       | N.D.            | 1±0.91        | < 0.01             |                    |                  | < 0.01                     |
| TCA-3S         | 0.77±0.44       | N.D.            | 0.71±0.73     | < 0.01             | < 0.01             | < 0.01           | < 0.01                     |
| GCDCA-3S       | 5.04±5.3        | N.D.            | N.D.          | < 0.01             |                    |                  | < 0.01                     |
| TCDCA-3S       | 1.19±0.95       | 0.23±0.03       | N.D.          | < 0.01             |                    |                  | < 0.01                     |
| GUDCA-3S       | 1.46±1.25       | N.D.            | N.D.          |                    |                    |                  |                            |
| TUDCA-3S       | 0.72±0.64       | N.D.            | N.D.          | > 0.05             |                    |                  |                            |
| GLCA-3S        | 7.71±10.4       | N.D.            | N.D.          | < 0.01             |                    |                  |                            |
| TLCA-3S        | 4.16±4.97       | N.D.            | N.D.          | < 0.01             |                    |                  |                            |
| GDCA-3S        | 4.67±8.14       | N.D.            | 0.43±0.19     |                    | < 0.01             |                  | < 0.01                     |

N.D. means no detected in samples, p means p value.

**Supplementary Table 5 Sex dependent differential BAs of serum in humans, rats and mice**

|                         | Humans |          | rats |          | mice |          |
|-------------------------|--------|----------|------|----------|------|----------|
|                         | FC     | <i>p</i> | FC   | <i>p</i> | FC   | <i>p</i> |
| G-conj-BA-3S%           | 1.41   | 0.0006   | 4.44 | 4.67E-07 | 4.44 | 4.67E-07 |
| conj-PBA%               | 1.46   | 0.0021   | 0.39 | 5.43E-06 | 0.39 | 5.43E-06 |
| GDCA%                   | 1.63   | 0.0022   | 0.39 | 5.66E-06 | 0.39 | 5.66E-06 |
| non12-OH-SBAs           | 0.60   | 0.0026   | 0.56 | 8.41E-06 | 0.56 | 8.41E-06 |
| MCAGroup/%              | 2.22   | 0.0050   | 0.28 | 8.77E-06 | 0.28 | 8.77E-06 |
| 12-OHBAs%               | 1.31   | 0.0052   | 3.62 | 1.05E-05 | 3.62 | 1.05E-05 |
| conj-SBAs%              | 1.32   | 0.0056   | 0.47 | 1.24E-05 | 0.47 | 1.24E-05 |
| GUDCA-3S%               | 0.43   | 0.0063   | 4.85 | 1.81E-05 | 4.85 | 1.81E-05 |
| GCDCA%                  | 1.43   | 0.0068   | 2.30 | 2.34E-05 | 2.30 | 2.34E-05 |
| UDCA%                   | 0.61   | 0.0090   | 0.28 | 2.52E-05 | 0.28 | 2.52E-05 |
| β-UDCA                  | 0.37   | 0.0093   | 0.32 | 3.6E-05  | 0.32 | 3.6E-05  |
| Others BAs              | 0.55   | 0.0095   | 0.41 | 5.11E-05 | 1.94 | 4.91E-05 |
| β-UDCA%                 | 0.46   | 0.0108   | 3.93 | 6.17E-05 | 0.41 | 5.11E-05 |
| T-α-MCA%                | 2.01   | 0.0118   | 0.04 | 6.65E-05 | 3.93 | 6.17E-05 |
| unconj-SBA              | 0.66   | 0.0129   | 1.53 | 0.000188 | 0.04 | 6.65E-05 |
| UDCA                    | 0.52   | 0.0131   | 0.53 | 0.000224 | 1.53 | 0.000188 |
| UDCA group%             | 0.61   | 0.0132   | 0.35 | 0.000277 | 0.53 | 0.000224 |
| GCA%                    | 1.55   | 0.0132   | 0.38 | 0.000304 | 0.35 | 0.000277 |
| T-conj-BAs%             | 1.42   | 0.0143   | 2.69 | 0.000328 | 0.35 | 0.000277 |
| CDCA                    | 0.55   | 0.0148   | 3.15 | 0.000533 | 2.69 | 0.000328 |
| CDCA%                   | 0.57   | 0.0149   | 0.57 | 0.000633 | 0.39 | 0.000374 |
| UDCA-3S                 | 0.48   | 0.0153   | 0.06 | 0.000727 | 0.61 | 0.000381 |
| MCA group               | 1.82   | 0.0170   | 0.53 | 0.000792 | 3.15 | 0.000533 |
| unconj-PBAs%            | 0.62   | 0.0197   | 0.60 | 0.000851 | 0.57 | 0.000633 |
| TCA%                    | 1.79   | 0.0208   | 0.42 | 0.000972 | 0.06 | 0.000727 |
| UDCA-3S%                | 0.48   | 0.0213   | 2.35 | 0.001187 | 0.53 | 0.000792 |
| GUDCA-3S                | 0.37   | 0.0232   | 0.42 | 0.001335 | 0.60 | 0.000851 |
| unconj-PBA              | 0.61   | 0.0273   | 0.44 | 0.001564 | 0.42 | 0.000972 |
| unconj-SBA%             | 0.80   | 0.0311   | 0.12 | 0.00196  | 2.35 | 0.001187 |
| HCA%                    | 0.60   | 0.0312   | 3.10 | 0.002324 | 0.42 | 0.000972 |
| GCDCA-3S                | 0.71   | 0.0353   | 0.32 | 0.002604 | 3.11 | 0.001317 |
| BA-3S/BAs in UDCA group | 0.70   | 0.0358   | 2.62 | 0.002624 | 0.42 | 0.001335 |
| unconj-BA-3S/conj-BAs   | 1.90   | 0.0362   | 0.52 | 0.002642 | 0.44 | 0.001564 |
| DCA group%              | 1.32   | 0.0398   | 0.06 | 0.002896 | 0.12 | 0.00196  |
| iso-LCA                 | 0.52   | 0.0432   | 0.34 | 0.003064 | 3.10 | 0.002324 |
| non12-OH-BAs/12-OH-BAs  | 0.54   | 0.0433   | 0.14 | 0.003217 | 0.32 | 0.002604 |
| conj-PBA-3S             | 0.73   | 0.0452   | 0.46 | 0.003325 | 2.62 | 0.002624 |
| TCA                     | 1.73   | 0.0466   | 2.24 | 0.003445 | 0.52 | 0.002642 |
|                         |        |          | 0.49 | 0.00397  | 0.06 | 0.002896 |
|                         |        |          | 0.49 | 0.00404  | 0.34 | 0.003064 |
|                         |        |          | 2.60 | 0.004652 | 0.14 | 0.003217 |
|                         |        |          | 2.55 | 0.0048   | 0.46 | 0.003325 |
|                         |        |          | 3.91 | 0.00615  | 2.24 | 0.003445 |
|                         |        |          | 0.49 | 0.006599 | 0.49 | 0.00397  |
|                         |        |          | 3.27 | 0.006929 | 0.49 | 0.00404  |
|                         |        |          | 3.41 | 0.008463 | 2.60 | 0.004652 |
|                         |        |          | 3.52 | 0.008477 | 2.55 | 0.0048   |
|                         |        |          | 2.90 | 0.008781 | 3.91 | 0.00615  |
|                         |        |          | 4.30 | 0.009511 | 0.49 | 0.006599 |
|                         |        |          | 1.72 | 0.009778 | 3.27 | 0.006929 |
|                         |        |          | 2.20 | 0.011318 | 3.41 | 0.008463 |
|                         |        |          | 3.57 | 0.013013 | 3.52 | 0.008477 |
|                         |        |          | 3.13 | 0.01402  | 2.90 | 0.008781 |
|                         |        |          | 2.45 | 0.016054 | 4.30 | 0.009511 |
|                         |        |          | 2.47 | 0.016944 | 1.72 | 0.009778 |
|                         |        |          | 6.25 | 0.018133 | 2.20 | 0.011318 |
|                         |        |          | 2.26 | 0.018671 | 3.57 | 0.013013 |
|                         |        |          | 2.61 | 0.022018 | 3.13 | 0.01402  |
|                         |        |          | 2.26 | 0.026615 | 2.45 | 0.016054 |
|                         |        |          | 1.56 | 0.027579 | 2.47 | 0.016944 |
|                         |        |          | 2.85 | 0.028907 | 6.25 | 0.018133 |
|                         |        |          | 1.14 | 0.029746 | 2.26 | 0.018671 |
|                         |        |          | 4.75 | 0.029831 | 2.61 | 0.022018 |
|                         |        |          | 0.24 | 0.034752 | 0.41 | 0.025181 |
|                         |        |          | 2.08 | 0.037406 | 2.26 | 0.026615 |
|                         |        |          | 2.14 | 0.038892 | 1.56 | 0.027579 |
|                         |        |          | 1.00 | 0.04315  | 2.85 | 0.028907 |
|                         |        |          | 1.94 | 0.04315  | 1.14 | 0.029746 |
|                         |        |          | 2.02 | 0.044671 | 4.75 | 0.029831 |
|                         |        |          | 0.50 | 0.048303 | 0.24 | 0.034752 |
|                         |        |          |      |          | 2.08 | 0.037406 |
|                         |        |          |      |          | 2.14 | 0.038892 |
|                         |        |          |      |          | 1.00 | 0.04315  |
|                         |        |          |      |          | 1.94 | 0.04315  |
|                         |        |          |      |          | 2.02 | 0.044671 |
|                         |        |          |      |          | 0.50 | 0.044793 |

FC means fold change of female to male. *p* means *p* value.

**Supplementary Table6 Sex dependent differential BAs of urine in humans, rats and mice**

|                  | humans |          |                          | rats |          |                         | mice  |           |
|------------------|--------|----------|--------------------------|------|----------|-------------------------|-------|-----------|
|                  | FC     | p        |                          | FC   | p        |                         | FC    | p         |
| conj-PBAs        | 2.86   | 0.00095  | TCA-3S                   | 3.79 | 0.000555 | UCA                     | 7.95  | 0.000634  |
| TDCA-3S%         | 1.95   | 0.001992 | GCA-3S                   | 5.85 | 0.001682 | GDHCA                   | 0.39  | 0.000654  |
| conj-PBAs%       | 1.70   | 0.006154 | GDCA-3S                  | 4.66 | 0.001715 | GUDCA%                  | 0.38  | 0.001685  |
| T- $\alpha$ -MCA | 3.23   | 0.0074   | GDCA-3S%                 | 5.49 | 0.002158 | dehydro-LCA%            | 0.27  | 0.003409  |
| $\beta$ -UDCA    | 0.27   | 0.008315 | unconj-BA-3S/conj-BAs    | 3.00 | 0.002259 | T-conj-BA-3S/T-conj-BAs | 0.04  | 0.003671  |
| MCA group        | 2.22   | 0.009145 | $\omega$ -MCA%           | 0.19 | 0.002295 | CDCA                    | 7.69  | 0.007118  |
| LCA%             | 1.80   | 0.012576 | DCA%                     | 0.07 | 0.002438 | CA group%               | 0.31  | 0.007821  |
| DCA-3S%          | 2.00   | 0.013234 | CA group%                | 2.29 | 0.003315 | conj-PBA-3S%            | 0.09  | 0.008976  |
| conj-PBAs        | 1.82   | 0.013925 | TCA                      | 3.76 | 0.003437 | BA-3S/BAs in CA group   | 0.28  | 0.009095  |
| DHCA%            | 1.91   | 0.016255 | CDCA%                    | 0.27 | 0.003454 | TCA-3S%                 | 0.08  | 0.010071  |
| $\beta$ -UDCA%   | 0.27   | 0.016922 | GCA-3S%                  | 6.68 | 0.003929 | T-conj-BA-3S%           | 0.08  | 0.010152  |
| TDCA-3S          | 2.48   | 0.022206 | unconj-PBA-3S%           | 3.27 | 0.003991 | CA%                     | 0.38  | 0.010986  |
| $\alpha$ -MCA%   | 1.54   | 0.022725 | UDCA%                    | 0.08 | 0.004034 | T- $\omega$ -MCA        | 11.58 | 0.011494  |
|                  |        |          | G-conj-BA-3S%            | 6.23 | 0.004475 | unsulfated TBAs         | 1.05  | 0.012085  |
|                  |        |          | G-conj-BA-3S             | 5.52 | 0.004484 | sulfated TBAs%          | 0.19  | 0.012085  |
|                  |        |          | CA-3S%                   | 3.30 | 0.004763 | HCA group               | 8.23  | 0.013826  |
|                  |        |          | $\beta$ -MCA%            | 0.12 | 0.005034 | non12-OH-SBAs           | 5.56  | 0.014615  |
|                  |        |          | non12-OH-PBAs/12-OH-PBAs | 0.10 | 0.005137 | non12-OH-BAs            | 5.34  | 0.014987  |
|                  |        |          | BA-3S/BAs in CDCA group  | 4.69 | 0.005274 | SBAs                    | 4.90  | 0.015021  |
|                  |        |          | ACA%                     | 0.00 | 0.006333 | GDHCA%                  | 0.16  | 0.015649  |
|                  |        |          | CDCA-3S%                 | 2.71 | 0.006584 | unsulfated TBAs         | 4.61  | 0.017781  |
|                  |        |          | HCA group%               | 0.26 | 0.006748 | urinary TBAs            | 4.49  | 0.018628  |
|                  |        |          | DCA group%               | 0.32 | 0.007577 | 7-ketoLCA               | 3.79  | 0.021223  |
|                  |        |          | others BAs%              | 0.78 | 0.007683 | non12-OH-PBAs           | 4.85  | 0.025038  |
|                  |        |          | dehydro-LCA%             | 0.20 | 0.007726 | UDCA-3S                 | 3.02  | 0.025741  |
|                  |        |          | HCA%                     | 0.27 | 0.007922 | T-conj-BAs              | 10.38 | 0.028839  |
|                  |        |          | LCA%                     | 0.10 | 0.008001 | unconj-SBAs             | 4.67  | 0.0300522 |
|                  |        |          | LCA group%               | 0.10 | 0.008074 | DCA group               | 7.66  | 0.0338043 |
|                  |        |          | non12-OH-BAs/12-OH-BAs   | 0.09 | 0.009819 | TCA                     | 12.34 | 0.0338094 |
|                  |        |          | BA-3S/BAs in DCA group   | 4.51 | 0.010359 | CDCA%                   | 2.33  | 0.0346074 |
|                  |        |          | UDCA group%              | 0.24 | 0.010465 | DCA group               | 7.34  | 0.0347166 |
|                  |        |          | DHCA%                    | 5.68 | 0.010474 | DCA                     | 7.57  | 0.0348411 |
|                  |        |          | conj-PBAs                | 3.38 | 0.010829 | HDCA group              | 4.93  | 0.0350674 |
|                  |        |          | 12-ketoCDCA%             | 0.12 | 0.012802 | T- $\beta$ -MCA         | 13.96 | 0.0370057 |
|                  |        |          | CA%                      | 2.09 | 0.013261 | HCA                     | 8.20  | 0.0391593 |
|                  |        |          | 3-ketoCA%                | 2.72 | 0.013814 | PBAs                    | 3.73  | 0.0418762 |
|                  |        |          | TCA%                     | 2.60 | 0.014615 | UDCA group              | 4.86  | 0.0428461 |
|                  |        |          | GCA                      | 3.95 | 0.01489  | UDCA                    | 5.67  | 0.0431313 |
|                  |        |          | G-conj-BA-3S             | 3.91 | 0.014965 | THCA                    | 10.56 | 0.0453252 |
|                  |        |          | $\beta$ -UDCA%           | 0.01 | 0.015423 | others BAs              | 4.22  | 0.0481542 |
|                  |        |          | MCA group%               | 0.41 | 0.016835 | 12-ketoCDCA             | 6.18  | 0.0496888 |
|                  |        |          | UDCA-3S%                 | 0.16 | 0.017811 | unconj-SBAs             | 4.67  | 0.0300522 |
|                  |        |          | UCA%                     | 0.23 | 0.018495 | DCA group               | 7.66  | 0.0338043 |
|                  |        |          | CA group                 | 3.08 | 0.020119 | TCA                     | 12.34 | 0.0338094 |
|                  |        |          | GCA%                     | 3.54 | 0.021184 | CDCA%                   | 2.33  | 0.0346074 |
|                  |        |          | 6-ketoLCA%               | 0.17 | 0.021598 | DCA group               | 7.34  | 0.0347166 |
|                  |        |          | G-conj-BAs               | 3.35 | 0.022591 |                         |       |           |
|                  |        |          | iso-LCA%                 | 0.11 | 0.022957 |                         |       |           |
|                  |        |          | unconj-SBAs%             | 0.82 | 0.026328 |                         |       |           |
|                  |        |          | muroCA%                  | 0.28 | 0.031752 |                         |       |           |
|                  |        |          | conj-PBAs%               | 2.47 | 0.032791 |                         |       |           |
|                  |        |          | HDCA%                    | 0.12 | 0.034013 |                         |       |           |
|                  |        |          | HDCAgroup%               | 0.21 | 0.037065 |                         |       |           |
|                  |        |          | GUDCA%                   | 0.23 | 0.038446 |                         |       |           |
|                  |        |          | PBAs                     | 2.37 | 0.038521 |                         |       |           |
|                  |        |          | unsulfated TBAs%         | 0.99 | 0.040457 |                         |       |           |
|                  |        |          | sulfated TBAs%           | 1.61 | 0.040457 |                         |       |           |
|                  |        |          | unconj-PBAs%             | 1.36 | 0.04267  |                         |       |           |
|                  |        |          | CA                       | 2.88 | 0.049482 |                         |       |           |

FC means fold change of female to male. p means p value.



Supplementary Table7 Sex dependent differential BAs of feces in humans, rats and mice

|           | humans |          |                          | rats  |          |                      | mice |          |
|-----------|--------|----------|--------------------------|-------|----------|----------------------|------|----------|
|           | FC     | p        |                          | FC    | p        |                      | FC   | p        |
| T-β-MCA   | 0.41   | 2.17E-05 | LCA                      | 4.86  | 2.11E-10 | GCA-3S%              | 0.07 | 5.44E-05 |
| TCDCa-3S% | 0.22   | 0.044852 | LCAgroup                 | 4.87  | 2.18E-10 | G-conj-BA-3S         | 0.10 | 0.000219 |
|           |        |          | allo-LCA%                | 4.23  | 1.37E-07 | allo-LCA             | 0.11 | 0.00035  |
|           |        |          | α-MCA                    | 5.64  | 4.79E-06 | unconj-SBA-3S%       | 0.17 | 0.000582 |
|           |        |          | 12-ketoCDCA/CA           | 7.32  | 5.14E-06 | GCA-3S               | 0.11 | 0.000622 |
|           |        |          | allo-LCA                 | 11.53 | 5.59E-06 | allo-LCA%            | 0.07 | 0.000686 |
|           |        |          | TCDCa                    | 3.14  | 9.76E-06 | Residual G-conj-BAs% | 0.28 | 0.000721 |
|           |        |          | non12-OH-SBAs            | 3.17  | 2.2E-05  | conj-PBA-3S          | 0.26 | 0.001418 |
|           |        |          | HCA                      | 5.22  | 2.51E-05 | TCDCa%               | 0.34 | 0.001911 |
|           |        |          | 12-ketoCDCA              | 5.02  | 3.38E-05 | 7,12-diketoLCA%      | 3.72 | 0.003124 |
|           |        |          | non12-OH-PBAs            | 3.24  | 3.45E-05 | LCA%                 | 0.33 | 0.007386 |
|           |        |          | PBAs                     | 3.09  | 3.46E-05 | LCA group%           | 0.33 | 0.007517 |
|           |        |          | iso-LCA                  | 4.34  | 3.73E-05 | β-MCA%               | 2.32 | 0.011745 |
|           |        |          | MCA group                | 3.20  | 4.17E-05 | 7-ketoLCA%           | 3.11 | 0.012308 |
|           |        |          | TBAs                     | 2.54  | 4.46E-05 | MCA group%           | 1.98 | 0.013377 |
|           |        |          | Unsulfated TBAs          | 2.54  | 4.6E-05  | unconj-PBAs%         | 0.76 | 0.014043 |
|           |        |          | unconj-PBAs              | 3.17  | 4.61E-05 | unconj-PBA-3S        | 4.26 | 0.014215 |
|           |        |          | non12-OH-BAs             | 2.65  | 4.64E-05 | iso-LCA%             | 0.36 | 0.015735 |
|           |        |          | UCA                      | 0.35  | 4.68E-05 | apoCA                | 0.42 | 0.017324 |
|           |        |          | non12-OH-BAs             | 2.63  | 5.14E-05 | β-MCA                | 3.86 | 0.018383 |
|           |        |          | isoDCA%                  | 0.37  | 5.21E-05 | MCA group            | 3.26 | 0.02083  |
|           |        |          | SBAs                     | 2.51  | 6.34E-05 | LCA group/CDCA group | 0.27 | 0.020888 |
|           |        |          | unconj-SBAs              | 2.51  | 6.42E-05 | 3-ketoCA%            | 4.33 | 0.022022 |
|           |        |          | othersBAs%               | 2.96  | 8.51E-05 | non12-OH-PBAs        | 3.05 | 0.022407 |
|           |        |          | CA group%                | 0.32  | 0.000178 | 7-keto DCA%          | 6.41 | 0.022859 |
|           |        |          | GLCA                     | 2.78  | 0.00021  | GCDCA%               | 0.43 | 0.027442 |
|           |        |          | LCA%                     | 1.93  | 0.000265 | unconj-PBAs%         | 3.22 | 0.031285 |
|           |        |          | UCA%                     | 0.14  | 0.000266 |                      |      |          |
|           |        |          | LCA group                | 1.93  | 0.000267 |                      |      |          |
|           |        |          | dehydro-LCA              | 3.63  | 0.000414 |                      |      |          |
|           |        |          | 12-ketoCDCA%             | 1.91  | 0.000488 |                      |      |          |
|           |        |          | α-MCA%                   | 2.17  | 0.000578 |                      |      |          |
|           |        |          | unconj-SBA-3S            | 6.81  | 0.000667 |                      |      |          |
|           |        |          | non12-OH-PBAs/12-OH-PBAs | 4.39  | 0.0007   |                      |      |          |
|           |        |          | iso-LCA%                 | 1.69  | 0.000735 |                      |      |          |
|           |        |          | β-MCA                    | 2.66  | 0.000759 |                      |      |          |
|           |        |          | DCA group/CA group       | 2.39  | 0.000837 |                      |      |          |
|           |        |          | G-conj-BAs%              | 0.39  | 0.001546 |                      |      |          |
|           |        |          | Residual G-conj-BAs%     | 0.39  | 0.001546 |                      |      |          |
|           |        |          | CDCA group               | 3.54  | 0.001645 |                      |      |          |
|           |        |          | LCA-3S                   | 5.84  | 0.00176  |                      |      |          |
|           |        |          | non12-OH-SBAs/12-OH-SBAs | 1.96  | 0.001885 |                      |      |          |
|           |        |          | β-UDCA%                  | 0.36  | 0.002239 |                      |      |          |
|           |        |          | HDCA group%              | 0.46  | 0.002308 |                      |      |          |
|           |        |          | sulfated TBAs            | 12.41 | 0.002332 |                      |      |          |
|           |        |          | β-UDCA                   | 1.84  | 0.002356 |                      |      |          |
|           |        |          | HDCA%                    | 0.46  | 0.00236  |                      |      |          |
|           |        |          | CA%                      | 0.27  | 0.00242  |                      |      |          |
|           |        |          | GCA%                     | 0.35  | 0.002451 |                      |      |          |
|           |        |          | LCA group/CDCA group     | 2.02  | 0.002526 |                      |      |          |
|           |        |          | GCDCA%                   | 0.40  | 0.002572 |                      |      |          |
|           |        |          | GHDCa%                   | 0.18  | 0.00364  |                      |      |          |
|           |        |          | T-conj-BAs               | 1.62  | 0.003871 |                      |      |          |
|           |        |          | UDCA group               | 3.35  | 0.003898 |                      |      |          |
|           |        |          | 12-ketoLCA               | 1.74  | 0.004071 |                      |      |          |
|           |        |          | muroCA%                  | 0.45  | 0.00459  |                      |      |          |
|           |        |          | unconj-PBAs-3S           | 17.89 | 0.004959 |                      |      |          |
|           |        |          | TCA%                     | 0.35  | 0.005516 |                      |      |          |
|           |        |          | β-UDCA%                  | 0.72  | 0.005727 |                      |      |          |
|           |        |          | unconj-BAs/conj-BAs      | 1.78  | 0.006805 |                      |      |          |
|           |        |          | 6-ketoLCA%               | 0.32  | 0.007011 |                      |      |          |
|           |        |          | DCA                      | 1.99  | 0.007131 |                      |      |          |
|           |        |          | DCA group                | 2.00  | 0.007152 |                      |      |          |
|           |        |          | HCA%                     | 1.93  | 0.007262 |                      |      |          |
|           |        |          | 12-ketoLCA%              | 0.66  | 0.00738  |                      |      |          |
|           |        |          | HCA group%               | 1.90  | 0.007718 |                      |      |          |
|           |        |          | THDCA                    | 1.78  | 0.008051 |                      |      |          |
|           |        |          | unconj-BA-3S-conj-BAs    | 1.74  | 0.0083   |                      |      |          |
|           |        |          | 12-OH-BAs                | 1.90  | 0.008962 |                      |      |          |
|           |        |          | CDCA                     | 3.07  | 0.009027 |                      |      |          |
|           |        |          | G-conj-BA-3S             | 29.03 | 0.010683 |                      |      |          |
|           |        |          | unconj-SBA%              | 0.52  | 0.011127 |                      |      |          |
|           |        |          | T-conj BAs/G-conj BAs    | 1.62  | 0.012772 |                      |      |          |
|           |        |          | con-BAs%                 | 0.54  | 0.013366 |                      |      |          |
|           |        |          | unconj-BAs%              | 1.00  | 0.014103 |                      |      |          |
|           |        |          | sulfated TBAs%           | 5.18  | 0.017407 |                      |      |          |
|           |        |          | unsulfated TBAs%         | 1.00  | 0.017407 |                      |      |          |
|           |        |          | conj-SBAs%               | 7.44  | 0.021346 |                      |      |          |
|           |        |          | unconj-PBA-3S%           | 2.84  | 0.021709 |                      |      |          |
|           |        |          | LCA-3S%                  | 2.84  | 0.021709 |                      |      |          |
|           |        |          | non12-OH-BAs/12-OH-BAs   | 1.47  | 0.023081 |                      |      |          |
|           |        |          | CDCA-3S                  | 11.48 | 0.032267 |                      |      |          |
|           |        |          | conj-PBAs                | 1.33  | 0.038717 |                      |      |          |
|           |        |          | others BAs%              | 1.14  | 0.043552 |                      |      |          |

FC means fold change of female to male. p means p value.

**Supplementary Table 8 Parameters of detected bile acids**

| compound                                        | parent | daughter | Cone (V) | Collision (V) | IS                                                                                                                                                                     |
|-------------------------------------------------|--------|----------|----------|---------------|------------------------------------------------------------------------------------------------------------------------------------------------------------------------|
| dehydro-LCA                                     | 373.3  | 373.3    | 44       | 5             | LCA-d <sub>4</sub>                                                                                                                                                     |
| allo-LCA/iso-LCA/LCA                            | 375.3  | 375.3    | 55       | 15            | LCA-d <sub>4</sub>                                                                                                                                                     |
| 23-norDCA                                       | 377.3  | 377.3    | 56       | 5             | UDCA-d <sub>4</sub>                                                                                                                                                    |
| 6-ketoLCA/7-ketoLCA/12-ketoLCA/apoCA            | 389.3  | 389.3    | 55       | 10            | LCA-d <sub>4</sub> /LCA-d <sub>4</sub> /LCA-d <sub>4</sub> /CA-d <sub>4</sub>                                                                                          |
| muroCA/β-UDCA/β-HDCA/UDCA/HDCA/CDCA/DCA/iso-DCA | 391.3  | 391.3    | 60       | 10            | UDCA-d <sub>4</sub> /UDCA-d <sub>4</sub> /HDCA-d <sub>5</sub> /UDCA-d <sub>4</sub> /HDCA-d <sub>5</sub> /UDCA-d <sub>4</sub> /UDCA-d <sub>4</sub> /UDCA-d <sub>4</sub> |
| DHCA                                            | 401.3  | 401.3    | 40       | 10            | HCA-d <sub>5</sub>                                                                                                                                                     |
| 7,12-diketoLCA/6,7-diketoLCA                    | 403.3  | 403.3    | 60       | 10            | LCA-d <sub>4</sub> /LCA-d <sub>4</sub>                                                                                                                                 |
| 7-ketoDCA/12-ketoCDCA/3-ketoCA                  | 405.3  | 405.3    | 65       | 5             | UDCA-d <sub>4</sub> /CA-d <sub>4</sub> /CA-d <sub>4</sub>                                                                                                              |
| UCA/ω-MCA/β-CA/α-MCA/β-MCA/HCA/ACA/CA           | 407.3  | 407.3    | 62       | 10            | CA-d <sub>4</sub> /CA-d <sub>4</sub> /CA-d <sub>4</sub> /CA-d <sub>4</sub> /CA-d <sub>4</sub> /HCA-d <sub>5</sub> /HCA-d <sub>5</sub> /CA-d <sub>4</sub>               |
| GLCA                                            | 432.4  | 73.9     | 58       | 34            | LCA-d <sub>4</sub>                                                                                                                                                     |
| GUDCA/GHDCA/GCDCA/GDCA                          | 448.4  | 73.9     | 58       | 40            | GCDCA-d <sub>4</sub> /HDCA-d <sub>5</sub> /GCDCA-d <sub>4</sub> /GDCA-d <sub>4</sub>                                                                                   |
| GDHCA                                           | 458.4  | 73.9     | 50       | 40            | GCA-d <sub>4</sub>                                                                                                                                                     |
| GHCA/GCA                                        | 464.3  | 73.9     | 60       | 48            | HCA-d <sub>5</sub> /GCA-d <sub>4</sub>                                                                                                                                 |
| TLCA                                            | 482.4  | 79.9     | 88       | 72            | LCA-d <sub>4</sub>                                                                                                                                                     |
| TUDCA/THDCA/TCDC/CDCA/TDCA                      | 498.4  | 79.9     | 60       | 75            | GCDCA-d <sub>4</sub> /HDCA-d <sub>5</sub> /GCDCA-d <sub>4</sub> /GCA-d <sub>4</sub>                                                                                    |
| TDHCA                                           | 508.4  | 79.9     | 80       | 75            | GCA-d <sub>4</sub>                                                                                                                                                     |
| T-ω-MCA/T-α-MCA/T-β-MCA/THCA/TCA                | 514.4  | 79.9     | 80       | 75            | GCA-d <sub>4</sub> /GCA-d <sub>4</sub> /GCA-d <sub>4</sub> /GCA-d <sub>4</sub>                                                                                         |
| CA-3S                                           | 487.4  | 97.0     | 30       | 35            | DCA-3S-d <sub>4</sub>                                                                                                                                                  |
| LCA-3S                                          | 455.4  | 97.0     | 40       | 40            | DCA-3S-d <sub>4</sub>                                                                                                                                                  |
| UDCA-3S/CDCA-3S/DCA-3S                          | 471.4  | 97.0     | 50       | 40            | DCA-3S-d <sub>4</sub> /DCA-3S-d <sub>4</sub> /DCA-3S-d <sub>4</sub>                                                                                                    |
| GCA-3S                                          | 544.4  | 464.4    | 40       | 30            | GCA-3S-d <sub>4</sub>                                                                                                                                                  |
| TCA-3S                                          | 594.3  | 514.3    | 30       | 20            | GCA-3S-d <sub>4</sub>                                                                                                                                                  |
| GLCA-3S                                         | 512.4  | 432.4    | 40       | 30            | GCA-3S-d <sub>4</sub>                                                                                                                                                  |
| TLCA-3S                                         | 562.4  | 482.4    | 25       | 25            | GCA-3S-d <sub>4</sub>                                                                                                                                                  |
| GUDCA-3S/GCDCA-3S/GDCA-3S                       | 528.4  | 448.4    | 45       | 30            | GCA-3S-d <sub>4</sub> /GCA-3S-d <sub>4</sub> /GCA-3S-d <sub>4</sub>                                                                                                    |
| TUDCA-3S/TCDC/CDCA-3S/TDCA-3S                   | 578.4  | 498.4    | 30       | 25            | GCA-3S-d <sub>4</sub> /GCA-3S-d <sub>4</sub> /GCA-3S-d <sub>4</sub>                                                                                                    |
| LCA-d <sub>4</sub>                              | 379.4  | 379.4    | 56       | 18            | /                                                                                                                                                                      |
| UDCA-d <sub>4</sub>                             | 395.4  | 395.4    | 40       | 23            | /                                                                                                                                                                      |
| CA-d <sub>4</sub>                               | 411.3  | 411.3    | 45       | 20            | /                                                                                                                                                                      |
| GCDCA-d <sub>4</sub> /GDCA-d <sub>4</sub>       | 452.4  | 73.9     | 45       | 40            | /                                                                                                                                                                      |
| GCA-d <sub>4</sub>                              | 468.4  | 73.9     | 58       | 44            | /                                                                                                                                                                      |
| HCA-d <sub>5</sub>                              | 412.5  | 412.5    | 50       | 10            | /                                                                                                                                                                      |
| HDCA-d <sub>5</sub>                             | 396.5  | 396.5    | 50       | 10            | /                                                                                                                                                                      |
| DCA-3S-d <sub>4</sub>                           | 475.2  | 97.9     | 50       | 40            | /                                                                                                                                                                      |
| GCA-3S-d <sub>4</sub>                           | 548.4  | 468.4    | 40       | 30            | /                                                                                                                                                                      |

**Supplementary Table 9 Linearity, limits of detection (LOD) and quantification (LOQ) results in serum**

|                  | LOD (nmol/L) | LOQ (nmol/L) | Linear range (nmol/L) |           |         |
|------------------|--------------|--------------|-----------------------|-----------|---------|
|                  |              |              | human                 | rat       | mouse   |
| CA               | 0.5          | 1            | 5-500                 | 50-2000   | 10-1000 |
| CDCA             | 0.1          | 0.2          | 5-2000                | 50-2000   | 10-500  |
| $\alpha$ -MCA    | 2            | 2            | 5-200                 | 50-2000   | 5-200   |
| $\beta$ -MCA     | 2            | 2            | /                     | 50-2000   | 20-1000 |
| HCA              | 0.5          | 1            | 1-100                 | 5-500     | 1-200   |
| HDCA             | 1            | 1            | 1-100                 | 50-2000   | 1-100   |
| UDCA             | 1            | 1            | 10-1000               | 20-1000   | 1-200   |
| LCA              | 0.2          | 0.5          | 1-100                 | 1-100     | 1-100   |
| 7-ketoLCA        | 0.5          | 1            | 1-100                 | 10-500    | 1-100   |
| 12-ketoLCA       | 1            | 2            | 5-200                 | 5-200     | 5-200   |
| DCA              | 0.1          | 0.2          | 1-2000                | 10-500    | 20-1000 |
| 23-norDCA        | 1            | 2            | 5-200                 | 5-200     | 5-200   |
| 7-ketoDCA        | 2            | 2            | /                     | 5-1000    | 5-500   |
| 3-ketoCA         | 2            | 2            | 5-200                 | 10-1000   | 5-200   |
| dehydro-LCA      | 0.5          | 1            | /                     | /         | /       |
| allo-LCA         | 0.2          | 0.5          | 1-100                 | 1-100     | 1-100   |
| iso-LCA          | 0.2          | 0.5          | 1-200                 | 1-100     | 1-100   |
| 6-ketoLCA        | 0.5          | 1            | 1-100                 | 5-500     | 1-100   |
| $\beta$ -HDCA    | 1            | 1            | 1-100                 | 10-500    | 1-100   |
| $\beta$ -UDCA    | 1            | 1            | 20-2000               | 1-100     | 1-100   |
| 7,12-diketoLCA   | 1            | 1            | /                     | /         | /       |
| 6,7-diketoLCA    | 1            | 2            | /                     | 5-200     | 5-200   |
| 12-ketoCDCA      | 2            | 2            | /                     | 50-2000   | 50-2000 |
| $\omega$ -MCA    | 1            | 1            | 1-100                 | 20-1000   | 10-500  |
| $\beta$ -CA      | 1            | 1            | 1-100                 | 20-1000   | 10-500  |
| isoDCA           | 0.2          | 0.5          | /                     | /         | /       |
| apoCA            | 1            | 2            | /                     | /         | /       |
| muroCA           | 1            | 1            | /                     | 1-200     | 1-100   |
| DHCA             | 2            | 2            | /                     | 5-200     | /       |
| UCA              | 0.5          | 1            | /                     | 1-500     | 1-100   |
| ACA              | 1            | 2            | /                     | Tab15-500 | 5-200   |
| GCA              | 0.2          | 0.2          | 10-2000               | 10-500    | 1-100   |
| TCA              | 1            | 2            | 5-500                 | 50-2000   | 20-2000 |
| GCDCA            | 0.5          | 1            | 20-2000               | 1-100     | 1-100   |
| TCDCA            | 1            | 1            | 5-500                 | 5-200     | 1-100   |
| GHCA             | 0.5          | 0.5          | 1-100                 | 1-100     | 1-100   |
| THCA             | 1            | 2            | 5-200                 | 5-200     | 5-200   |
| GHDCA            | 0.5          | 1            | 1-100                 | 1-100     | /       |
| THDCA            | 1            | 1            | 1-100                 | 10-500    | 1-200   |
| GUDCA            | 0.5          | 1            | 1-1000                | 1-100     | 1-100   |
| TUDCA            | 1            | 1            | 1-100                 | 1-100     | 1-200   |
| GLCA             | 0.5          | 1            | 1-100                 | 1-100     | 1-100   |
| TLCA             | 0.5          | 1            | 1-100                 | 1-100     | 1-100   |
| GDCA             | 0.5          | 1            | 1-2000                | 1-100     | 1-100   |
| TDCA             | 1            | 1            | 1-200                 | 1-100     | 10-500  |
| T- $\omega$ -MCA | 10           | 20           | 20-1000               | 20-1000   | 20-2000 |
| T- $\alpha$ -MCA | 2            | 5            | 5-200                 | 50-500    | 10-1000 |
| T- $\beta$ -MCA  | 5            | 5            | 5-200                 | 10-500    | 20-2000 |
| GDHCA            | 0.5          | 1            | /                     | /         | /       |
| TDHCA            | 0.5          | 1            | /                     | /         | /       |
| CA-3S            | 0.2          | 0.2          | /                     | 1-100     | /       |
| CDCA-3S          | 0.2          | 0.5          | 1-100                 | 1-100     | 1-100   |
| UDCA-3S          | 0.2          | 0.5          | 1-100                 | 1-100     | 1-100   |
| LCA-3S           | 0.5          | 1            | 1-200                 | 1-100     | 1-100   |
| DCA-3S           | 0.2          | 0.5          | 1-100                 | 1-100     | 1-100   |
| GCA-3S           | 0.2          | 0.5          | 1-100                 | 1-100     | 1-100   |
| TCA-3S           | 0.2          | 0.5          | 1-100                 | 1-100     | 1-100   |
| GCDCA-3S         | 0.5          | 1            | 10-1000               | 1-100     | /       |
| TCDCA-3S         | 0.5          | 0.5          | 1-100                 | 1-100     | /       |
| GUDCA-3S         | 0.5          | 1            | 5-1000                | /         | /       |
| TUDCA-3S         | 0.2          | 0.5          | 1-100                 | 1-100     | 1-100   |
| GLCA-3S          | 2            | 2            | 5-2000                | 5-200     | /       |
| TLCA-3S          | 0.5          | 1            | 1-500                 | 1-100     | 1-100   |
| GDCA-3S          | 0.5          | 1            | 10-2000               | 1-100     | /       |
| TDCA-3S          | 0.5          | 0.5          | 1-100                 | 1-100     | 1-100   |

**Supplementary Table10 Linearity, limits of detection (LOD) and quantification (LOQ) results in urine**

|                  | LOD (nmol/L) | LOQ (nmol/L) | Linear range (nmol/L) |         |         |
|------------------|--------------|--------------|-----------------------|---------|---------|
|                  |              |              | human                 | rat     | mouse   |
| CA               | 0.5          | 0.5          | 1-2000                | 50-2000 | 10-1000 |
| CDCA             | 0.1          | 0.2          | 1-100                 | 1-100   | 1-500   |
| $\alpha$ -MCA    | 0.5          | 1            | 1-100                 | 50-2000 | 1-2000  |
| $\beta$ -MCA     | 1            | 2            | 5-200                 | 20-1000 | 5-2000  |
| HCA              | 0.5          | 0.5          | 1-100                 | 1-100   | 1-2000  |
| HDCA             | 1            | 1            | 1-100                 | 5-200   | 1-2000  |
| UDCA             | 0.5          | 1            | 1-100                 | 1-100   | 1-1000  |
| LCA              | 0.2          | 0.5          | 1-100                 | 1-100   | 1-100   |
| 7-ketoLCA        | 0.5          | 1            | 1-100                 | 1-100   | 1-200   |
| 12-ketoLCA       | 0.5          | 1            | 1-100                 | /       | 1-1000  |
| DCA              | 0.1          | 0.2          | 1-500                 | 1-200   | 1-2000  |
| 23-norDCA        | 0.5          | 1            | /                     | /       | /       |
| 7-ketoDCA        | 1            | 1            | 1-1000                | 1-2000  | 5-1000  |
| 3-ketoCA         | 1            | 1            | /                     | 10-2000 | 1-500   |
| dehydro-LCA      | 0.2          | 0.5          | /                     | 1-100   | 1-100   |
| allo-LCA         | 0.1          | 0.2          | /                     | 1-100   | 1-100   |
| iso-LCA          | 0.1          | 0.2          | 1-100                 | 1-100   | 1-100   |
| 6-ketoLCA        | 0.5          | 1            | /                     | 1-100   | 1-200   |
| $\beta$ -HDCA    | 0.5          | 1            | /                     | 1-100   | 1-500   |
| $\beta$ -UDCA    | 0.5          | 0.5          | 1-100                 | 1-100   | 1-100   |
| 7,12-diketolCA   | 2            | 5            | 5-200                 | 5-1000  | 5-200   |
| 6,7-diketolCA    | 2            | 5            | 5-200                 | 5-200   | 5-200   |
| 12-ketoCDCA      | 1            | 1            | /                     | 50-2000 | 20-2000 |
| $\omega$ -MCA    | 0.5          | 1            | 1-100                 | 50-2000 | 5-2000  |
| $\beta$ -CA      | 0.5          | 1            | 1-100                 | 50-2000 | 5-2000  |
| isoDCA           | 0.2          | 0.5          | /                     | /       | /       |
| apoCA            | 1            | 2            | /                     | /       | /       |
| muroCA           | 0.5          | 1            | /                     | 1-100   | 1-500   |
| DHCA             | 0.5          | 1            | 1-100                 | 5-2000  | /       |
| UCA              | 0.5          | 0.5          | 1-2000                | 50-2000 | 1-100   |
| ACA              | 0.5          | 1            | /                     | 1-100   | 1-200   |
| GCA              | 0.2          | 0.5          | 1-200                 | 1-2000  | 1-100   |
| TCA              | 1            | 2            | 5-200                 | 5-1000  | 5-200   |
| GCDCA            | 0.5          | 1            | 1-100                 | 1-100   | 1-2000  |
| TCDCA            | 0.5          | 1            | 1-100                 | 1-100   | 1-500   |
| GHCA             | 0.2          | 0.5          | 1-500                 | 1-100   | 1-2000  |
| THCA             | 1            | 2            | 5-200                 | 5-200   | 5-200   |
| GHDCA            | 0.5          | 1            | 1-100                 | 1-100   | 1-2000  |
| THDCA            | 1            | 1            | 1-100                 | 1-200   | 1-1000  |
| GUDCA            | 0.5          | 1            | 1-100                 | 1-100   | 1-100   |
| TUDCA            | 1            | 1            | 1-100                 | 1-100   | 1-100   |
| GLCA             | 0.5          | 0.5          | 1-100                 | /       | 1-100   |
| TLCA             | 0.5          | 1            | /                     | /       | 1-100   |
| GDCA             | 2            | 2            | 5-200                 | 5-200   | 5-200   |
| TDCA             | 0.5          | 1            | /                     | 1-100   | 1-100   |
| T- $\omega$ -MCA | 10           | 20           | /                     | 20-1000 | 20-500  |
| T- $\alpha$ -MCA | 2            | 5            | 5-1000                | 5-200   | 5-200   |
| T- $\beta$ -MCA  | 2            | 5            | /                     | 5-500   | 5-500   |
| GDHCA            | 0.5          | 1            | /                     | 1-100   | 1-100   |
| TDHCA            | 0.2          | 0.5          | /                     | 1-100   | /       |
| CA-3S            | 0.2          | 0.5          | 1-100                 | 1-1000  | /       |
| CDCA-3S          | 0.2          | 0.5          | 1-500                 | 1-100   | 1-100   |
| UDCA-3S          | 0.2          | 0.5          | 1-500                 | 1-100   | 1-100   |
| LCA-3S           | 0.2          | 0.5          | 1-500                 | 1-100   | /       |
| DCA-3S           | 0.2          | 0.5          | 1-200                 | 1-100   | 1-500   |
| GCA-3S           | 0.2          | 0.5          | 1-200                 | 1-500   | 1-100   |
| TCA-3S           | 0.2          | 0.5          | 1-100                 | 1-200   | 1-200   |
| GCDCA-3S         | 0.2          | 0.5          | 50-2000               | 1-200   | 1-100   |
| TCDCA-3S         | 0.5          | 1            | 1-500                 | 1-200   | 1-100   |
| GUDCA-3S         | 0.5          | 1            | 5-2000                | /       | /       |
| TUDCA-3S         | 0.2          | 0.5          | 1-100                 | 1-100   | 1-100   |
| GLCA-3S          | 0.5          | 1            | 1-2000                | 1-100   | 1-100   |
| TLCA-3S          | 0.5          | 1            | 1-2000                | /       | /       |
| GDCA-3S          | 0.2          | 0.5          | 1-2000                | 1-100   | 1-100   |
| TDCA-3S          | 0.5          | 1            | 1-1000                | 1-200   | 1-100   |

**Supplementary Table 11 Linearity, limits of detection (LOD) and quantification (LOQ) results in feces**

|                  | LOD (nmol/L) | LOQ (nmol/L) | Linear range (nmol/L) |          |          |
|------------------|--------------|--------------|-----------------------|----------|----------|
|                  |              |              | human                 | rat      | mouse    |
| CA               | 1            | 1            | 1-2000                | 1-100    | 1-2000   |
| CDCA             | 0.5          | 1            | 1-2000                | 1-100    | 5-500    |
| $\alpha$ -MCA    | 0.5          | 1            | 1-100                 | 5-1000   | 50-2000  |
| $\beta$ -MCA     | 0.5          | 1            | 1-100                 | 20-2000  | 50-2000  |
| HCA              | 1            | 2            | 5-200                 | 5-500    | 5-200    |
| HDCA             | 1            | 2            | 5-200                 | 50-2000  | 5-500    |
| UDCA             | 1            | 2            | 5-2000                | 5-200    | 10-1000  |
| LCA              | 0.2          | 0.5          | 1-2000                | 50-2000  | 5-500    |
| 7-ketoLCA        | 1            | 2            | 5-500                 | 5-200    | 5-200    |
| 12-ketoLCA       | 1            | 2            | 5-1000                | 50-2000  | 5-1000   |
| DCA              | 0.2          | 0.5          | 1-2000                | 50-2000  | 20-2000  |
| 23-norDCA        | 2            | 5            | 5-200                 | 5-200    | 5-200    |
| 7-ketoDCA        | 2            | 2            | 5-1000                | 5-200    | 10-2000  |
| 3-ketoCA         | 5            | 5            | 5-200                 | /        | 5-500    |
| dehydroLCA       | 0.5          | 1            | 1-500                 | 20-2000  | 1-500    |
| allo-LCA         | 0.2          | 0.5          | 1-200                 | 20-2000  | 1-100    |
| iso-LCA          | 0.2          | 0.5          | 1-2000                | 20-1000  | 1-100    |
| 6-ketoLCA        | 1            | 2            | 5-200                 | 50-2000  | 5-200    |
| $\beta$ -HDCA    | 1            | 2            | 5-200                 | 50-2000  | 5-200    |
| $\beta$ -UDCA    | 1            | 1            | 1-500                 | 1-100    | 1-100    |
| 7,12-diketolCA   | 1            | 2            | 5-200                 | /        | 5-200    |
| 6,7-diketolCA    | 2            | 5            | /                     | 5-200    | 5-200    |
| 12-ketoCDCA      | 5            | 5            | 5-200                 | 50-2000  | 50-2000  |
| $\omega$ -MCA    | 0.5          | 1            | 1-500                 | 50-2000  | 10-2000  |
| $\beta$ -CA      | 0.5          | 1            | 1-500                 | 50-2000  | 10-2000  |
| isoDCA           | 0.2          | 0.5          | 1-100                 | 1-100    | 1-100    |
| apoCA            | 1            | 2            | /                     | /        | 5-200    |
| muroCA           | 1            | 1            | 1-100                 | 5-200    | 1-100    |
| DHCA             | 1            | 2            | 5-200                 | 5-200    | 5-200    |
| UCA              | 2            | 2            | 5-2000                | 5-200    | 5-200    |
| ACA              | 1            | 2            | 5-200                 | 5-200    | 5-500    |
| GCA              | 0.2          | 0.2          | 1-200                 | 1-100    | 1-100    |
| TCA              | 2            | 5            | 5-200                 | 5-200    | 5-200    |
| GCDCA            | 1            | 1            | 1-500                 | 1-100    | 1-100    |
| TCDCA            | 0.5          | 1            | 1-200                 | 1-100    | 1-100    |
| GHCA             | 0.5          | 2            | 5-200                 | 5-200    | 5-200    |
| THCA             | 0.5          | 1            | 1-100                 | 1-100    | 1-100    |
| GHDCA            | 0.5          | 1            | 1-100                 | 1-100    | 1-100    |
| THDCA            | 0.5          | 1            | 1-100                 | 1-100    | 1-100    |
| GUDCA            | 0.5          | 1            | 1-100                 | 1-100    | 1-100    |
| TUDCA            | 0.2          | 0.5          | 1-100                 | 1-100    | 1-100    |
| GLCA             | 0.5          | 0.1          | 1-100                 | 1-100    | 1-100    |
| TLCA             | 1            | 2            | 5-200                 | 5-200    | 5-200    |
| GDCA             | 1            | 1            | 1-200                 | 1-100    | 1-100    |
| TDCA             | 1            | 2            | 5-200                 | 5-200    | 5-200    |
| T- $\omega$ -MCA | 50           | 100          | 100-2000              | 100-2000 | 100-2000 |
| T- $\alpha$ -MCA | 5            | 10           | 10-500                | 10-500   | 10-500   |
| T- $\beta$ -MCA  | 5            | 10           | 10-500                | 10-500   | 10-1000  |
| GDHCA            | 0.5          | 1            | /                     | /        | /        |
| TDHCA            | 0.5          | 1            | /                     | /        | /        |
| CA-3S            | 0.5          | 0.5          | 1-100                 | 1-100    | 1-100    |
| CDCA-3S          | 0.5          | 0.5          | 1-500                 | 1-100    | 1-100    |
| UDCA-3S          | 1            | 1            | 1-500                 | 1-100    | 1-100    |
| LCA-3S           | 1            | 1            | 1-500                 | 1-100    | 1-100    |
| DCA-3S           | 0.5          | 0.5          | 1-500                 | 1-100    | 1-200    |
| GCA-3S           | 0.5          | 1            | 1-100                 | 1-100    | 1-100    |
| TCA-3S           | 1            | 1            | 1-100                 | 1-100    | 1-200    |
| GCDCA-3S         | 2            | 2            | 5-200                 | 5-200    | 5-200    |
| TCDCA-3S         | 1            | 1            | 1-100                 | 1-100    | 1-100    |
| GUDCA-3S         | 0.5          | 1            | 1-100                 | 1-100    | 1-100    |
| TUDCA-3S         | 1            | 2            | 5-200                 | 5-200    | 5-200    |
| GLCA-3S          | 2            | 2            | 5-200                 | 5-200    | 5-200    |
| TLCA-3S          | 2            | 5            | 5-200                 | 5-200    | 5-200    |
| GDCA-3S          | 1            | 1            | 1-100                 | 1-100    | 1-100    |
| TDCA-3S          | 1            | 1            | 1-100                 | 1-100    | 1-100    |

Supplementary Table 12 Precision (%)

|                | serum             |                    |                     | urine             |                    |                     | feces             |                    |                     |
|----------------|-------------------|--------------------|---------------------|-------------------|--------------------|---------------------|-------------------|--------------------|---------------------|
|                | STD-L<br>10nmol/L | STD-M<br>100nmol/L | STD-H<br>1000nmol/L | STD-L<br>10nmol/L | STD-M<br>100nmol/L | STD-H<br>1000nmol/L | STD-L<br>10nmol/L | STD-M<br>100nmol/L | STD-H<br>1000nmol/L |
| CA             | 91.48             | 69.83              | 104.83              | 104.39            | 82.01              | 97.6                | 95.88             | 96.19              | 98.77               |
| CDCA           | 99.72             | 112                | 96.5                | 121.23            | 118.55             | 101.74              | 115.53            | 114.62             | 101.23              |
| α-MCA          | 115.69            | 84.27              | 97.27               | 111.92            | 111.53             | 92.7                | 105.79            | 101.89             | 97.91               |
| β-MCA          | 134.08            | 109.44             | 98.65               | 91.44             | 113.79             | 102.8               | 94.7              | 103.35             | 99.07               |
| HCA            | 51.33             | 46.8               | 91.17               | 145.53            | 104.58             | 102.02              | 95.02             | 108.57             | 103.78              |
| HDCA           | 125.53            | 90.2               | 99.92               | 96.68             | 94.37              | 98                  | 88.32             | 91.39              | 85.62               |
| UDCA           | 153.12            | 90                 | 105.05              | 111.76            | 76.95              | 92.7                | 84.28             | 106.36             | 101.85              |
| LCA            | 103.01            | 103.83             | 97.65               | 111.25            | 107.46             | 99.44               | 114.32            | 107.41             | 99.34               |
| 7-ketoLCA      | 109.99            | 80.67              | 106.34              | 70.76             | 93.73              | 101.7               | 93.85             | 91.74              | 97.75               |
| 12-ketoLCA     | 117.3             | 102.37             | 116.75              | 90.01             | 107.68             | 101.27              | 148.13            | 100.03             | 97.89               |
| DCA            | 84.3              | 117.32             | 106.9               | 138.56            | 119.59             | 98.27               | 121.11            | 110.1              | 102.31              |
| 23-norDCA      | 101.79            | 105.98             | 104.69              | 109.52            | 101.95             | 101.8               | 89.31             | 98.65              | 97.55               |
| 7-ketoDCA      | 112.57            | 114.18             | 98.27               | 109.26            | 104.77             | 99.86               | 97.15             | 96.85              | 92.66               |
| 3-ketoCA       | 111.01            | 115.27             | 91.65               | 85.12             | 92.14              | 90.81               | 86.57             | 109.82             | 99.95               |
| dehydroLCA     | 108.02            | 104.5              | 103.21              | 106.79            | 95.95              | 96.8                | 101.9             | 101.03             | 97.91               |
| allo-LCA       | 111.94            | 102.19             | 97.87               | 119.63            | 108.48             | 104.08              | 106.35            | 106.05             | 98.99               |
| iso-LCA        | 109.81            | 100.28             | 96.28               | 112.47            | 106.96             | 101.5               | 108.33            | 102.13             | 100.2               |
| 6-ketoLCA      | 91.95             | 89.84              | 107.63              | 115.89            | 109.67             | 102.99              | 114.11            | 91.17              | 100.4               |
| β-HDCA         | 78.36             | 103.2              | 106.71              | 99.64             | 117.34             | 103.2               | 78.53             | 114.25             | 104.06              |
| β-UDCA         | 103.44            | 97.97              | 104.71              | 102.39            | 116.74             | 101.68              | 100.54            | 104.77             | 102.83              |
| 7,12-diketolCA | 113.66            | 101.65             | 94.76               | 82.98             | 107.52             | 98.54               | 91.53             | 106.94             | 96.09               |
| 6,7-diketolCA  | 96.57             | 94.71              | 107.61              | 100.98            | 92.39              | 92.7                | 102.55            | 97.46              | 98.64               |
| 12-ketoCDCA    | /                 | 160.08             | 107.79              | /                 | /                  | 86.75               | 101.17            | 91.92              | 108.23              |
| ω-MCA          | 129.86            | 97.42              | 108.4               | 116.08            | 97.21              | 108.67              | 96.56             | 112.14             | 99.67               |
| β-CA           | 129.86            | 97.42              | 108.4               | 116.08            | 97.21              | 108.67              | 96.56             | 112.14             | 99.67               |
| isoDCA         | 115.24            | 119.44             | 104.85              | 121.33            | 118.39             | 102.19              | 111.77            | 111.52             | 102.62              |
| apocA          | 91.77             | 91.87              | 108.3               | 112.9             | 116.67             | 101.46              | 107.71            | 110.12             | 103.81              |
| muroCA         | 144.68            | 96.8               | 112.54              | 106.21            | 88.87              | 76.64               | 112.42            | 98.41              | 96.57               |
| DHCA           | 115.37            | 117.69             | 111.81              | 114.77            | 114.81             | 101.95              | 117.33            | 113.35             | 99.56               |
| UCA            | 120.94            | 119.32             | 103.95              | 95.97             | 81.61              | 101.63              | 108.49            | 106.86             | 108.58              |
| ACA            | /                 | 95.32              | 92.07               | 88.86             | 98.31              | 99.56               | 121.95            | 95.61              | 93.97               |
| GCA            | 113.93            | 108.52             | 103.51              | 107.98            | 104.59             | 100.74              | 106.47            | 102.43             | 97.55               |
| TCA            | 104.98            | 99.18              | 95.07               | 123.44            | 99.02              | 93.86               | 112.5             | 103.74             | 96.69               |
| GCDCA          | 122.59            | 102.59             | 104                 | 111.97            | 102.07             | 105.31              | 115.91            | 105.89             | 94.55               |
| TCDCA          | 82.91             | 105.81             | 90.82               | 95.83             | 110.7              | 89.04               | 87.11             | 113.5              | 99.37               |
| GHCA           | 111.34            | 107.04             | 106.3               | 116.73            | 97.64              | 98.41               | 95.52             | 96.35              | 100.23              |
| THCA           | 118.05            | 115.63             | 95.7                | 103.29            | 111.06             | 106.64              | 89.8              | 99.45              | 100.95              |
| GHDCA          | 120.8             | 89.25              | 105.68              | 113.94            | 81.81              | 98.25               | 97.6              | 96.76              | 96.4                |
| THDCA          | 99.52             | 119.11             | 100.88              | 91.93             | 108.09             | 100.98              | 97.12             | 98.21              | 98.43               |
| GUDCA          | 116.68            | 83.44              | 92.57               | 115.02            | 69.11              | 97.46               | 105.9             | 84.3               | 85.29               |
| TUDCA          | 111.81            | 108.34             | 100.27              | 85.32             | 93.51              | 85.39               | 114.26            | 103.09             | 101.09              |
| GLCA           | 108.5             | 64.54              | 113.02              | 87.43             | 85.1               | 108.93              | 99.58             | 83.82              | 92.7                |
| TLCA           | 78.09             | 104.48             | 94.63               | 111.6             | 111.22             | 98.74               | 68.73             | 94.89              | 97.28               |
| GDCA           | 122.28            | 112.24             | 109.13              | 112.1             | 100.03             | 100.58              | 111.14            | 96.35              | 98.19               |
| TDCA           | 104               | 113.02             | 94.37               | 96.85             | 117.43             | 107.37              | 105.94            | 103.58             | 97.4                |
| T-ω-MCA        | 121.22            | 107.95             | 100.72              | 105.76            | 103.73             | 101.7               | 108.94            | 98.58              | 100.1               |
| T-α-MCA        | 104.2             | 100.6              | 96.94               | 97.44             | 94.53              | 89.7                | 101.17            | 102.28             | 97.92               |
| T-β-MCA        | 99.11             | 102.74             | 98.63               | 94.14             | 98.63              | 92.29               | 87.5              | 108.79             | 97.62               |
| GDHCA          | 129.2             | 100.09             | 95.45               | 109.2             | 101.22             | 87.09               | 111.25            | 109.66             | 98.22               |
| TDHCA          | 113.67            | 115.4              | 100.19              | 110.68            | 102.85             | 98.19               | 87.86             | 103.6              | 98.19               |
| CA-3S          | 129.14            | 103.79             | 100.01              | 113.64            | 97.52              | 103.27              | 111.49            | 106.29             | 99.9                |
| CDCA-3S        | 115.54            | 83.22              | 102.01              | 94.91             | 83.67              | 109.81              | 87.86             | 103.64             | 101.5               |
| UDCA-3S        | 128.66            | 92.8               | 94.54               | 109.15            | 83.61              | 98.38               | 105.46            | 100.46             | 96.38               |
| LCA-3S         | 124.38            | 80.16              | 102.51              | 97.28             | 65.88              | 98.29               | 123.01            | 101.37             | 100.38              |
| DCA-3S         | 84.92             | 80.23              | 74.33               | 77.14             | 70.24              | 67.39               | 80.59             | 64.27              | 59.74               |
| GCA-3S         | 117.03            | 107                | 100.3               | 105.67            | 98.49              | 97.83               | 90.33             | 101.06             | 99.65               |
| TCA-3S         | 99.49             | 106.83             | 102.48              | 95.94             | 100.95             | 100.82              | 85.32             | 93.96              | 94.43               |
| GCDCA-3S       | 98.27             | 100.16             | 100.72              | 93.47             | 103.64             | 96.6                | /                 | 98.04              | 97                  |
| TCDCA-3S       | 110.65            | 103.87             | 98.31               | 96.02             | 98.18              | 96.17               | 209.48            | 76.6               | 95.36               |
| GUDCA-3S       | 114.45            | 107.33             | 99.58               | 116.98            | 107.93             | 98                  | 111.66            | 91.88              | 99.61               |
| TUDCA-3S       | 107.31            | 102.27             | 100.67              | 113.46            | 97.87              | 97.71               | 98.13             | 105.08             | 100.93              |
| GLCA-3S        | 95.97             | 116.6              | 106.8               | 107.13            | 112.23             | 100.82              | 128.59            | 98.96              | 97.02               |
| TLCA-3S        | 91.09             | 113.4              | 101.91              | 103.39            | 110.51             | 101.45              | /                 | 102.29             | 102.9               |
| GDCA-3S        | 113.57            | 111.4              | 100.28              | 115.35            | 115.14             | 99.23               | 155.48            | 104.78             | 109.7               |
| TDCA-3S        | 104.09            | 109.38             | 99.72               | 107.29            | 103.55             | 98.16               | 90.64             | 91.83              | 98.36               |

Supplementary Table 13 Intra-day accuracy (in RSD%)

|                  | serum             |                    |                     | urine             |                    |                     | feces             |                    |                     |
|------------------|-------------------|--------------------|---------------------|-------------------|--------------------|---------------------|-------------------|--------------------|---------------------|
|                  | STD-L<br>10nmol/L | STD-M<br>100nmol/L | STD-H<br>1000nmol/L | STD-L<br>10nmol/L | STD-M<br>100nmol/L | STD-H<br>1000nmol/L | STD-L<br>10nmol/L | STD-M<br>100nmol/L | STD-H<br>1000nmol/L |
| CA               | 12.65             | 4.21               | 1.19                | 8.45              | 2.97               | 4.23                | 7.88              | 3.03               | 4.34                |
| CDCA             | 1.52              | 1.19               | 0.58                | 3                 | 0.18               | 0.81                | 1.7               | 0.95               | 1.29                |
| $\alpha$ -MCA    | 1.85              | 7.5                | 1.78                | 2.77              | 4.32               | 3.07                | 9.63              | 2.33               | 2.88                |
| $\beta$ -MCA     | 6.48              | 6.73               | 1.23                | 2.01              | 3.59               | 3.85                | 7.52              | 2.71               | 0.86                |
| HCA              | 3.54              | 3.38               | 1.38                | 5.68              | 3.78               | 0.97                | 4.58              | 3.57               | 3.96                |
| HDCA             | 8.7               | 7.02               | 1.05                | 13.4              | 4.38               | 2.13                | 5.54              | 7.86               | 0.82                |
| UDCA             | 5.54              | 4.78               | 2.8                 | 8.71              | 4.82               | 1.25                | 9.42              | 7.8                | 0.78                |
| LCA              | 1.54              | 1.99               | 0.98                | 2.84              | 1.58               | 0.64                | 1.97              | 1.77               | 1.42                |
| 7-ketoLCA        | 15.41             | 9.82               | 1.95                | 6.01              | 14.3               | 1.76                | 13.95             | 8.01               | 0.99                |
| 12-ketoLCA       | 9.48              | 3.69               | 3.02                | 9.75              | 5.56               | 1.05                | 12.31             | 4.31               | 3.06                |
| DCA              | 0.65              | 0.73               | 0.58                | 2.32              | 0.59               | 0.35                | 1.01              | 1.1                | 1.2                 |
| 23-norDCA        | 12.7              | 10.79              | 2.52                | 4.88              | 4.73               | 3.35                | 17.95             | 6.45               | 3.18                |
| 7-ketoDCA        | 2.6               | 5.72               | 0.9                 | 4.67              | 3.27               | 3.84                | 6.54              | 0.96               | 0.77                |
| 3-ketoCA         | 1.98              | 2.49               | 2.64                | 9.86              | 2.25               | 2.64                | 7.72              | 4.7                | 3.03                |
| dehydroLCA       | 6.32              | 1.89               | 1.98                | 3.28              | 1.29               | 0.71                | 3.48              | 0.82               | 1.57                |
| allo-LCA         | 2.17              | 1.15               | 2.05                | 2.88              | 1.4                | 0.54                | 1.66              | 0.97               | 0.98                |
| iso-LCA          | 4.31              | 0.83               | 1.64                | 3.31              | 0.36               | 0.87                | 1.88              | 3.42               | 5.23                |
| 6-ketoLCA        | 4.88              | 6.14               | 1.78                | 7.54              | 11.35              | 6.29                | 35.3              | 9.06               | 2.7                 |
| $\beta$ -HDCA    | 17.39             | 16.5               | 1.51                | 19.7              | 9.4                | 0.81                | 4.64              | 6.98               | 0.3                 |
| $\beta$ -UDCA    | 7.32              | 7.29               | 5.49                | 10.42             | 5.1                | 2.94                | 6.44              | 6.31               | 1.03                |
| 7,12-diketolCA   | 9.07              | 3.54               | 2.74                | 2.86              | 6.76               | 3.55                | 7.94              | 6.48               | 1.36                |
| 6,7-diketolCA    | 12.79             | 3.14               | 0.95                | 8.16              | 5.22               | 3.96                | 6.62              | 10.68              | 2.75                |
| 12-ketoCDCA      | 16.48             | 10.18              | 3.73                | 10.36             | 6.57               | 6.29                | /                 | 24.52              | 4.3                 |
| $\omega$ -MCA    | 2.01              | 1.25               | 0.56                | 3.44              | 2.39               | 1.61                | 5.02              | 2.52               | 2.73                |
| $\beta$ -CA      | 2.01              | 1.25               | 0.56                | 3.44              | 2.39               | 1.61                | 5.02              | 2.52               | 2.73                |
| isoDCA           | 2.25              | 0.42               | 0.48                | 2.92              | 1.17               | 0.67                | 1.39              | 1.11               | 1.15                |
| apoCA            | 13.46             | 5.96               | 3.84                | 34.58             | 6.08               | 3.16                | 6.03              | 9.52               | 1.46                |
| muroCA           | 9.84              | 13.17              | 4.68                | 26.14             | 5.84               | 1.93                | 7.64              | 6.32               | 3.67                |
| DHCA             | 5.57              | 8.98               | 2                   | 2.03              | 3.09               | 2.88                | 15.16             | 5.9                | 3.33                |
| UCA              | 8.4               | 2.93               | 1.37                | 4.35              | 5.07               | 1.72                | 7.3               | 3.65               | 2.71                |
| ACA              | 8.47              | 3.18               | 1.62                | 7.72              | 7.56               | 3.83                | 4.54              | 9.77               | 3.92                |
| GCA              | 5.91              | 1.39               | 0.88                | 8.3               | 6.36               | 1.83                | 17.39             | 6.38               | 1.53                |
| TCA              | 3.4               | 2.97               | 3.6                 | 4.63              | 4.38               | 1.68                | 7.7               | 6.47               | 2.35                |
| GCDCA            | 8.03              | 3.73               | 2.06                | 12.55             | 3.27               | 1.13                | 4.74              | 4.26               | 0.91                |
| TCDCA            | 8.76              | 0.84               | 1.12                | 2.43              | 2.64               | 2.01                | 6.06              | 7.22               | 4.37                |
| GHCA             | 4.13              | 4                  | 1.6                 | 12.79             | 4.23               | 1.65                | 16.67             | 6.34               | 2.78                |
| THCA             | 2.7               | 2.59               | 0.94                | 5.36              | 1.96               | 1.12                | 5.99              | 5.92               | 4.16                |
| GHDCA            | 2.21              | 4.42               | 2.19                | 7.51              | 6.67               | 1.92                | 16.93             | 10.28              | 3.32                |
| THDCA            | 4.04              | 1.46               | 2.24                | 3.71              | 3.93               | 1.28                | 7.34              | 4.63               | 0.75                |
| GUDCA            | 4.9               | 6.01               | 3.01                | 6.78              | 4.2                | 1.4                 | 6.47              | 2.81               | 2.5                 |
| TUDCA            | 6.8               | 7.42               | 1.91                | 9                 | 1.6                | 3.16                | 6.7               | 3.81               | 3.07                |
| GLCA             | 11.29             | 4.3                | 2.44                | 8.45              | 5.25               | 0.99                | 4.96              | 2.9                | 1.62                |
| TLCA             | 44.17             | 2.62               | 1.1                 | 13.71             | 7.14               | 3.38                | 9.04              | 6.22               | 1.76                |
| GDCA             | 4.74              | 0.7                | 1.11                | 4.76              | 1.77               | 1.54                | 5.4               | 2.14               | 3.73                |
| TDCA             | 4.91              | 1.3                | 1.36                | 5                 | 0.63               | 1.84                | 4.2               | 1.76               | 3.03                |
| T- $\omega$ -MCA | 5.01              | 8.6                | 3.72                | 6.34              | 3.63               | 2.67                | 9.59              | 2.78               | 3.66                |
| T- $\alpha$ -MCA | 4.49              | 1.55               | 1.26                | 8.66              | 2.73               | 1.48                | 11.24             | 7.69               | 2.93                |
| T- $\beta$ -MCA  | 4.96              | 3.44               | 3.86                | 6.7               | 4.27               | 2.66                | 8.92              | 7.6                | 1.44                |
| GDHCA            | 13.51             | 1.88               | 1.22                | 12.19             | 3.25               | 0.78                | 11.54             | 6.27               | 2.97                |
| TDHCA            | 9.74              | 1.84               | 1.15                | 7.64              | 5.1                | 0.71                | 9.61              | 4.99               | 0.85                |
| CA-3S            | 9.29              | 1.79               | 0.78                | 4.93              | 1.07               | 0.71                | 9.7               | 3.26               | 1.08                |
| CDCA-3S          | 5.84              | 2.22               | 2.08                | 7.01              | 3.41               | 2.68                | 5.32              | 6.42               | 0.8                 |
| UDCA-3S          | 5.02              | 2.09               | 0.73                | 8.77              | 2.65               | 1.45                | 5.83              | 1.23               | 1.24                |
| LCA-3S           | 9.79              | 2.37               | 2                   | 7.25              | 7.19               | 2.8                 | 8.3               | 2.83               | 2.56                |
| DCA-3S           | 5.9               | 3.38               | 4.06                | 2.91              | 1.58               | 0.68                | 4.07              | 2.56               | 3.06                |
| GCA-3S           | 6.11              | 2.01               | 1.32                | 5.6               | 4.41               | 0.86                | 11.55             | 4.07               | 2.14                |
| TCA-3S           | 14.32             | 1.14               | 1.64                | 4.71              | 3.97               | 1.71                | 17.72             | 12.53              | 5.89                |
| GCDCA-3S         | 17.5              | 4.14               | 1.69                | 14.95             | 5.75               | 0.65                | 5.86              | 6.05               | 1.46                |
| TCDCA-3S         | 23.87             | 3.56               | 3.55                | 9.18              | 1                  | 2.34                | /                 | 2.86               | 3.15                |
| GUDCA-3S         | 7.56              | 5.28               | 1.23                | 7.59              | 4.55               | 1.08                | 7.16              | 2.05               | 3.82                |
| TUDCA-3S         | 4.53              | 3.61               | 1.21                | 8.27              | 3.65               | 2.81                | 14.9              | 1.69               | 4.39                |
| GLCA-3S          | 43.99             | 7.45               | 1.48                | 28.87             | 5.28               | 1.29                | 13.71             | 1.22               | 2.56                |
| TLCA-3S          | 27.3              | 2.72               | 3.54                | 9.02              | 7.52               | 3.29                | /                 | 8.31               | 6.69                |
| GDCA-3S          | 6.46              | 7.12               | 2.33                | 9.42              | 4.33               | 1.91                | 23.67             | 9.41               | 4.59                |
| TDCA-3S          | 11.82             | 1.36               | 1.63                | 6.17              | 3.06               | 0.43                | 13.13             | 6.8                | 3.14                |

Supplementary Table 14 Inter-day accuracy (in RSD%)

|                | serum             |                    |                     | urine             |                    |                     | feces             |                    |                     |
|----------------|-------------------|--------------------|---------------------|-------------------|--------------------|---------------------|-------------------|--------------------|---------------------|
|                | STD-L<br>10nmol/L | STD-M<br>100nmol/L | STD-H<br>1000nmol/L | STD-L<br>10nmol/L | STD-M<br>100nmol/L | STD-H<br>1000nmol/L | STD-L<br>10nmol/L | STD-M<br>100nmol/L | STD-H<br>1000nmol/L |
| CA             | 9.61              | 5.01               | 3.74                | 8.69              | 4.93               | 6.48                | 8.89              | 4.24               | 4.13                |
| CDCA           | 2.16              | 3.45               | 2.12                | 3.44              | 3.21               | 0.72                | 1.54              | 1.71               | 2.27                |
| α-MCA          | 4.58              | 5.28               | 2.24                | 8.91              | 5.57               | 2.63                | 7.75              | 5.64               | 4.48                |
| β-MCA          | 7.84              | 4.48               | 1.44                | 3.27              | 3.17               | 2.95                | 5.17              | 2.34               | 4.05                |
| HCA            | 4.17              | 4.53               | 2.8                 | 4.45              | 2.51               | 2.08                | 4.18              | 3.36               | 6.66                |
| HDCA           | 8.06              | 6.85               | 2.71                | 9.35              | 5.87               | 2.41                | 5.6               | 5.59               | 1.45                |
| UDCA           | 9.00              | 6.37               | 2.69                | 8.88              | 8.32               | 1.86                | 12.29             | 7.87               | 2.28                |
| LCA            | 4.44              | 4.96               | 1.19                | 3.3               | 3.3                | 0.89                | 2.84              | 2.02               | 2.28                |
| 7-ketoLCA      | 19.11             | 10.27              | 2.09                | 12.92             | 7.42               | 4.78                | 11.04             | 11.72              | 1.26                |
| 12-ketoLCA     | 15.49             | 8.82               | 3.26                | 13.08             | 6.79               | 1.76                | 13.25             | 8.24               | 3.82                |
| DCA            | 4.08              | 3.18               | 1.59                | 1.89              | 2.64               | 1.05                | 3.54              | 2.38               | 2.07                |
| 23-norDCA      | 20.35             | 11.95              | 3.24                | 12.96             | 9.69               | 5.92                | 18.07             | 9.04               | 3.15                |
| 7-ketoDCA      | 4.59              | 4.73               | 1                   | 7.83              | 4.22               | 3.98                | 7.65              | 1.98               | 1.17                |
| 3-ketoCA       | 14.11             | 3.66               | 2.09                | 5.91              | 4.54               | 2.61                | 10.48             | 4.25               | 4.99                |
| dehydroLCA     | 7.03              | 3.85               | 1.93                | 2.92              | 3.15               | 0.86                | 6.99              | 4.26               | 5.95                |
| allo-LCA       | 3.74              | 4.25               | 1.7                 | 3.2               | 2.46               | 0.77                | 2.86              | 2.14               | 2.96                |
| iso-LCA        | 4.26              | 4.06               | 1.39                | 3.52              | 3.06               | 0.81                | 2.86              | 3.87               | 3.74                |
| 6-ketoLCA      | 16.28             | 5.93               | 4.58                | 13.02             | 8.73               | 4.78                | 28.15             | 8.69               | 3.32                |
| β-HDCA         | 15.67             | 12.49              | 1.58                | 14.31             | 7.47               | 2.17                | 13.76             | 5.68               | 3.14                |
| β-UDCA         | 7.56              | 5.2                | 3.94                | 13.27             | 7.72               | 2.63                | 11.98             | 9.27               | 1.5                 |
| 7,12-diketolCA | 9.44              | 4.76               | 2.91                | 10.67             | 5.81               | 4.7                 | 13.96             | 4.07               | 1.61                |
| 6,7-diketolCA  | 11.63             | 8.42               | 0.93                | 8.35              | 9.17               | 4.04                | 6.55              | 6.81               | 2.98                |
| 12-ketoCDCA    | 11.42             | 7.97               | 6.01                | 16.74             | 10.1               | 6.12                | 23.49             | 19.97              | 3.9                 |
| ω-MCA          | 6.96              | 1.41               | 1.18                | 9.68              | 3.07               | 1.53                | 4.83              | 3.87               | 3.67                |
| β-CA           | 6.96              | 1.41               | 1.18                | 9.68              | 3.07               | 1.53                | 4.83              | 3.87               | 3.67                |
| isoDCA         | 3.8               | 1.25               | 1.37                | 2.55              | 1.96               | 0.73                | 2.24              | 0.99               | 2.8                 |
| apoCA          | 17.58             | 11.27              | 3.75                | 12.12             | 8.36               | 3.33                | 16.24             | 6.65               | 1.81                |
| muroCA         | 19.34             | 8.49               | 4.52                | 8.39              | 4.59               | 2.33                | 9.76              | 10.48              | 5.89                |
| DHCA           | 12.42             | 9.46               | 1.81                | 9.44              | 6.85               | 2.54                | 14.12             | 6.04               | 3.83                |
| UCA            | 7.98              | 5.74               | 1.56                | 6.17              | 7.09               | 3.16                | 6.12              | 3.97               | 5.46                |
| ACA            | 9.88              | 3.63               | 3.43                | 11.39             | 8.87               | 4.2                 | 9.6               | 11.69              | 6.08                |
| GCA            | 14.68             | 2.48               | 1.95                | 9.99              | 5.52               | 1.47                | 13.11             | 5.18               | 1.6                 |
| TCA            | 5.53              | 3.3                | 3.96                | 5.03              | 4.26               | 3.66                | 6.53              | 8.24               | 3.2                 |
| GCDCA          | 7.64              | 3.92               | 2.03                | 11.67             | 2.92               | 1.44                | 5.63              | 4.09               | 3.4                 |
| TCDCA          | 10.94             | 5.93               | 1.38                | 10.48             | 3.02               | 2.22                | 9.93              | 5.68               | 3.63                |
| GHCA           | 9.8               | 6.86               | 2.42                | 11.83             | 6.73               | 1.79                | 14.72             | 6.59               | 3.05                |
| THCA           | 11.12             | 2.74               | 1.89                | 4.8               | 2.05               | 2.33                | 6.73              | 5.53               | 3.45                |
| GHDCA          | 7.85              | 5.22               | 3.55                | 7.55              | 6.58               | 2.56                | 12.03             | 10.28              | 4.73                |
| THDCA          | 7.8               | 4.32               | 2.48                | 3.9               | 5.34               | 1.26                | 7.33              | 8.51               | 2.03                |
| GUDCA          | 6.32              | 5.02               | 2.71                | 4.75              | 6.21               | 2.37                | 4.95              | 3.06               | 3.59                |
| TUDCA          | 10.69             | 6.99               | 3.31                | 7.34              | 4.07               | 2.89                | 6.52              | 3.63               | 2.99                |
| GLCA           | 12.46             | 3.66               | 1.99                | 12.37             | 5.66               | 2.71                | 4.51              | 4.95               | 1.69                |
| TLCA           | 14.9              | 5.75               | 1.16                | 9.86              | 5.39               | 4.6                 | 12.58             | 4.84               | 2.97                |
| GDCA           | 8.67              | 3.36               | 1.85                | 3.78              | 2.68               | 1.07                | 4.91              | 3.61               | 2.8                 |
| TDCA           | 4.45              | 1.12               | 1.75                | 4.86              | 3.21               | 1.93                | 10.43             | 3.07               | 2.79                |
| T-ω-MCA        | 4.58              | 5.93               | 3.28                | 7.45              | 4.52               | 2.5                 | 8.08              | 7.67               | 2.9                 |
| T-α-MCA        | 5.85              | 1.58               | 1.24                | 9.41              | 5.33               | 2.23                | 12.51             | 6.2                | 2.4                 |
| T-β-MCA        | 4.59              | 4.07               | 2.97                | 5.84              | 4.66               | 2.25                | 7.25              | 7.18               | 2.34                |
| GDHCA          | 18.72             | 4.47               | 1.06                | 12.95             | 2.55               | 1.09                | 17.85             | 8.63               | 3.12                |
| TDHCA          | 7.59              | 3.78               | 1.47                | 13.17             | 5.04               | 1.35                | 10.1              | 4.41               | 1.58                |
| CA-3S          | 8.93              | 3.64               | 0.96                | 6.24              | 1.59               | 0.49                | 7.51              | 2.81               | 2.69                |
| CDCA-3S        | 5.5               | 2.06               | 2                   | 5.12              | 2.36               | 2.37                | 6.3               | 6.64               | 3.03                |
| UDCA-3S        | 4.8               | 1.31               | 0.82                | 11.67             | 2.52               | 1.32                | 8.35              | 1.49               | 1.5                 |
| LCA-3S         | 9.04              | 4.45               | 2.54                | 13.8              | 8                  | 3.38                | 9.25              | 5.5                | 2.78                |
| DCA-3S         | 4.89              | 3.64               | 4.97                | 3.33              | 4.07               | 2.09                | 5.66              | 2.84               | 2.83                |
| GCA-3S         | 14.72             | 4.21               | 1.72                | 7.19              | 3.61               | 1.42                | 12.87             | 5.06               | 2.14                |
| TCA-3S         | 10.06             | 4.73               | 2.59                | 5.77              | 4.42               | 3.07                | 11.82             | 9.66               | 4.87                |
| GCDCA-3S       | 10.14             | 5.65               | 1.36                | 12.84             | 7.49               | 1.69                | 17.17             | 5.19               | 1.98                |
| TCDCA-3S       | 15.55             | 3.86               | 3.82                | 13.9              | 3.6                | 2.69                | 45.02             | 6.02               | 4.09                |
| GUDCA-3S       | 10.27             | 6.16               | 1.6                 | 12.58             | 4.3                | 1.07                | 13.47             | 8.75               | 3.08                |
| TUDCA-3S       | 9.09              | 3.02               | 1.34                | 7.67              | 4.16               | 3.6                 | 14.2              | 4.95               | 3.59                |
| GLCA-3S        | 7.48              | 6.36               | 1.72                | 13.53             | 5.86               | 1.84                | 8.62              | 3.23               | 2.21                |
| TLCA-3S        | 17.84             | 2.92               | 3.53                | 12.29             | 9.93               | 4.82                | 28.34             | 13.66              | 5.42                |
| GDCA-3S        | 7.09              | 5.52               | 3.59                | 12.16             | 4.03               | 2.38                | 17.61             | 8.24               | 3.19                |
| TDCA-3S        | 11.54             | 1.14               | 1.7                 | 9.55              | 2.74               | 1.07                | 19.61             | 10.51              | 2.42                |



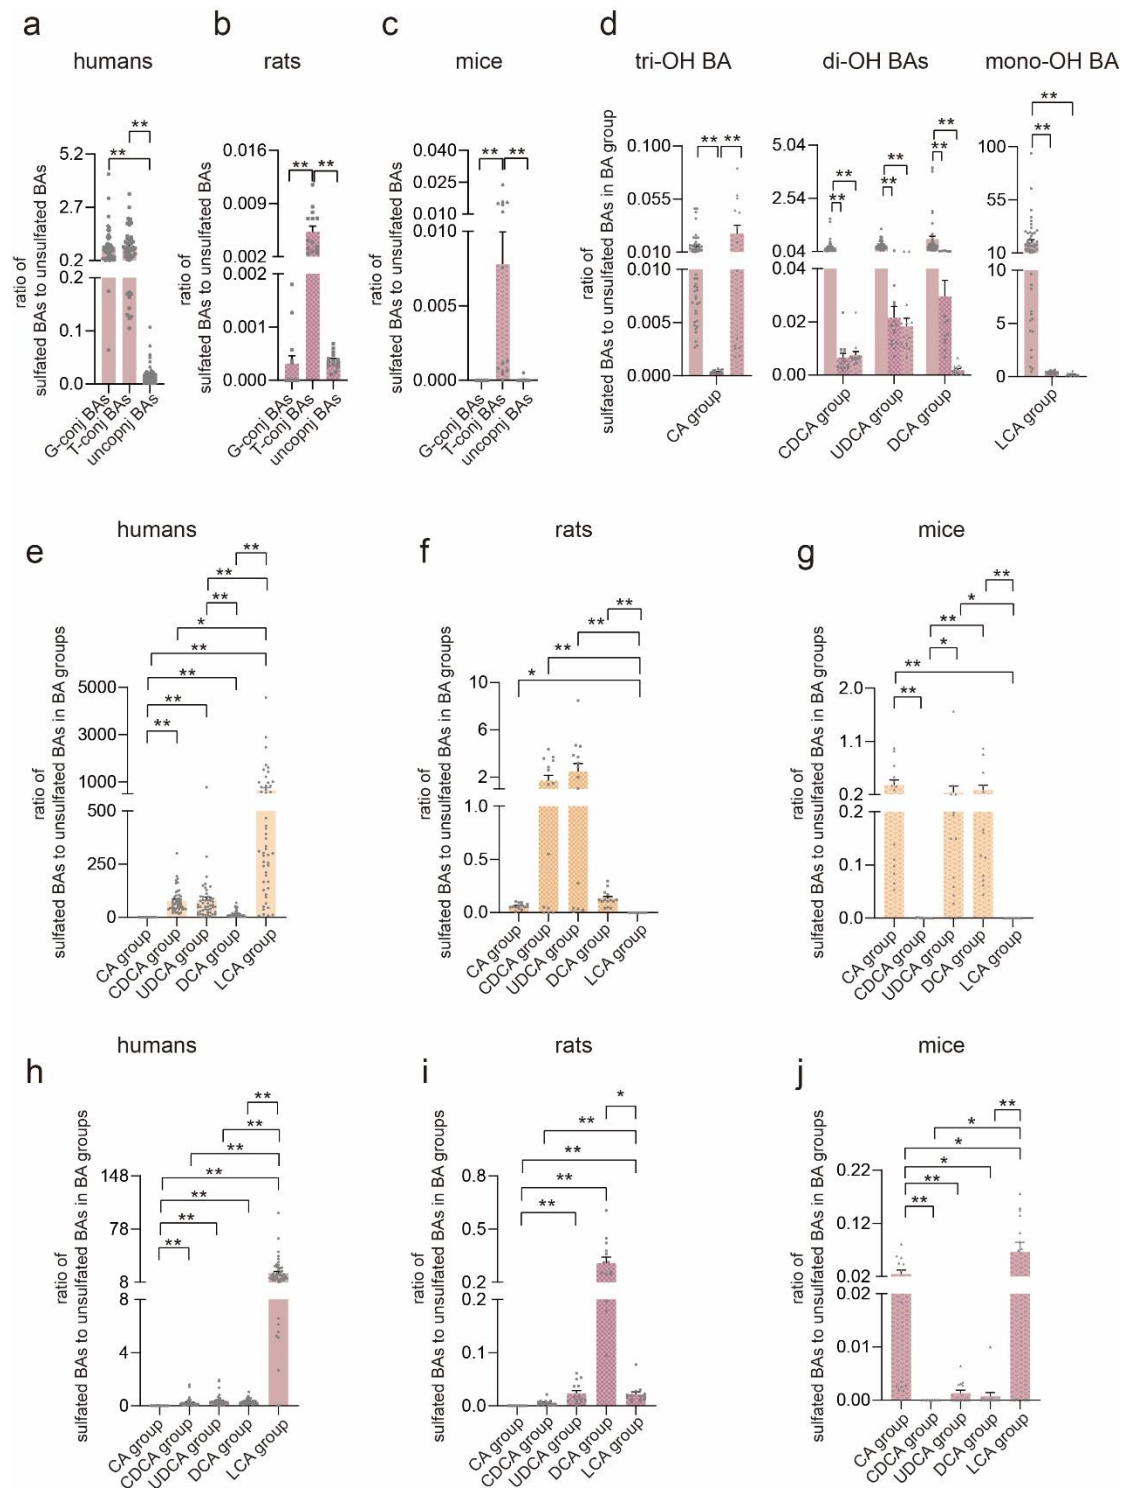

**Supplementary Figure 1. The ratio of sulfated BAs to BAs.** a-c The ratio of sulfated BAs to unsulfated BAs in humans, rats and mice urine. d The ratio of sulfated BA to unsulfated BA in BA groups among humans, rats, and mice urine. e-g The ratio of sulfated BA to unsulfated BA in humans, rats and mice urine. h-j The ratio of serum sulfated BA to unsulfated BA in humans, rats and mice serum. G-conj-BAs: glycine-conjugated BAs, T-conj-BAs: taurine-conjugated BAs, unconj-BAs: unconjugated BAs, tri-OH BAs:

trihydroxy BA, di-OH BA: dihydroxy BA, mono-OH BAs: monohydroxy BAs. CA group: the sum of CA, TCA and GCA. DCA group: the sum of DCA, TDCA and GDCA. CDCA group: the sum of CDCA, TCDCA and GCDCA. LCA group: LCA, TLCA and GLCA. \* indicates  $p < 0.05$ , \*\* indicates  $p < 0.01$ . Error bars depict the standard error of the mean (SEM).

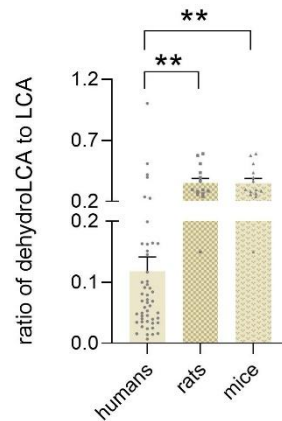

**Supplementary Figure 2 The ratio of dehydroLCA to LCA in feces.** Data are presented as the mean  $\pm$  SEM. \* indicates  $p < 0.05$ , \*\* indicates  $p < 0.01$ . Error bars depict the standard error of the mean (SEM).
