# Supplementary material for: Comparative profiling of serum, urine, and feces bile acids in humans, rats, and mice
Source: Commun Biol. 2024 May 27;7:641. doi: 10.1038/s42003-024-06321-3 (PMC11130135; doi:10.1038/s42003-024-06321-3)
Supplement: Supplementary file 2 — supplementary data 1 [file 42003_2024_6321_MOESM2_ESM.xlsx]

## Sheet: Fig 1
Fig 1c
	humans
CA	27.9369	208.94	47.298	72.0757	52.1961	36.2835	50.4472	163.39	19.4035	146.279	18.3374	30.9192	41.1527	358.383	315.888	212.047	34.5683	57.0354	29.2349	42.255	27.8844	370.767	83.9238	67.4919	17.495	70.3332	107.726	18.1977	22.6275	96.6591	377.726	427.244	23.6183	201.303	58.1617	151.829	133.164	114.865	238.599	52.308	369.378	57.0817	111.772	124.338	143.385	159.424	26.1743	181.991	47.8945
CDCA	146.492	608.975	93.7227	604.063	92.032	143.527	60.653	249.842	5.1182	367.026	122.246	161.636	60.3773	538.994	713.591	159.148	41.7049	267.309	170.341	35.4783	73.5204	604.064	692.914	578.979	229.556	86.4661	253.884	36.5483	99.7645	1221.84	386.678	1182.19	626.246	773.565	274.785	321.8	785.451	1026.28	229.941	577.373	1160.4	190.856	592.804	308.261	744.037	477.052	772.709	305.291	54.1082
α-MCA	0	0	0	9.6555	0	0	6.4338	0	7.8329	9.3076	0	0	0	0	0	6.3538	0	0	0	0	0	0	0	0	0	0	0	0	0	0	0	0	0	5.4564	0	7.5514	0	0	0	0	0	0	5.1458	0	0	0	0	0	0
β-MCA	0	0	0	0	0	0	0	0	0	0	0	0	0	0	0	0	0	0	0	0	0	0	0	0	0	0	0	0	0	0	0	0	0	0	0	0	0	0	0	0	0	0	0	0	0	0	0	0	0
HCA	4.325	11.1847	1.7647	32.8947	2.3136	3.7907	7.3153	11.7706	4.8774	22.8765	4.5308	2.9499	4.9105	51.6718	25.6928	15.8659	7.2812	15.2444	9.5921	14.9051	6.5543	27.6476	17.8376	8.0161	14.452	15.4588	38.8373	3.5461	1.5574	10.6779	28.7386	59.8877	17.3762	28.2465	9.4838	18.0333	40.724	23.0624	13.4776	5.9748	47.9658	13.2425	12.3172	37.6312	23.5725	16.2186	7.1011	23.1033	3.2668
HDCA	1.1616	1.2406	2.519	4.2429	7.3769	2.5788	13.7191	4.4944	21.6435	8.3173	6.5122	1.7712	3.2773	6.8174	7.1529	11.6281	4.0752	7.8905	1.2187	8.065	9.2914	16.4127	4.0282	2.0626	3.5343	7.7712	3.1954	10.4115	3.5126	2.1592	2.8733	6.5299	6.5299	6.5299	3.4396	4.6676	12.9491	7.5736	22.1467	4.5001	15.218	5.1492	17.8808	41.7184	6.5299	5.7533	14.741	12.9906	12.0474
UDCA	42.1904	58.4033	59.4753	119.496	90.6193	51.2337	68.5461	67.2758	93.5882	70.088	71.7367	60.6821	29.1465	274.493	204.162	161.149	22.4103	111.209	34.2546	23.1449	35.2256	136.993	177.712	169.324	37.7175	77.2378	36.3415	28.5063	40.6988	205.261	135.935	508.397	449.013	531.893	118.844	138.586	313.568	133.97	59.2865	136.561	423.698	87.6051	161.089	93.5882	281.706	178.713	124.509	202.751	45.0528
LCA	5.097	6.7474	15.2296	3.3302	31.124	11.7795	15.7065	4.6302	9.7027	14.8677	25.8623	31.3239	15.5033	24.9498	42.6538	33.6311	15.0246	18.6421	21.1087	21.9787	18.0221	20.6393	26.1847	3.6188	7.8858	13.7474	14.087	14.3354	7.9367	2.8528	15.8538	4.2538	1.6585	1.7879	17.4227	9.7518	62.0422	39.3338	34.3188	21.7567	4.3747	14.1102	47.5079	22.5821	21.4736	26.4819	43.0548	44.2405	25.7544
7-ketoLCA	1.7568	8.072	3.6902	9.7234	3.9336	2.8387	3.2833	6.6858	0	9.3701	1.6734	1.7729	0	16.1729	17.4515	8.6652	0	16.4988	2.2091	2.3399	2.9227	12.9185	17.086	7.9738	0	1.2301	1.48	6.2712	2.3511	7.6772	8.0405	24.3186	23.8748	11.8272	22.9207	6.2712	13.647	9.0833	2.095	5.6747	15.751	4.6222	23.9219	6.0002	13.2039	7.0157	3.4644	13.4298	0.5652
12-ketoLCA	5.8413	6.3206	8.6546	0	58.9214	6.5025	46.1236	7.1408	14.1695	19.0515	11.0559	10.2131	6.8362	15.5069	20.9391	25.8083	6.8461	6.3424	0	8.7531	9.0016	26.7109	12.1257	0	0	10.1863	0	10.258	0	0	9.7071	0	0	0	11.1811	0	27.0054	70.3948	10.6556	6.2986	0	5.1336	45.5918	9.0852	6.7886	11.2316	17.1557	23.9198	10.3577
DCA	178.658	409.962	408.523	54.7946	1049.98	232.63	484.968	421.791	207.2	488.654	613.838	377.742	210.331	1088.8	843.759	777.422	145.907	232.022	122.724	301.182	188.32	876.107	626.185	19.1446	69.8766	290.38	188.811	99.3136	146.125	85.7278	289.031	103.733	15.6161	16.9349	342.769	319.518	870.769	1345.06	413.942	541.186	1.7036	248.664	1638.18	262.258	792.999	627.054	861.132	715.374	475.789
23-norDCA	3.4727	1.5643	1.9612	3.4727	4.3945	2.2683	6.6852	4.3658	6.0656	3.5051	5.3903	3.4727	3.9505	2.4238	5.883	12.4263	3.4727	2.9711	3.4727	2.9601	4.5005	6.9665	2.4574	3.4727	0.6761	2.1953	3.4727	5.8373	3.4727	3.4727	1.7336	3.4727	3.4727	3.4727	0.6714	3.4727	7.1074	5.773	2.7924	3.4727	3.4727	3.4727	10.07	2.8209	4.5867	3.2922	2.6309	4.8869	2.4919
7-ketoDCA	0	0	0	0	0	0	0	0	0	0	0	0	0	0	0	0	0	0	0	0	0	0	0	0	0	0	0	0	0	0	0	0	0	0	0	0	0	0	0	0	0	0	0	0	0	0	0	0	0
3-ketoCA	0	0	0	5.0204	0	0	0	0	0	0	0	0	0	5.8311	0	0	0	0	0	0	0	0	5.8178	7.4375	0	0	0	0	0	0	5.2687	8.7304	0	7.3508	0	0	0	0	0	0	11.113	0	0	0	0	0	0	0	0
allo-LCA	0	0	0	1.1291	6.268	0	1.5707	0	20.9428	3.0251	0	5.3827	1.1496	0	8.0918	8.1008	1.1291	0	0	1.2752	2.4347	2.4807	0	0	0	2.6244	0	3.0768	2.0171	0	0	0	0	0	0	0	5.9379	5.435	1.5768	0	0	0	8.2306	1.1086	1.7401	3.1679	3.6195	3.3167	4.9702
iso-LCA	5.2094	2.374	21.3683	1.5665	21.2614	10.5062	16.1514	4.2444	17.6097	28.9732	28.4345	37.2891	24.0779	24.5988	84.0579	87.3625	13.1533	27.3736	9.0408	29.7744	38.8944	40.5289	13.6906	0	1.9783	39.0702	11.8387	21.0907	9.8868	1.9326	24.1844	4.5136	0	0	23.4376	19.1408	143.915	61.8308	53.532	27.3476	0	12.1088	133.657	24.8742	37.7676	89.4444	88.7757	70.2213	41.2934
6-ketoLCA	2.7367	2.9714	2.5918	3.0041	2.9416	2.4258	2.8944	2.1352	3.285	3.6434	4.2337	4.6044	2.4983	3.2678	2.9713	2.2373	2.3118	4.5815	3.3311	3.1999	2.8023	3.2999	3.6233	3.4929	2.9526	3.5985	2.6622	3.4864	2.5954	2.3669	4.0788	3.6392	2.7745	3.1581	2.4694	3.0543	5.4315	4.7867	4.5643	4.2796	3.3974	2.8847	3.7191	4.1848	3.2661	4.2261	3.6532	3.0824	2.9596
beta-HDCA	0	0	2.6819	0	5.6281	1.0597	12.4631	2.4352	23.2548	4.3491	4.0702	7.0893	2.1753	1.4078	5.4094	7.7436	3.0232	4.6651	1.0497	2.8153	6.9172	11.5406	2.3393	3.7454	3.7454	3.4659	4.808	7.8078	1.8261	3.7454	5.187	3.7454	3.7454	3.7454	3.0717	2.5725	10.4229	3.3845	2.7773	1.4335	1.6104	4.2452	8.6986	3.1405	2.637	8.7967	9.1513	5.9208	4.0249
beta-UDCA	139.907	73.741	163.984	235.532	55.6073	168.855	85.3962	52.3757	52.8501	49.3888	294.567	116.622	80.5466	376.311	251.868	296.337	124.984	393.671	38.6745	48.0436	84.0806	147.233	269.114	441.047	46.3668	168.195	75.5724	30.6818	62.2377	466.604	423.85	1774.79	1297.84	1816.16	915.339	474.15	487.487	116.987	197.274	298.928	800.119	519.325	116.153	212.032	261.674	411.201	181.705	373.305	79.5669
6,7-diketoLCA	0	0	0	0	0	0	0	0	0	0	0	0	0	0	0	0	0	0	0	0	0	0	0	0	0	0	0	0	0	0	0	0	0	0	0	0	0	0	0	0	0	0	0	0	0	0	0	0	0
12-ketoCDCA	0	0	0	0	0	0	0	0	0	0	0	0	0	0	0	0	0	0	0	0	0	0	0	0	0	0	0	0	0	0	0	0	0	0	0	0	0	0	0	0	0	0	0	0	0	0	0	0	0
ω-MCA	2.4182	4.0349	1.2332	7.3673	2.425	2.2705	5.0842	6.1617	1.9625	4.542	1.8167	1.5956	2.2355	5.5286	5.3306	6.533	2.8959	3.0616	3.9638	2.2419	1.6851	20.0168	5.132	6.4374	2.9524	3.08	3.1246	1.0724	0.4361	5.7842	7.2147	14.6667	3.7577	15.5865	5.5035	7.7426	6.9539	7.8743	3.4065	2.4609	12.6082	3.5391	5.2183	3.9638	5.7426	5.7178	1.5541	6.4991	1.7309
muroCA	0	0	0	0	0	0	0	0	0	0	0	0	0	0	0	0	0	0	0	0	0	0	0	0	0	0	0	0	0	0	0	0	0	0	0	0	0	0	0	0	0	0	0	0	0	0	0	0	0
UCA	0	0	0	0	0	0	0	0	0	0	0	0	0	0	0	0	0	0	0	0	0	0	0	0	0	0	0	0	0	0	0	0	0	0	0	0	0	0	0	0	0	0	0	0	0	0	0	0	0
ACA	0	0	0	0	0	0	0	0	0	0	0	0	0	0	0	0	0	0	0	0	0	0	0	0	0	0	0	0	0	0	0	0	0	0	0	0	0	0	0	0	0	0	0	0	0	0	0	0	0
GCA	126.294	531.169	143.675	1212	263.358	165.29	392.008	106.811	47.3374	233.243	66.2532	163.206	65.3167	439.656	280.286	160.673	99.3977	134.037	127.451	599.391	40.8234	35.6168	460.99	426.308	16.3259	139.507	85.0936	39.8643	47.1942	91.3289	74.2676	126.204	196.573	200.155	153.465	355.068	662.937	226.242	94.4029	255.275	158.867	237.225	371.028	170.564	120.323	128.472	112.282	137.308	216.318
TCA	15.6427	50.9649	28.182	36.0547	44.8324	75.876	127.419	23.2341	4.9711	23.4798	4.955	28.4191	7.2414	62.5983	19.7939	15.4613	12.9413	12.3237	7.6044	120.261	9.2676	7.8501	64.6225	61.3151	5.943	10.3249	16.6767	18.722	9.4465	10.713	5.8911	14.9313	46.5056	49.6438	25.7249	58.6395	42.3512	11.0095	10.1285	23.9413	8.576	37.1307	18.1111	10.2072	7.0992	6.1921	19.4722	11.2688	25.959
GCDCA	541.443	905.152	501.324	5890.08	968.43	523.569	1029.92	707.031	95.9371	870.665	366.873	426.126	311.009	2202.94	2674.06	807.987	638.452	950.77	1361.17	1476.94	250.254	713.792	2814.47	821.011	197.39	564.477	475.947	126.026	181.035	598.756	488.531	643.992	1679.62	1049.86	645.218	1775.78	2482.34	1426.86	648.076	938.048	531.051	412.772	1185.78	1217.41	387.658	562.716	617.249	528.751	851.203
TCDCA	47.5883	75.1948	46.6101	118.842	100.152	100.9	276.248	81.8135	6.2835	120.903	13.1318	45.8719	13.9824	272.035	145.099	54.0228	54.3331	75.9777	65.1676	242.776	31.5369	58.5285	276.43	80.2126	26.302	28.1815	54.1058	22.5932	13.1885	74.5618	31.8553	55.459	233.814	123.256	112.219	289.988	195.425	65.2034	18.2381	76.8381	22.4676	45.5879	54.9444	73.6096	12.9045	10.3687	87.6575	31.9808	80.6977
T-α-MCA	0	14.2413	11.7161	0	11.8637	8.957	13.6151	9.6573	9.28069	19.2257	9.7363	9.921	7.7033	7.5287	6.6165	9.9263	16.3768	6.1961	0	10.8028	9.6441	11.7534	8.6092	0	0	0	13.5507	11.8637	5.1253	0	0	0	0	7.5287	0	3.9338	15.1765	7.2857	0	0	0	5.0064	14.6332	5.9069	0	0	15.4768	0	10.6582
T-β-MCA	0	10.3913	0	0	0	0	0	0	0	0	0	0	0	0	0	0	0	0	0	0	0	0	0	0	0	0	0	0	0	0	0	0	0	0	0	0	0	0	0	0	0	0	0	0	0	0	0	0	0
GHCA	8.6258	18.351	11.504	96.8865	7.5282	12.9083	20.6219	2.9019	39.3537	30.4262	10.3077	20.7369	4.3638	13.7618	20.4563	12.8842	18.6497	15.1105	24.9551	28.8661	14.0651	2.8785	26.6899	11.095	10.502	18.4747	23.8532	8.2954	14.1368	2.2382	3.4932	22.7977	50.0617	18.2188	12.2418	17.5353	48.2173	19.0723	5.774	30.1486	10.1251	9.6125	25.4678	35.4788	10.8236	17.7629	27.9631	8.1316	23.9369
THCA	0	0	0	12.4045	6.1964	0	7.218	0	0	0	0	0	0	0	0	0	0	0	0	0	0	0	0	0	0	0	0	0	0	0	0	0	0	0	0	0	5.6956	0	0	0	0	0	0	0	0	0	0	0	0
GHDCA	3.4337	4.2791	4.7805	26.4316	3.6251	4.7098	3.7389	3.7262	3.2177	4.2633	5.441	4.4609	1.9131	9.353	13.0758	6.7062	4.6031	6.8224	3.3853	4.3375	1.4765	6.0023	15.9874	7.0894	1.5937	5.5759	2.6975	0	1.1468	4.6199	6.0171	12.6598	44.3606	19.5231	4.2712	15.4692	24.3744	5.0492	3.6583	7.7346	5.3408	5.0437	6.7671	45.1357	3.187	7.3671	3.4117	3.8222	6.1659
THDCA	0	1.6614	0	2.5062	2.1447	1.7622	2.2211	1.8243	1.1826	2.3139	1.3311	1.2094	0	1.788	1.8297	1.8847	0	1.3721	1.3477	1.698	0	2.1895	1.7876	1.3893	1.3344	0	0	1.6543	1.2751	1.3278	0	2.3916	0	0	0	0	0	0	1.4147	1.7489	0	1.5569	1.4966	5.4058	0	1.3592	1.4912	1.335	1.3709
GUDCA	50.6818	36.8667	73.4306	523.727	56.1005	59.1651	50.1032	51.7847	6.1111	44.4626	83.9093	45.4488	22.7213	208.202	222.932	66.8239	77.3264	131.375	45.7864	42.487	9.6043	62.9099	230.441	101.49	15.8131	72.2816	31.7679	4.638	15.0753	65.7714	63.5434	191.778	833.708	354.667	64.9492	232.137	576.359	64.7547	55.3579	145.261	99.9519	79.9453	91.4103	161.708	91.8854	117.331	54.2881	70.5295	42.2473
TUDCA	4.0383	1.3516	1.9633	31.0051	13.3868	2.2109	3.0428	1.441	0	2.0539	1.7471	2.0383	0	8.1498	5.6591	0	2.1492	3.3252	0	1.6525	0	0	4.1461	2.3741	2.0572	0	0	0	0	1.196	1.158	4.8507	27.2344	9.8199	4.298	7.766	18.0042	1.1618	0	6.2678	3.013	2.9879	0	2.6884	0	0	1.5319	1.0744	1.117
GLCA	1.6024	0	12.7479	0	13.0177	7.691	8.0489	0	1.6289	6.0013	7.0411	14.6009	11.1714	9.8695	24.0869	26.6513	2.5014	7.5708	8.4276	4.5123	8.1458	17.5514	18.9114	0	0	3.113	1.4547	1.6726	3.6127	0	2.5976	0	0	0	2.35	11.6233	26.634	15.1272	24.0871	14.2495	0	0	19.4851	5.1498	3.955	5.6949	19.2295	34.8873	14.5504
TLCA	0	0	0	0	9.6036	1.4943	2.922	0	0	1.2621	1.0397	1.099	0	0	2.92	2.0013	0	0	0	1.5932	0	1.447	1.5588	0	0	0	0	0	0	0	0	0	0	0	1.0595	1.5287	2.2793	1.357	0	1.2853	0	0	2.1871	0	0	0	2.239	1.1922	1.3279
GDCA	86.3228	208.593	283.237	180.769	465.198	198.954	755.749	375.599	121.975	358.214	307.079	238.334	190.901	536.901	903.291	603.031	393.863	236.778	164.095	664.824	96.4847	383.55	828.5	16.8376	18.2326	149.214	134.429	42.9691	70.2897	21.609	93.9139	34.2512	15.9034	15.6505	103.774	458.45	1125.96	718.797	223.429	338.064	223.429	149.473	1049.7	239.688	177.146	222.909	260.755	175.455	586.181
TDCA	10.4789	23.6664	36.8901	37.9902	45.5611	55.96	38.5437	51.5749	18.2349	70.1055	14.0002	25.317	12.3193	55.8934	48.0896	49.9546	36.7842	25.1244	11.602	115.008	16.1871	38.3726	82.174	20.2155	6.4832	40.9522	19.7137	12.4931	14.7775	10.6651	13.7374	7.6675	22.867	22.7481	41.9204	81.8846	66.2733	34.8066	10.8444	34.4314	25.317	16.2898	58.753	18.9672	13.9131	18.3047	47.3608	17.767	84.2906
T-ω-MCA	0	32.4842	0	26.0421	0	0	24.6036	0	0	0	0	0	0	0	0	0	0	0	0	0	0	0	0	0	0	0	0	0	0	0	0	0	0	0	0	0	0	0	0	0	0	0	0	0	0	0	0	0	0
CA-3S	0	0	0	0	0	0	0	0	0	0	0	0	0	0	0	0	0	0	0	0	0	0	0	0	0	0	0	0	0	0	0	0	0	0	0	0	0	0	0	0	0	0	0	0	0	0	0	0	0
CDCA-3S	0	0	1.5785	0	0	1.054	1.5785	2.1885	1.5785	2.0507	1.2297	1.0384	0	11.9529	5.8055	2.3887	2.872	1.8715	5.69	0	1.1086	5.163	4.8756	1.3425	0	1.2704	1.4814	0	0	1.39	6.0438	4.805	1.8553	1.9186	1.5785	1.0047	5.2166	6.7608	1.5026	1.5739	22.4572	2.4798	2.6703	3.8154	4.782	2.7654	0	5.7193	0
UDCA-3S	0	1.1777	1.0435	1.7602	0	1.0046	2.1257	1.9261	0	1.2767	1.5302	1.1762	0	5.2369	2.2539	2.0762	1.866	1.6837	1.0575	0	0	2.9955	2.8045	2.791	0	2.0663	1.3292	0	0	3.0868	4.4688	4.6983	7.1346	6.1626	1.3345	2.5154	8.1821	1.6917	2.5315	1.4427	16.0737	2.2976	2.5698	2.057	6.3291	2.7391	1.9898	6.0996	0
LCA-3S	1.5832	1.7057	3.3463	0	15.2836	7.5543	18.5249	9.4455	7.7121	13.5193	12.1047	7.3374	4.2237	26.2194	96.3391	81.1914	34.7672	13.9028	16.375	5.4102	5.4974	145.882	18.5324	0	1.0759	9.9753	5.3011	3.3882	3.4343	0	23.041	2.4739	0	0	1.1228	3.7744	50.3406	53.1978	27.2954	8.6325	0	4.33	56.2651	11.5872	26.0888	10.6205	16.9321	21.9178	12.9934
DCA-3S	0	0	0	0	2.85491	1.38217	5.34798	2.66849	1.28187	2.59633	2.75969	0	1.17396	4.52951	3.25568	5.41442	5.28132	1.27404	1.5997	0	0	10.9008	2.63865	0	0	1.12	0	0	0	0	2.43086	0	0	0	0	0	5.1715	8.88466	1.70994	1.24505	0	1.34324	4.06589	1.64794	3.86551	1.97719	1.5487	4.61923	2.20022
GCA-3S	1.5957	1.1875	1.1766	2.4183	1.8787	1.4842	10.5677	0	2.4175	1.9609	1.0641	1.2432	0	1.6558	0	1.577	4.4035	1.2622	1.6335	1.9317	0	0.942	2.5574	6.2652	0	2.6447	2.2599	2.4957	0	1.8475	2.1215	1.9698	2.7898	1.3404	1.2389	1.6555	4.7947	3.8092	1.5643	1.7937	4.6885	2.1495	3.1806	2.8591	2.2133	2.5942	1.6304	1.6386	1.3839
TCA-3S	1.0674	2.2831	1.0468	1.1067	1.2309	1.054	3.2972	0	0	1.0454	0	1.0614	0	1.1073	0	1.0923	1.2566	0	0.9208	1.1845	0.9712	0	0	1.2211	1.034	1.0163	1.1714	1.1024	0	1.0157	0	0	1.1659	0	0	0	0	1.0068	0	0	1.0146	1.006	0	0	0	0	1.2916	0	0
GCDCA-3S	81.1917	136.2	103.181	397.107	68.9488	182.124	276.057	57.7441	151.844	219.413	78.24	143.594	32.2488	225.23	158.958	115.928	329.985	100.655	326.361	174.182	116.081	82.8101	295.871	248.549	93.4322	411.221	283.411	236.977	125.111	114.98	162.152	348.041	493.013	207.461	97.8221	152.048	366.354	232.459	159.378	212.895	566.102	187.704	243.559	282.437	194.242	166.027	194.642	152.019	145.571
TCDCA-3S	9.5889	7.8251	7.3047	32.9909	11.1434	19.0728	43.346	6.236	17.0555	12.7646	6.5914	11.0143	4.2545	19.6108	8.757	9.567	31.1229	8.1506	16.0541	16.5086	19.1452	8.1112	12.1423	15.1761	9.3083	17.3545	31.5004	26.9909	11.9701	8.9065	9.4529	20.348	34.4681	13.7798	13.3483	13.3325	16.9443	10.333	8.8249	14.5827	21.5786	12.3428	11.0577	18.6183	9.2009	6.4136	18.3382	9.6673	10.2926
GUDCA-3S	26.2586	17.016	31.6401	52.9907	15.1022	42.0852	78.2989	23.3914	13.1475	32.561	23.3968	24.9353	6.9648	107.535	35.0974	29.8351	66.7253	45.7585	18.9832	11.5113	11.1141	33.7925	69.3001	132.072	35.0695	75.1546	34.7411	31.7581	14.4261	93.069	91.9684	232.942	700.089	165.267	24.422	133.111	210.112	38.6714	38.5624	40.6376	289.623	84.9193	56.0827	86.6706	106.099	86.0847	30.0682	56.1938	23.5849
TUDCA-3S	2.0614	1.3631	2.5603	2.9281	1.7812	3.4763	8.699	1.543	1.4516	2.2548	1.4618	2.0682	1.1058	5.488	1.6662	1.6431	4.451	2.0652	1.3612	1.3988	1.7403	2.3508	2.298	6.3585	3.0513	2.6949	3.3724	2.8908	1.6154	4.7692	3.5184	7.8829	28.2004	7.1067	2.7519	6.8139	6.4302	1.6035	2.107	2.2942	7.4261	3.5629	1.8079	3.5379	2.7025	1.8074	2.2621	2.0114	1.7581
GLCA-3S	71.3347	83.5099	377.239	29.3815	406.619	243.888	505.132	101.259	440.674	530.389	407.501	449.438	133.103	231.518	722.633	594.92	1360.27	308.865	484.507	455.541	343.175	492.663	351.441	9.6709	26.6864	950.256	484.013	465.932	234.07	18.7156	317.378	45.8175	0	0	86.8952	202.23	2132.92	1222.02	912.637	489.531	0	200.359	1689.53	567.92	736.807	331.055	891.092	423.82	610.426
TLCA-3S	16.2536	7.0917	76.7025	7.7899	133.375	104.25	206.144	30.4679	96.7518	98.6853	52.0457	90.4279	10.9427	36.192	87.2565	100.549	342.762	25.3178	91.4668	53.6963	116.923	135.097	32.6156	0	12.6237	147.038	171.102	151.009	76.7301	0	41.3877	8.7984	0	0	21.2713	31.7824	218.534	81.8912	53.7774	63.2912	53.7774	32.5814	203.716	47.3805	35.8788	23.7975	159.139	47.06	145.507
GDCA-3S	44.4474	59.7741	243.265	27.1602	417.452	193.32	947.346	93.5591	444.626	304.659	208.774	261.906	71.3226	129.439	156.641	291.821	1052.08	91.1554	130.95	222.808	133.834	260.021	283.154	0	25.46	308.342	178.212	258.785	167.997	15.6875	108.576	47.6687	0	0	56.9299	107.326	651.442	670.533	207.422	239.725	0	144.076	750.152	185.848	262.279	213.461	316.605	242.019	306.998
TDCA-3S	4.2714	4.0398	14.242	3.4737	38.7878	18.0315	96.3507	7.7697	25.1151	13.3084	9.158	14.7774	4.9231	9.3988	6.2056	13.6391	57.3679	5.1307	6.4078	12.5453	13.9125	19.7919	9.815	2.1135	4.1023	11.8365	13.4181	27.9988	13.279	3.1117	7.4766	4.3377	2.1033	9.3988	5.9019	8.4767	19.229	16.3504	6.4743	11.0329	2.1106	8.0946	18.8612	7.4733	5.9429	4.6359	20.6779	7.2928	17.2117
Fig 1d
	humans
CA	14.844	9.47531	37.8516	51.0894	29.0483	8.37149	18.5167	68.2476	21.8978	0.682589	100.684	30.6168	6.7567	30.7261	78.8036	13.2115	6.5484	25.6184	1.38411	7.07116	1.72447	8.19297	0.803176	6.81288	65.9568	13.202	31.2014	4.15857	85.8711	8.81097	11.3103	97.7766	18.8839	67.2183	0	58.455	1.42201	8.42777	3.18918	5.0843	4.41389	0.427093	0.572283	15.3986	6.67073	1.37271	0.838252	10.2271	10.2739
CDCA	0	0	0	0.518784	2.36812	0	0	0.468628	0	0	0	0.687036	0	1.22258	0	0	0	0.534627	0	0	0	0.188869	0	0.208156	1.66085	0	0	0	2.37811	0	0	1.6717	0.111265	2.04718	0	0.375146	0	0	0	0	0	0	0	0.420419	0.151724	0.0915256	0	0.167894	0
α-MCA	0.298343	0.239295	0.382358	0.761291	0.266313	0.652096	0.808112	0.827021	0.503385	0.334128	1.45934	0.250288	0	0.203025	0.951187	0.236591	0.366094	0.242697	0.395828	0.198459	0.208437	0.146192	0.422964	0.331089	0.715692	0.294086	0.234936	0.309851	0.232108	0.211417	0.362576	0.787126	0.421108	0.525395	0	0.79411	0.178188	0.113029	0.288037	0.132444	0.147454	0.10334	0.139631	0.124286	0.217378	0.138424	0.173532	0.21479	0.121336
β-MCA	0.923139	0.8174	2.82198	4.4989	1.4198	2.16067	1.4587	3.56349	0	0	3.28002	1.23234	0	0.681012	8.65588	0.994619	0.612429	0.691548	0.307159	0.83548	0.452876	0.925134	0.564777	1.92354	2.31944	1.02028	0	0	7.36108	0.753665	0.419792	2.91418	1.82334	5.16251	8.75157	2.92073	0	0.503717	0.387099	0.355988	0	0	0	0.872256	0.731691	0.659999	0.537896	3.53252	0.863357
HCA	0.297952	0.311758	0.718824	0.590165	0.307556	0.799194	0.500648	0.760861	0.689662	0.549529	0.970707	0.441842	1.46034	0.377476	1.4479	0.359295	0	0.439732	0	0.214398	0.173677	0.0760919	0.231637	0.458112	0.374045	0.300278	0.209685	1.5177	0.262984	0.351856	0.183408	0.378737	0.346189	0.611403	4.02539	1.32239	0.507391	0.291596	0.193425	0.157622	0.181746	0.112726	0.0646415	0.154593	0.152451	0.140382	0.317503	0.283518	0.153155
HDCA	0.322693	0.320901	0.575735	0.311667	0.117292	0.600699	0.451758	0.465037	2.46711	0.446559	0.524193	0.185066	1.55699	0.123514	0.269669	0.39849	0.136611	0.261156	1.17557	0.221193	0	0.0935417	0.169472	0.385522	0.169884	0.185906	0.194544	0.396088	0.189849	0.137627	0.132605	0.166881	0.139744	0.302058	1.76539	0.575492	0.359156	0.111387	0.151179	0.121043	0.0743827	0.0761557	0.0568794	0.101851	0.185385	0.103474	1.05861	0.245851	0.174717
UDCA	0.68958	0.295446	0.726326	0.701682	0.672475	0.811768	0.987569	0.730217	1.05453	0.584137	1.31937	0.65523	2.26583	0.958202	0.68049	0.574987	0.363592	0.530294	0.632169	0.348182	0.259189	0.181961	0.733379	0.38319	0.81176	0.270472	0.421926	0.762229	0.932416	0.492182	0.283988	0.872894	0.449755	1.17362	3.35899	0.98109	0.536133	0.348438	0.234129	0.152365	0.187616	0.117685	0.16218	0.414569	0.296713	0.521652	0.406981	0.53094	0.200667
LCA	0.453812	0.219707	0.441138	0.231592	0.181996	0.466174	0.518229	0.240215	0.508462	0.266833	0.674076	0.202656	1.08916	0.214817	0.293702	0.39356	0.230241	0.247767	0.275553	0.2002	0.124148	0.1462	0.237425	0.205312	0.211944	0.161045	0.2763	0.433915	0.135345	0.144976	0.161416	0.162036	0.136626	0.230692	1.58955	0.316028	0.26015	0.184501	0.132535	0.140011	0.0914738	0.0460111	0.0730087	0.0773481	0.154516	0.0940949	0.161087	0.115162	0.0846924
7-ketoLCA	0	0	0	0.462477	0.704323	0	0	0.252697	0	0	0	0	0	1.17071	0	0	0	0.256557	0	0	0	0.14936	0	0	0.640417	0.113487	0.179938	0	0.546191	0.219601	0	0.889291	0.18664	0.627545	0	0.287929	0.341406	0	0	0	0	0	0	0.164225	0.202007	0.171693	0	0	0.0585784
12-ketoLCA	0	0.156056	0.634542	0.156126	0.694691	0	0	0	0	0	0	0.27417	0	0.67059	0	0	0	0	0	0.586965	0.0908573	0.0593122	0	0	0.239739	0.19931	0.503972	0	0	0.0956787	0.465751	0.458428	0.120261	0	2.05118	0.227279	0.26301	0.410606	0	0.274889	0.190195	0.0787424	0.157219	0.0667405	0	0	0	0	0
DCA	5.02668	2.57426	3.05331	37.1595	9.41932	1.21945	4.69772	2.0258	1.30982	1.31094	3.75484	5.86037	2.6107	5.41137	1.97864	0.468877	0.662727	0.279712	1.59639	1.36655	0.738797	2.0755	0.505583	2.11705	6.84057	3.72445	5.38977	9.92499	1.57786	2.44077	2.38191	6.94323	2.19526	8.41997	2.05652	3.66679	4.81311	2.47607	0.325612	17.4774	0.803268	0.453873	1.12964	1.17155	0.737361	0.988978	0	0.385461	0.226838
23-norDCA	0	0	0	0	0	0	0	0	0	0	0	0	0	0	0	0	0	0	0	0	0	0	0	0	0	0	0	0	0	0	0	0	0	0	0	0	0	0	0	0	0	0	0	0	0	0	0	0	0
7-ketoDCA	6.88249	9.74953	13.9469	23.8616	13.8347	25.0531	2.57819	20.7266	7.56442	0.407825	12.4495	3.89343	34.0837	8.38527	45.885	9.425	2.09881	7.43424	4.21139	3.01142	0.11741	2.71287	1.20686	5.17884	17.9822	3.56659	3.75736	0.316549	33.9896	3.36386	1.70029	14.9878	49.3797	58.1318	46.6619	53.6406	0.451664	1.75373	0.241044	1.47651	0.436265	0.0112242	0.480352	4.971	3.49627	12.5402	0.176229	7.11602	5.59896
3-ketoCA	0	0	0	0	0	0	0	0	0	0	0	0	0	0	0	0	0	0	0	0	0	0	0	0	0	0	0	0	0	0	0	0	0	0	0	0	0	0	0	0	0	0	0	0	0	0	0	0	0
dehydro-LCA	0	0	0	0	0	0	0	0	0	0	0	0	0	0	0	0	0	0	0	0	0	0	0	0	0	0	0	0	0	0	0	0	0	0	0	0	0	0	0	0	0	0	0	0	0	0	0	0	0
allo-LCA	0	0	0	0	0	0	0	0	0	0	0	0	0	0	0	0	0	0	0	0	0	0	0	0	0	0	0	0	0	0	0	0	0	0	0	0	0	0	0	0	0	0	0	0	0	0	0	0	0
iso-LCA	0	0	0	0	0	0	0	0	0	0	0	0	0	0	0	0	0	0	0	0	0	0	0	0	0	0	0	0	0	0	0	0	0	0	0	0	0	0	0	0	0	0	0	0	0	0	0	0	0
6-ketoLCA	0	0	0	0	0	0	0	0	0	0	0	0	0	0	0	0	0	0	0	0	0	0	0	0	0	0	0	0	0	0	0	0	0	0	0	0	0	0	0	0	0	0	0	0	0	0	0	0	0
β-HDCA	0	0	0	0	0	0	0	0	0	0	0	0	0	0	0	0	0	0	0	0	0	0	0	0	0	0	0	0	0	0	0	0	0	0	0	0	0	0	0	0	0	0	0	0	0	0	0	0	0
β-UDCA	0	0	0	0	0.17774	0	0	0	0	0	0	0.179525	0	0.246951	0	0	0	0	0	0	0	0	0	0.149657	0.20897	0	0.195905	0	0.172537	0.322525	0	0.0711679	0.183172	0.283871	0	0	0	0	0	0.131456	0	0	0.114973	0.15147	0.114904	0.544186	0.312567	0	0.17509
7,12-diketoLCA	0	0	0	0	0	0	0	0	0	0	0	0.572352	0	0	0	0	0	0	0	0	0.612142	0	0	0	0.325156	0	0	0	0.871059	0	0.419123	0	0.835989	0	0	0	0	0	0	0.264044	0	0	0	0.321305	0	0.667271	0	0	0
6,7-diketoLCA	0	0	0	0	0	0	0	0	0	0	0	0	0	0	0	0	0	0	0	0	0	0	0	0	0	0	0	0	0	0	0	0	0	0	0	0	0	0	0	0.412105	0	0	0	0	0	0	0	0	0
12-ketoCDCA	0	0	0	0	0	0	0	0	0	0	0	0	0	0	0	0	0	0	0	0	0	0	0	0	0	0	0	0	0	0	0	0	0	0	0	0	0	0	0	0	0	0	0	0	0	0	0	0	0
ω-MCA	3.04539	2.14314	5.57802	2.27384	3.39572	2.09627	3.95885	4.42827	2.13381	0.195341	13.6237	2.59573	3.90728	1.43023	6.40138	0.619181	0.692764	2.158	1.64224	0.584549	1.98675	1.0684	0.789124	4.00466	2.92114	3.02407	0.507911	0	3.42632	1.00636	1.38719	3.95312	4.26033	8.18241	20.3574	4.48115	0.301383	0.659967	1.16905	0.259414	0.33486	0.158616	0.163775	1.68941	1.17541	3.26773	0.36645	3.45094	1.02931
muroCA	0	0	0	0	0	0	0	0	0	0	0	0	0	0	0	0	0	0	0	0	0	0	0	0	0	0	0	0	0	0	0	0	0	0	0	0	0	0	0	0	0	0	0	0	0	0	0	0	0
DHCA	0.358871	0.763686	0.795136	0.450511	0.262205	1.05642	1.08492	0.705173	0.675533	0.327423	2.40033	0.295962	0	0.167649	0	0	0	0.316283	0.969267	0.227411	0.447914	0.133403	0.171863	0.180509	0.523999	0.363353	0.463658	0.428483	0.478703	0.207396	0.750249	0.448553	0.605324	0.255051	0	0	0.25309	0.65711	0	0.320319	0.152932	0	0	0.210787	0	0.49356	0.282691	0	0
UCA	17.5197	13.2123	19.5478	81.6063	37.7473	44.5944	19.9876	51.0136	2.56611	3.21138	46.6586	59.3418	262.961	12.6373	148.666	35.5233	5.88706	25.6129	3.82761	8.79121	3.37942	17.9775	2.68245	12.2983	22.771	5.96869	3.5103	17.3127	491.481	35.3516	2.47624	50.4146	55.9383	47.7761	1.21438	73.917	3.63306	4.7838	26.1956	3.55362	3.5205	0.525581	2.97376	91.2123	18.75	287.705	21.194	201.842	22.5689
ACA	0	0	0	0	0	0	0	0	0	0	0	0	0	0	0	0	0	0	0	0	0	0	0	0	0	0	0	0	0	0	0	0	0	0	0	0	0	0	0	0	0	0	0	0	0	0	0	0	0
GCA	0.982526	5.07661	1.97359	5.07425	1.90715	2.58514	9.79331	1.30002	9.32112	3.7955	1.37833	1.57444	8.61434	1.88582	2.53166	6.64989	2.85584	7.82507	9.09752	1.26307	4.21433	0.83738	1.21812	1.90589	3.64325	2.70175	2.6362	1.34256	6.31999	3.24688	5.77568	2.97411	5.66424	2.2762	0	1.72992	1.59955	4.46486	2.5645	4.60709	2.78761	3.0007	1.63954	3.37643	1.89058	4.30266	4.32845	1.27637	1.23062
TCA	0	1.3015	0	1.05135	0.334013	0.654406	2.31508	0.429252	1.20239	1.06577	0	0	0	1.14637	0.700897	0.565076	0.655883	1.21043	3.15293	0.470184	2.45311	0.317802	0	0	0.477469	0	0	0	0.945065	0.574278	0.549656	0.350329	0.192623	0	0	0.753082	0	0.718868	0.368538	0.49804	0.828015	1.01299	0.426946	0.768073	0.277365	0.70751	1.03766	0.450036	0.308414
GCDCA	0.41596	2.38782	0	1.9408	1.72351	0.479635	2.00759	0.530454	1.30703	1.00879	0	1.42594	2.4622	1.21943	0.352626	1.63215	0.286178	3.63637	0.325766	0.747074	0.709763	0.401586	1.74881	1.12493	1.78936	1.18142	0.97293	0.295469	2.77896	0.574297	2.0236	1.25609	1.19084	1.37342	1.27674	0.485157	0.312001	1.23773	0.774093	1.25034	1.05217	0.902762	0.630721	1.38694	0.712125	1.90967	2.4872	0.494074	0.670448
TCDCA	0	0.602685	0.3205	0.334354	0.314052	0.323321	0.52773	0.216342	0.522149	0.305744	0	0.243997	1.20107	0.623429	0.246384	0.5523	0.222897	0.506792	0.381859	0.298193	0.330495	0.179349	0.206607	0.201247	0.249697	0.227529	0.193651	0.431438	0.220012	0.133118	0.201294	0.221751	0.0941922	0.221399	1.43787	0.821681	0	0.284975	0.178265	0.197479	0.293921	0.205581	0.136917	0.217009	0.178381	0.139124	0.594281	0.182304	0.155016
T-α-MCA	3.47984	4.28402	7.28969	4.168	1.45578	1.80204	17.5027	2.80033	26.0258	6.29948	16.7344	1.74354	16.2383	2.72348	3.19596	2.76107	3.27157	0.967762	17.9806	1.70747	38.7404	1.54252	4.75522	3.85961	2.55148	1.5005	1.19503	0	2.00265	0.798528	2.90219	1.49414	1.42803	0	10.5069	1.92856	2.16561	3.47315	3.96865	0.859227	3.85071	14.3535	2.46533	0	1.53373	0	2.31669	0	1.33015
T-β-MCA	0	0	0	0	0	0	0	0	0	0	0	0	0	0	0	0	0	0	0	0	0	0	0	0	0	0	0	0	0	0	0	0	0	0	0	0	0	0	0	0	0	0	0	0	0	0	0	0	0
GHCA	1.01268	3.48136	1.5601	2.20429	1.44077	0	8.5037	0.971207	10.4399	4.67034	0	2.08855	0	0.645404	2.15311	2.46735	0	6.92718	1.18326	1.22714	1.45184	0.26206	0	1.76109	1.57589	1.09732	0.856873	1.92418	1.34213	0.737458	1.94432	2.0214	2.07444	1.47439	6.68247	0.930671	1.38401	2.73316	13.1079	1.23501	1.7687	5.24821	2.52254	0.921418	0.848643	3.05552	9.95117	1.20094	1.59095
THCA	0	0	0	0	0	0	0	0	0	0	0	0	0	0	0	0	0	0	0	0	0	0	0	0	0	0	0	0	0	0	0	0	0	0	0	0	0	0	0	0	0	0.469062	0	0	0	0	0	0	0
GHDCA	0	0	0	0	0	0.470473	0	0	0	0	0	0	0	0.190661	0	0	0	0	0	0	0	0	0	0.350754	0	0	0	0	0	0	0.417886	0	0.359808	0	0	0	0.17911	0	0	0.1849	0	0.104143	0.0820265	0	0	0	0.395217	0	0
THDCA	0	0	0	0	0	0	0	0	0	0	0	0	0	0	0	0	0	0	0	0	0	0	0	0.157937	0.0575725	0	0	0	0	0	0	0	0	0	0	0	0	0	0	0	0	0.0800766	0	0	0	0	0	0	0
GUDCA	1.18796	1.45568	0.941165	0.612222	1.06401	0.830521	1.33766	1.51804	0.988926	0.196461	5.04399	2.06472	2.32118	0.703072	0.906298	0.439472	0.396132	3.39547	1.6086	0.487131	0.219594	0.130871	3.15692	0.838558	2.50735	0.441737	1.93702	0.795553	1.31718	0.247132	1.57098	2.03032	3.78084	1.24803	2.24371	0.567341	0.916064	0.677304	3.59748	1.13371	0.450634	0.389747	1.1572	0.700664	0.439034	1.36963	10.097	0.982288	1.02874
TUDCA	0	0	0	0	0	0	0	0	0.409676	0.258118	0.485073	0.1572	0	0	0	0	0.17736	0.127062	0	0	0.149053	0.105534	0	0	0.0497264	0	0.115677	0	0.169273	0	0	0	0	0	1.24899	1.28071	0	0	0.166634	0	0	0.0427078	0	0	0.0556143	0.086999	0.482233	0	0
GLCA	0	0	0	0	0	0	0	0	0	0	0	0	0	0.1119	0	0	0	0	0	0	0	0	0	0	0	0	0	0	0	0	0	0	0	0	0	0	0	0	0	0	0	0	0	0	0	0	0	0	0
TLCA	0	0	0	0	0	0	0	0	0	0	0	0	0	0	0	0	0	0	0	0	0	0	0	0	0	0	0	0	0	0	0	0	0	0	0	0	0	0	0	0	0	0	0	0	0	0	0	0	0
GDCA	1.50554	1.21861	0	1.1624	1.69074	0	6.45321	0	1.86339	1.07695	2.76841	1.31351	5.8051	0.647795	0.847748	1.00542	1.15732	0	5.43847	0	1.14373	0.412671	0	0.947575	2.42539	1.75365	1.77631	0	0.715935	0.578618	5.03817	1.13503	2.59289	1.27482	0	0	1.11397	1.57345	0.532633	0.638295	0.956669	1.13037	0.879739	0	0.326467	0.246617	0.828203	0.658848	0
TDCA	0	0	0	0	0	0	0	0	0	0	0	0	0	0	0	0	0	0	0	0	0	0	0	0	0	0	0	0	0	0	0	0	0	0	0	0	0	0	0	0	0	0	0	0	0	0	0	0	0
T-ω-MCA	0	0	0	0	0	0	0	0	0	0	0	0	0	0	0	0	0	0	0	0	0	0	0	0	0	0	0	0	0	0	0	0	0	0	0	0	0	0	0	0	0	0	0	0	0	0	0	0	0
GDHCA	0	0	0	0	0	0	0	0	0	0	0	0	0	0	0	0	0	0	0	0	0	0	0	0	0	0	0	0	0	0	0	0	0	0	0	0	0	0	0	0	0	0	0	0	0	0	0	0	0
TDHCA	0	0	0	0	0	0	0	0	0	0	0	0	0	0	0	0	0	0	0	0	0	0	0	0	0	0	0	0	0	0	0	0	0	0	0	0	0	0	0	0	0	0	0	0	0	0	0	0	0
CA-3S	0.0387424	0.0585877	0.0464963	0.2353	0.0678481	0.0267598	0.195281	0.102689	0.0898455	0	0	0	0	0.109355	0.27821	0	0	0	0	0	0	0.0458146	0	0	0.0713227	0	0	0	0.426232	0	0.070793	0.151355	0.0714446	0.159618	0	0.196444	0	0	0	0	0	0	0	0	0.0552467	0	0	0	0
CDCA-3S	4.14435	2.45454	2.52619	10.9356	9.83671	2.65607	7.29059	7.31095	1.48948	0.462582	7.29013	6.02436	0.942011	4.47559	17.5552	0.645982	0.336841	3.10731	0.360225	0.913101	1.19452	1.13869	0.341318	2.97056	6.00539	2.22119	1.26916	0.694849	40.3414	2.24799	1.78021	11.3787	7.6123	14.6744	0	7.83884	0.495721	0.768568	0.424191	0.672823	0.559121	0.276959	0.145263	1.65772	3.79827	0.470238	0.82834	2.96723	0.395844
UDCA-3S	3.10729	1.28454	1.21253	7.37554	5.08361	2.0396	2.88402	5.94229	1.04614	0.407114	6.07969	5.2239	2.7597	3.63004	12.1277	0.428346	0.489816	1.5757	1.55865	0.988827	0.896287	1.23899	2.61584	0.892231	6.84054	0.918195	1.35322	1.20436	24.1972	2.55742	1.47292	7.14782	9.00142	10.1276	2.71236	8.68277	0.814796	1.09531	0.346131	1.06331	0.36498	0.660842	0.356734	2.33897	4.95299	3.76984	4.21253	5.87656	0.599423
LCA-3S	5.1248	2.27443	2.16793	2.00219	6.56451	6.64366	2.34318	3.04945	1.89662	0.197901	30.0349	1.25998	0	2.8387	1.59228	0	0.250433	0	1.89412	0.115252	0.150327	0.175659	0.79008	0.811286	6.29514	4.25654	1.18891	1.17211	0	0.561792	5.01611	3.94768	23.2736	6.32699	2.70326	5.05859	2.32016	1.31098	0	0.54407	0.207005	0.470994	0.362627	0	0.277279	0	0	0	0
DCA-3S	7.74315	3.58496	3.91771	4.4049	5.25553	4.04814	10.7107	3.833	1.21853	0.211299	17.8417	3.79687	11.515	2.82647	10.969	0.190848	0.88595	0.170738	2.79255	1.2612	2.00499	1.21825	1.44334	2.54469	6.24425	5.51769	1.12033	0.654691	1.42013	1.63256	3.54751	5.36229	9.03879	9.827	0	7.10523	1.20893	1.38604	0.109094	0.519088	0.309376	0.286485	0.267407	0.110943	0.988967	0	1.64282	0	0.114978
GCA-3S	1.08032	2.60774	0.576724	3.86119	0.826546	1.47174	12.3784	1.04707	2.90721	2.14948	1.05611	1.25365	4.85128	1.14249	3.43033	1.46961	1.82728	4.03258	2.43137	0.901507	9.33785	0.520248	2.03423	1.2461	3.09995	2.68107	1.049	0.784182	7.16736	2.86526	2.20081	3.24538	4.86138	2.05165	0	2.16338	1.34635	3.03759	2.04414	2.61987	2.36319	3.25397	1.09755	2.11744	2.85128	3.61023	3.80711	1.2904	0.619781
TCA-3S	0	0.292997	0	0.524985	0	0	1.20478	0	0	0.328046	0	0.136465	0	0.22483	0.646851	0	0.250433	0.4152	0.422817	0.122179	1.7339	0.0815156	0.207598	0	0.15889	0.130198	0	0	0.322185	0.192735	0.109153	0.142803	0.128724	0	0	0	0	0.275395	0.266604	0.147386	0.346489	0.424756	0.119693	0.296552	0.267578	0.249358	0.359204	0.0931353	0.113046
GCDCA-3S	62.0263	107.562	35.6518	191.753	87.1333	37.1894	280.466	48.972	140.574	90.6279	74.6303	102.964	143.121	51.5516	73.4783	49.8423	33.4671	179.694	67.2424	41.2946	166.91	26.6298	76.9734	84.7385	103.497	80.4807	68.1346	67.9246	329.128	85.2592	100.721	108.664	123.228	62.0684	114.12	52.7385	90.7406	92.6918	175.673	113.217	73.7464	191.638	63.4791	64.6962	100.614	186.33	246.609	53.8738	34.9806
TCDCA-3S	1.80958	4.62563	1.53097	7.44212	1.83603	1.64944	12.8227	2.87386	6.27855	6.01188	4.18994	2.13479	4.27026	5.97341	5.2504	1.02371	1.51339	6.51841	4.80159	2.08664	12.5662	0.990484	3.89322	1.90228	1.94934	1.75851	1.41179	2.38621	5.22591	2.28228	1.59927	3.11355	1.671	1.26737	7.03045	2.22077	2.44358	3.21536	8.07524	2.24236	3.94266	9.46879	2.46754	2.0092	5.40772	3.67459	9.10341	1.55867	1.84609
GUDCA-3S	12.4685	14.3574	3.9321	52.6941	19.7231	7.82786	35.3157	14.3871	5.7032	4.88487	15.5154	29.3636	47.7057	12.732	31.0931	3.22701	7.55816	18.8441	7.11909	9.49614	28.8144	6.6339	3.86123	9.13069	45.0199	7.79286	15.2493	10.0181	65.833	29.9811	18.1168	29.3844	47.1297	35.0002	10.1006	16.9509	7.9183	6.40351	11.6476	21.2005	5.06069	8.57609	5.26993	23.2528	32.3397	128.433	143.654	40.6602	9.09195
TUDCA-3S	0.484111	0.562124	0	1.90029	0.327503	0.326814	1.79682	0.589084	0.390434	0.722337	0.878568	0.410961	1.8975	1.08326	2.01809	0	0.457195	0.84006	0.665638	0.422634	2.09717	0.213671	0.176677	0.371405	0.859791	0.178354	0.295838	0.404222	1.36283	0.834308	0.255323	0.608899	0.568488	0.442506	0	0.471535	0.277078	0.264938	0.582059	0.396818	0.390438	0.361537	0.271119	0.898252	1.3012	2.97811	6.00749	1.53531	0.517519
GLCA-3S	155.632	138.249	62.7091	63.2735	262.963	97.0587	336.419	47.5224	199.048	53.6725	289.781	52.8733	4.17204	104.274	26.9296	12.9674	36.6533	8.97667	221.94	10.0436	33.1462	14.578	116.529	43.2693	326.638	117.014	148.186	62.4437	1.3599	38.9732	424.881	95.2716	302.854	85.7311	347.162	79.6047	266.159	241.682	20.5898	121.921	69.3964	158.307	87.6017	3.24048	41.2298	8.67086	1.12843	0.542556	5.41047
TLCA-3S	16.9512	29.9109	8.53309	12.2485	22.5132	15.6279	92.5485	8.11611	35.9254	24.403	53.9268	4.64192	3.35927	29.1736	11.4654	1.45871	8.40151	2.04139	52.6066	2.91474	12.7022	3.91871	20.0242	5.475	30.5146	12.5045	7.60354	8.88106	0.464743	5.47194	36.305	9.6225	11.0611	7.25116	65.2592	10.2948	48.8835	37.132	7.39785	15.1919	18.5357	51.16	16.418	0.614842	5.25091	1.37961	0.730101	0.360164	2.60541
GDCA-3S	292.54	402.442	140.629	182.203	151.617	167.259	1594.93	59.1421	245.909	171.49	394.029	162.406	0.968688	71.3525	119.321	32.686	153.07	26.3105	537.84	75.467	498.142	50.4358	375.914	163.79	345.839	391.773	170.885	124.293	111.141	139.036	484.762	111.423	364.304	127.653	273.416	132.385	280.562	311.293	80.0145	184.265	99.0549	288.32	185.729	13.9346	90.1765	42.3767	128.569	0	27.2617
TDCA-3S	7.16746	15.3669	4.12874	6.51194	2.48257	4.80803	53.1989	2.8274	9.05865	11.4249	16.2169	3.43773	0.58816	5.97303	8.59125	0.823277	6.15143	0.864876	33.0313	2.99215	37.1632	2.52751	13.2086	3.08626	6.08899	6.8378	2.49739	3.28171	0	3.35294	6.3438	2.78359	3.26793	2.02924	13.0399	3.49664	7.6341	9.26607	3.18552	3.15228	4.29546	13.1103	5.96891	0.569468	3.87694	1.04299	0	0	1.45698
Fig 1e
	humans
CA	272.166	3788.84	0	2149.79	0	813.632	0	0	0	0	9.35326	6.50572	391.751	8.03261	179.152	6.47654	13.9801	66.1665	226.628	16.7463	2360.83	1347.52	14280.1	38808.3	0	0	43.2344	0	0	12729.7	16.0326	15466	262.342	0	0	0	42.94	717.999	69.2831	0	0	219.429	36.9479	201.941	45.4054	25.3282	139.528	8.44501	36.8948
CDCA	1418.5	2553.11	54.2584	1014.4	242.893	1212.26	22.8296	7.461	2.07712	41.8289	43.8796	37.4637	482.531	34.1275	590.243	32.9583	397.309	1265.8	935.585	48.5501	2352.13	2600.42	3635.86	9112.97	242.893	4.71136	89.8952	6.43936	11.0753	4211.69	78.9458	14482.6	201.227	3688.31	6973.24	1559.04	48.0982	1878.51	117.882	1322.67	8415.46	471.687	88.9006	284.559	685.335	71.4596	155.405	30.9806	82.2881
α-MCA	0.937006	0	2.40629	0	2.96113	0	3.78338	1.50934	9.85197	5.63746	7.30887	5.16949	10.4275	5.9789	0	8.86837	0	7.39722	12.3635	3.74972	11.3295	17.4886	0	0	0	0.747955	2.34911	1.88092	10.3298	0	3.11087	0	3.06719	0	0	2.47635	12.842	12.9351	6.5895	8.78144	0	8.27676	5.80934	0	11.9775	11.6233	4.3752	4.9658	5.05343
β-MCA	0	0	0.0377	0	0	0	0.329909	0	0	0	5.43746	6.82845	11.226	2.95213	10.2792	11.8162	2.4619	8.90188	7.5891	6.14668	26.0342	27.7946	127.324	364.587	0	0	0	0	1.1167	0	0	0	0	0	0	0	0	19.3806	3.45146	9.90937	317.545	6.81323	9.4577	9.73495	8.80542	4.89485	4.17242	8.05523	6.4898
HCA	2.69265	18.7634	0	63.0043	10.7091	16.7974	0	0	0	0	2.34348	11.6865	20.1037	7.00072	10.3485	3.96473	5.90874	17.3785	30.6158	6.0045	64.7284	33.6063	110.992	134.911	0	0	5.73671	0	6.49465	27.5105	6.66077	131.186	8.65223	56.3467	65.619	27.4187	9.55149	39.4932	6.77442	27.9424	89.3232	23.9796	3.60472	14.9878	8.28207	5.93056	8.53651	2.64899	6.18545
HDCA	10.1701	10.023	38.6555	0	6.39007	28.6292	34.4749	18.0098	21.2559	28.7855	57.1324	22.7358	54.1333	40.0225	68.5511	66.3618	33.8968	63.8595	13.8173	56.3769	51.5482	158.843	11.3706	0	0	27.0973	45.0618	27.7741	55.9811	40.1664	8.81407	0	0	0	0	56.248	60.3398	85.3251	28.6943	0	29.0187	0	49.1736	65.117	68.4821	28.3598	93.5425	73.3603	54.6578
UDCA	132.981	355.529	119.903	1064.43	0	479.965	0	0	0	0	19.0039	25.1581	408.241	50.7724	454.429	44.9271	89.8244	538.469	198.656	14.4823	210.362	1094.27	1514.84	2989.55	0	0	95.1901	0	0	2840.55	157.738	5747.56	613.112	4047.07	752.95	611.383	49.24	394.127	51.3318	1380.87	3467.28	1019.27	362.394	369.259	372.459	49.3589	94.8489	35.0352	42.6802
LCA	3107.7	2236.16	4186.28	897.182	1926.52	4654	2305.1	1419.17	2351.03	4599.36	7476.66	5482.32	2670.92	2849.48	7913.34	4406.98	1106.77	4540.1	10149.2	2060.09	1773.02	5573.84	1956.55	42.4174	3345.53	3328.54	2857.53	2371.75	6124.79	790.34	3345.53	87.2256	110.274	140.726	425.655	4002.54	5418.69	7409.71	3545.62	5521.94	41.3048	5429.77	6428.7	6556.25	3763.43	7190.76	6333.91	5478.58	3668.27
7-ketoLCA	19.1203	91.5652	8.9146	252.56	0	106.018	0	0	0	12.69	8.57233	11.3805	115.525	16.8651	198.966	9.87194	38.04	134.884	152.058	8.33058	109.261	250.153	270.884	36.8347	0	0	5.36608	0	0	428.293	10.2288	667.889	116.666	234.178	687.551	89.8363	18.2904	204.486	29.9571	331.301	687.304	359.12	18.3614	89.1296	91.6544	21.8729	21.7919	12.2428	15.1354
12-ketoLCA	651.5	199.634	1283.3	405.295	811.052	816.169	842.709	189.748	183.301	1204.75	2042.98	1373.58	698.524	791.125	1832.17	915.041	368.618	498.992	2432.59	290.572	378.175	1474.25	956.611	20.2613	813.611	722.72	251.649	286.485	2084.23	142.77	100.393	38.8196	0	0	169.435	262.848	1584.87	880.879	994.68	1878.3	0	2122.77	5188.92	708.742	1225.87	1541.51	1009.73	1549.59	993.902
DCA	4258.19	7461.1	8547.04	2899.22	1618.59	7949.18	3298.45	2441.67	2276.27	2382.79	7371.1	6229.63	5134.96	2712.56	7692.61	7279.21	2098.33	5048.01	9586.23	3329.19	4705.56	10472.1	7842.83	302.677	5043.18	4038.04	3660.03	1514.02	10578.3	2647.21	3631.13	1480.23	5194.49	20.5355	3243.38	6125.33	3492.11	17257.8	5090.51	7862.26	71.2746	9178.58	7709.43	8335.47	5043.18	7512.17	7326.53	5175.3	6190.46
23-norDCA	0	0	0	0	0	0	0	0	1.78682	0	4.32749	3.93039	5.94839	0	5.83047	5.44521	1.6794	6.19371	4.34109	1.64996	8.22039	13.891	7.22988	27.3796	0	0	0	0	0	0	0	0	0	0	0	0	2.83684	7.40354	1.3141	2.78566	7.5451	2.81001	0	4.38366	2.90567	3.3451	3.86869	5.83046	4.45854
7-ketoDCA	1.80311	252.63	6.75693	847.067	2.3024	99.7313	2.09728	5.54315	15.231	14.074	3.13791	5.60503	81.4529	8.5683	46.4114	5.07941	2.65542	22.6057	35.318	3.93851	69.4161	104.631	472.916	5157.5	15.231	0.814091	10.5653	3.97952	6.17661	1649.91	2.74243	2449.67	194.163	600.735	996.687	94.5663	10.4028	99.3798	15.3465	87.7554	1545.03	85.2461	5.55264	31.0627	21.7918	7.2244	12.8737	2.87183	8.14842
3-ketoCA	8.93644	38.3086	5.16322	155.267	3.70565	24.4008	0	0	2.94848	8.07935	2.60149	4.28294	38.9826	1.66908	37.5252	3.28906	10.1734	11.8323	25.9462	1.44612	147.167	147.524	813.58	1827.44	0	0	0	0	5.85367	270.928	0	402.104	13.1321	139.684	214.75	29.2803	4.07972	74.9883	7.73606	88.44	2540.29	23.8411	0	14.6978	12.5598	3.47424	7.50761	3.40338	6.70672
dehydroLCA	102.704	16.0976	188.09	41.0287	436.345	127.112	81.3828	58.5629	84.3617	915.935	721.87	890.898	185.534	414.07	664.878	271.149	79.3466	409.827	822.103	109.806	42.5152	186.814	115.49	6.93879	0	0	41.8284	163.687	998.016	19.9187	52.7614	8.83437	110.518	55.8739	14.7113	56.9956	2762.58	118.203	236.868	504.891	6.25145	429.837	2691.83	259.707	438.896	1706.83	303.678	899.581	366.531
allo-LCA	4.52429	1.42064	33.7129	1.08338	180.525	0.732895	3.86284	21.4975	152.688	120.71	0	0	0	0	0	0	0	0	0	0	0	0	0	0	0	9.76818	5.52658	68.2277	174.752	0.747541	1.0855	4.19357	0.687723	0.268664	0.338702	3.22482	0	0	0	0	0	0	0	0	0	0	0	0	0
iso-LCA	274.312	84.6912	1568.69	132.661	564.377	422.159	226.506	310.837	628.444	913.167	745.015	689.114	144.824	291.064	928.404	783.295	93.0317	491.336	188.905	238.85	123.821	536.148	85.8745	4.20059	394.292	714.624	394.292	591.924	2506.82	70.5223	517.183	14.7097	2.84955	13.0562	43.0925	558.806	708.59	610.282	341.159	355.734	5.31788	381.499	1049.39	530.962	415.852	1495.5	547.107	659.236	357.609
6-ketoLCA	0	0	0	9.44413	2.3488	6.11921	0	0	0	6.17699	13.1988	30.0503	18.2672	7.012	24.1219	9.34	9.44413	26.2837	65.464	8.27406	9.40423	27.3274	42.3293	39.3892	0	0	3.43848	1.58715	6.27416	0	9.56503	0	0	0	0	3.98618	13.7278	9.44009	8.42723	43.1685	56.7907	59.4877	21.9554	16.7228	18.262	27.4735	13.4305	11.5395	12.2778
β-HDCA	0	0	4.30425	0	0	0	1.19456	0.797925	2.09606	0	46.6972	35.5673	0	20.4395	44.6549	47.9599	15.8999	32.6239	16.2432	21.9578	17.4365	60.7879	17.4134	2.97329	0	1.10659	2.38329	1.95402	4.62428	0	0	0	0	0	0	0	39.7413	32.5064	37.2814	27.7272	2.28462	45.1949	113.419	27.249	35.4549	41.7825	38.071	45.4669	32.8101
β-UDCA	16.2845	25.6424	48.8799	189.185	3.27243	66.8476	1.04955	0.245021	0.677727	19.6291	6.33588	5.59075	55.5475	14.1203	105.769	7.35375	16.2238	164.447	11.4289	5.05154	15.5566	95.2138	223.16	525.195	19.6291	1.55409	23.5089	0.608635	8.7559	470.429	45.2716	977.158	133.066	569.248	152.689	127.466	8.63018	30.677	17.0912	217.138	366.679	302.135	9.20031	63.9602	15.3906	18.5797	11.5626	5.55238	5.27374
7,12-diketoLCA	1.78053	1.78053	1.78053	24.9075	0	5.19605	0	0	0	9.60354	0	2.21235	1.69511	1.25783	1.81183	1.03435	1.44638	2.23352	1.19943	1.55935	1.48868	1.37292	1.3587	1.83861	0	0	0	0	0	23.9108	0	12.4182	4.95804	12.0872	18.001	0	0	1.38957	0	2.27431	1.02907	1.40817	2.39222	0	1.29143	1.66648	2.13622	1.18113	1.99153
6,7-diketoLCA	0	0	0	0	0	0	0	0	0	0	0	0	0	0	0	0	0	0	0	0	0	0	0	0	0	0	0	0	0	0	0	0	0	0	0	0	0	0	0	0	0	0	0	0	0	0	0	0	0
12-ketoCDCA	0	0	9.73309	102.244	22.9144	0	14.9619	0	0	18.0419	0	0	0	0	0	0	0	2.15545	0	0	1.94071	0	26.0943	75.2507	0	0	10.8296	14.2908	108.61	0	2.09424	50.2099	8.51272	41.2854	0	0	0	1.63145	0	1.06282	66.5534	3.61081	6.19071	3.86871	0	2.64703	0	0	0
ω-MCA	2.53927	111.705	12.1854	140.821	3.4714	65.9958	4.23082	31.0846	6.99076	1.55516	13.5998	0	17.63	0	9.79838	0.491745	0.273657	47.2217	0.939547	0	65.6261	76.1722	1230.37	3483.51	0	0	29.2413	1.03072	15.0143	812.98	22.2631	1101.45	20.9442	370.65	372.439	68.4241	1.45946	11.1304	2.66324	20.4944	2269.38	52.957	0	5.68399	2.42264	4.95267	2.46925	0	1.31266
isoDCA	3.20904	0	0	0	0	0	0	0	0	0	2.53315	1.36437	0	0.996074	0	0	0	0	0	1.25687	0	0	0	0	0	0	0	0	0	0	2.43476	0	2.47388	0	0	0	0.973797	0	0	0	0	0	0	0	0	0	0	1.27367	0
apoCA	0	0	0	0	0	0	0	0	0	0	0	0	0	0	0	0	0	0	0	0	0	0	0	0	0	0	0	0	0	0	0	0	0	0	0	0	0	0	0	0	0	0	0	0	0	0	0	0	0
muroCA	0	0	1.42348	0	0	1.22079	0.991843	0.709129	0.532879	0.693805	0	87.3516	34.5998	0	71.289	46.0664	35.326	43.7868	103.129	30.2291	23.6858	224.931	49.376	0	0	0	2.01089	1.34398	2.96236	0	1.82495	0	0	0	0	0	35.8823	78.6921	20.6866	41.0931	0	66.1958	0	41.7589	51.771	74.4974	54.4266	65.4738	38.797
DHCA	0	0	0	0	0	0	0	0	0	1.49086	0	5.36088	1.4565	1.27712	1.49815	1.3608	2.66916	6.03351	5.44854	1.15266	3.51052	1.77082	1.42323	6.1966	0	0	0	0	0	0	0	0	0	0	0	0	2.11058	4.4791	1.5016	4.31111	2.55035	2.67382	0	1.14536	0	4.62854	1.0256	0	3.93833
UCA	0	427.553	10.3494	1039.59	0	188.942	0	0	0	0	7.14294	5.19784	56.968	5.83468	81.2748	7.52217	8.97117	74.1092	30.3939	3.12511	61.0402	165.222	585.303	14808.4	0	0	15.3005	0	0	5635.73	28.5823	6569.35	1299.29	6249.09	798.854	392.196	8.83439	100.434	6.41805	194.66	5654.84	364.162	9.3431	48.6799	16.1155	15.4569	11.7868	4.17976	13.791
ACA	0	0	31.5113	0	0	51.2595	0	0	0	0	0	0	18.191	1.91102	6.37167	1.27196	0	15.5153	22.4389	0	0	29.3738	229.305	258.241	0	0	4.12253	0	0	0	14.8695	0	0	0	0	47.3185	0	26.8477	3.26851	24.5804	159.969	30.4869	2.83374	11.223	0	2.32924	3.29727	0	2.15381
GCA	28.0195	18.7742	4.0268	14.112	17.8796	63.4134	4.92024	15.6218	7.8297	8.83038	8.71634	4.52106	74.7517	3.76815	18.689	2.59497	69.9486	1.4195	8.08576	13.9466	53.1868	20.3792	357.235	101.68	14.112	25.1764	3.3476	4.57048	8.58196	103.21	11.9874	46.1719	11.8844	13.686	16.644	262.393	8.44657	403.77	30.2287	36.0386	52.3622	91.8177	13.686	40.9208	5.68436	7.24496	202.38	1.52859	8.11213
TCA	14.2588	7.16495	2.33641	26.0404	4.51113	50.2145	1.24411	20.1884	1.4647	0.0504	2.41277	3.5243	10.6438	1.4395	4.69322	2.61719	4.60217	1.82359	1.70974	7.46879	254.182	4.30336	146.207	93.8744	4.60217	6.88523	4.60217	1.82209	4.60217	375.005	2.83326	148.095	7.87612	165.974	40.4459	158.677	2.74342	24.4433	5.48625	3.90034	27.781	16.797	0.428647	2.35429	3.22662	4.45933	62.7025	0.513477	1.33493
GCDCA	266.921	20.3475	9.65231	19.6244	19.3291	123.227	12.2227	15.0371	12.737	10.6941	23.8802	4.27147	122.8	3.00499	67.3335	1.61668	108.859	3.77479	22.7131	24.2407	30.5972	32.2618	296.645	92.394	22.7131	25.8605	8.22532	6.96787	16.204	45.8925	19.2115	23.2213	22.6346	14.1346	16.0082	714.364	21.2498	245.744	39.9739	40.6712	98.7994	74.9757	0.546589	64.4346	155.609	15.5878	204.027	3.71268	35.8497
TCDCA	76.7308	7.14366	2.22126	8.15444	6.49623	139.954	4.88218	8.9666	4.07258	3.88555	2.29629	1.60459	9.36279	1.19799	4.81643	0.52015	20.5855	2.34597	2.42252	6.37171	60.5186	9.35782	41.3834	25.9155	7.96638	8.8075	6.80481	2.81526	3.98641	52.0279	8.029	11.8639	6.56696	14.8246	41.8387	375.964	0.5111	14.6919	6.38158	9.19001	17.8082	9.37094	0.0746	7.96638	12.6338	4.63112	53.986	0.907943	8.54861
T-α-MCA	0	0	0	0	0	0	0	0	0	0	0	0	0	0	0	0	0	0	0	0	18.1823	0	5.05481	3.30559	0	0	0	0	0	0	0	0	0	0	0	0	0	0	2.60271	0	4.28992	0	0	0	0	0	0	0	0
T-β-MCA	0	0	0.701294	0	0.705479	0	0	0.71556	0	0	1.332	1.38457	1.38491	0.830117	0.979776	1.33695	0.530001	0.859904	0.78259	1.09135	0	0.984069	0	2.17108	0	0	0	0	0	0	0	0	0	0	0	0	2.21698	2.67478	0	0	2.81758	0	0	0	0	0	0	0	0
GHCA	0.777684	0.925161	0	0	1.17517	0	0	1.02946	0	0	0	0	0	0.476165	0	0	0	0	0	0	0	0	0.78422	0	0	0.514091	0	0.285743	0	0	0.989339	0	0.458929	0.684025	0	0.908197	0	0	0	0	0	0	0	0	0	0	0	0	0
GHDCA	0.780791	0	0	1.48596	0	0	0	0.767012	2.24288	0	0	0	0	0	0	0	0.00422	0	0.045	0	0	0	0.0166	0.101653	0	0.447273	0	0	0	0	3.59168	0	0	0	0.677885	4.0363	0	0	0	0	0	0	0	0	0	0	0	0	0
THCA	0	0	0	0	0	0	0	0	0	0	0.208653	0.60082	0.445171	0.909045	0.32195	0	0.546491	0.128699	0.382648	0.379662	4.59868	0.335131	0.802835	0.595232	0	0.606364	0	0	0	0	0	1.77812	0.541993	0.668971	1.01202	1.61756	0.0946	0.538614	0.461074	0.346497	0.643147	0.815488	0.432235	0.360277	0.740564	1.15446	1.33807	0.250319	0.205267
THDCA	0	1.80538	0.443261	3.0447	1.08219	1.71	0	0	0	1.89174	0	0	0	0.310076	0.317689	0	0	0	0	0.249799	0.468441	0	0	0	0	1.43545	0	0	0	0	1.71642	0	0	2.50829	0	3.19251	0	0.242673	0	0	0.698915	0.817594	0.454176	0	0.668193	0	0	0	0
GUDCA	2.61921	1.45656	0	2.19198	1.77671	8.63289	0.730211	1.13112	0.571818	0.363717	1.56261	0.499201	34.6129	0.800055	7.34339	0	11.9345	1.4537	1.28757	0.229652	1.0557	13.1407	86.2964	16.6879	1.98434	2.41409	0	0.451606	1.33452	4.94787	0.741791	7.24631	3.24933	1.57558	0.995192	19.3419	6.27778	30.0958	5.60483	11.6082	56.5679	28.2154	1.98434	16.8187	151.161	4.75462	29.1402	0.709751	1.03106
TUDCA	1.13416	6.18237	0.802773	9.01146	1.75531	7.12079	0.394864	1.13416	1.98561	1.13416	0.760398	0.731579	1.09889	0.463355	0.543838	0.679608	1.81005	0.791219	0.272599	0.600496	1.16942	1.54027	3.51553	1.33766	1.13416	0.149318	0.670127	1.32189	0.283519	10.1289	3.00043	3.7054	0.797098	14.6089	6.69567	13.9393	0.268413	0.659215	0.186294	3.01424	12.3736	2.89115	0.444633	0.594381	5.07363	2.01368	6.81967	0.61235	0.252144
GLCA	1.37994	0.189892	0.281701	0.295702	0.317123	0.858684	0.737764	0.30166	0.170152	0.460767	0.760211	0.389325	0.413246	0.287402	1.21785	0.153531	0.457699	0.176541	1.28392	0.334167	0.698136	0.241337	0.131994	0.396185	0.396185	0.877955	0.353924	1.79498	1.44076	0.392787	0.863966	0.244318	0.194643	0.130108	0.23125	1.59016	0.111776	0.478751	0.401127	0.467218	0.396185	0.811426	0.235505	0.278211	4.7568	0.196274	1.07115	0.396185	0.87029
TLCA	2.05678	0	0	0	1.09167	2.79368	0	0	0	0	0	0	0	0	1.14623	0	0	0	5.14262	0	9.9128	1.14633	2.93108	1.16719	0	0	1.69367	0	0	1.18623	1.52857	0	0	0	1.04736	1.71148	0	0	0	1.9742	0	1.35032	0	0	2.95372	0	3.05489	1.09167	0
GDCA	123.357	3.40086	7.90148	0.616332	4.6476	82.2937	1.59275	3.43299	4.1753	1.14749	23.5689	2.997	58.8531	0.872855	19.3316	2.79649	76.7346	1.29705	4.43325	13.4527	43.9979	19.1429	73.5035	1.26335	4.43325	6.88273	1.8238	0.763655	4.35657	3.6177	3.98294	1.29631	1.45491	0.323349	3.77524	262.452	6.98285	142.133	17.454	17.6731	0.851259	20.8302	2.33068	11.1164	6.06759	8.592	89.8987	2.18586	27.8668
TDCA	49.0904	0	0	0	3.0911	93.0513	1.14683	0	0	0	2.50682	0	5.3116	1.97326	2.52842	0	12.3335	0	8.20376	3.42724	124.822	5.13227	21.6961	0	0	0	0	0	0	22.1272	0	0	0	0	6.30529	85.3471	2.47177	5.7585	5.36272	5.58307	1.05574	4.65666	0	2.60421	1.4074	0	18.5045	0	4.84394
T-ω-MCA	0	0	0	0	0	0	0	0	0	0	0	0	0	0	0	0	0	0	0	0	0	0	0	0	0	0	0	0	0	0	0	0	0	0	0	0	0	0	0	0	0	0	0	0	0	0	0	0	0
CA-3S	0	0	0	0	0	19.7205	117.861	0	0	0	0	0	8.56045	0	1.88385	0.483636	11.1569	0	0	0	0.644145	2.84078	0.2	0.775385	0	0.972955	0	0	0	27.9708	0	13.4679	33.969	41.1837	0	0	0	0	0	7.58358	0	21.0037	0	0	1.7718	0	8.0896	0	3.74744
CDCA-3S	1.27401	55.6211	42.76	45.8499	42.76	448.27	366.386	13.1811	0	0.961357	143.651	118.904	85.787	0.865455	79.8527	3.91236	103.04	22.0725	69.2051	10.1854	39.6701	123.466	30.8338	161.283	42.76	0.696364	2.47595	42.76	0.281737	437.616	47.9275	211.363	754.99	546.029	57.3219	12.6813	46.2933	5.53495	2.1221	164.189	211.984	103.637	0	5.51833	32.1923	1.72257	135.386	0.251255	27.3065
UDCA-3S	0	12.191	0.430314	2.68138	0.459075	121.073	74.6363	21.3833	0.283788	0	0	11.5455	28.9407	65.9725	28.4592	5.53127	74.1246	21.3833	4.02381	0	7.14943	35.6687	3.59385	129.332	21.3833	63.1334	7.88911	0	0.765924	131.86	30.4672	300.114	852.513	411.464	12.9623	11.7485	80.744	3.63151	3.01435	135.992	78.187	218.459	0.211111	3.39792	60.7248	17.622	37.5936	0.253384	25.1447
LCA-3S	2.22429	97.18	1.50444	0.373352	0.0827	1091.63	1079.7	3.1639	0.241818	14.5617	319	62.5083	354.968	6.03556	888.181	55.3713	483.269	2.405	42.8031	8.57339	90.5169	779.172	3.97846	13.2094	47.7069	11.5418	75.3641	0.49759	47.7069	82.8203	83.809	52.1432	20.2306	27.8002	1.79255	37.6119	193.68	144.059	24.849	640.463	2.99478	124.961	16.3733	20.7112	194.314	64.0398	637.936	2.52107	305.307
DCA-3S	0	2.05138	0	0	0	600.419	1347.95	1.56856	0	0.264032	178.673	784.929	254.775	329.458	988.646	163.913	325.992	144.827	721.555	229.186	649.5	933.968	575.494	223.984	227.836	2.8465	0.313918	227.836	0.806342	38.0714	9.18858	10.0294	0	0	0	8.9095	132.639	112.667	636.423	226.485	148.116	349.865	124.536	339.859	124.854	999.814	753.892	672.211	786.958
GCA-3S	0.890395	0	0.409427	0.371347	0.243151	1.15132	0.356798	0.465353	0.355	0.739823	0	0	0	0	0	0	0	0	0	0	0	0	0.221538	0	0.464731	0.591818	0.252658	0.692972	0.591759	0.856721	2.14584	11.9713	0.277232	0.95576	0.334135	1.13724	0	0.373333	0	0.464731	1.34522	0.623581	0	0	0	0	0	0	0
TCA-3S	0	0.249247	0	1.15616	0	0	0	0	0	0	0	0	0	0	0	0	0	0	0	0	0	0	0	0	0	0	0	0	0	0.39082	0.766951	0.563068	0	1.5232	0	0	0	0	0	0	0	0	0	0	0	0	0	0	0
GCDCA-3S	0	1.16516	0	1.70057	0	19.2532	0	1.18714	0	0	0	0	1.95371	0	0	0	0	0	0	0	9.85078	1.36738	4.52308	4.93611	0	1.25455	1.44101	0	0	5.15246	2.88891	20.6361	1.16964	1.94885	1.28197	11.2047	0	5.87151	0	1.79495	11.3461	4.32349	0	0	3.13355	0	3.9904	0	2.67302
TCDCA-3S	0	0	0	0	0	2.55211	0	0	0	0	0	0	0.235955	0	0	0	0	0	0	0	0.600622	0.220194	0	0	0	0	0	0	0	2.57869	2.35416	1.61733	0.30914	0.959601	1.51611	2.337	0	0	0	0.268211	2.7513	0.317904	0	0	0	0	0.8992	0	0.234419
GUDCA-3S	0.113559	0	0	0	0	4.05605	0	0	0	0	0	0.756749	0.814831	0	0.517824	0	0	0	0	0	0.948808	0	0.670769	1.9714	0	0	0	0	0	0.598033	0.5258	3.52614	0	0.380492	0.538462	3.13302	0.698667	1.64889	0.570718	1.20842	4.58652	2.25467	0	0	1.68918	0	0.8192	0	0
TUDCA-3S	0	0	0	0	0	0.409211	0	0	0	0	0	0	0	0	0	0	0	0	0	0	0	0	0	0	0	0	0.343544	0	0	0.368525	1.71855	0.366193	0	0.507527	0.424519	0.261827	0	0	0	0	2.07261	0	0	0	0	0	0	0	0
GLCA-3S	3.61215	2.85619	0.67061	2.85619	0.546404	29.0245	2.85619	0.869295	0.573939	1.38673	5.11762	2.23721	27.871	0.876768	15.8956	0.644	18.5177	1.095	2.41483	1.94711	33.8727	15.8241	2.06769	0.717104	2.85619	0.782273	3.90861	0.613052	3.36414	1.17508	8.92921	1.2733	2.85619	2.85619	1.00481	17.6981	3.34133	38.3883	7.18622	12.3436	1.05609	5.55598	0.497778	3.21417	38.8817	1.97146	24.5728	0.474829	9.19767
TLCA-3S	1.15819	0	0	0	0	9.99053	2.62628	0.922199	0	0	0.352079	0.582289	3.80989	0.387475	1.44803	0	3.86885	0.4	0.376976	0.660753	11.4495	5.54835	0.341538	0	0	0.967727	9.83013	0	1.29911	0	9.46397	0	0	0	1.34904	5.78548	0	2.14667	0	3.96421	0	0	0	1.435	3.4977	0	12.9472	0	2.13256
GDCA-3S	0.675706	0	0	0	0.421575	41.4489	0	1.21743	0.307727	0	1.08119	0.15602	5.60944	0.0877	1.97757	0.173091	3.06115	0	0.273171	0.456904	21.6253	3.1534	6.31692	0	0	0.681364	0.472405	0.40241	0.574165	1.64164	3.72857	2.45483	0.411161	0.262366	1.09111	18.8557	1.68	13.8303	3.37608	2.85305	0	8.36576	0	0.4375	0.345792	0	17.104	0	10.2135
TDCA-3S	0	0	0	0	0	1.52632	0.431722	0	0	0	0	0.161592	0.311461	0.144242	0.145272	0	0.336538	0	0	0.335063	5.00518	0.87534	0.175385	0	0	0	0.260506	0	0	0.121311	1.6855	0	0	0	0.2625	2.07166	0	0.161212	0.206316	0.504	0	0.315459	0	0	0	0	2.5632	0	0.732558
[truncated: 29 more columns]

## Sheet: Fig 2
Fig 2a
	humans	rats	mice
CA group/TBA	8.14364	25.3584	16.6459
CDCA group/TBA	36.2813	8.25941	1.98672
MCA group/TBA	0.21798	13.4102	15.6168
UDCA group/TBA	7.1833	1.21502	2.09004
HCA group/TBA	0.877868	0.585774	0.419768
HDCA group/TBA	0.41395	12.0029	1.78175
LCA group/TBA	14.1235	0.118597	0.286108
DCA group/TBA	23.77	0.618823	9.54156
others	8.98847	38.4308	51.6313
Fig 2b
bar chart				pie chart
serous TBAs	unsulfated TBAs	sulfated TBAs		unconj-PBAs%	unconj-SBAs%	conj-PBAs%	conj-SBAs%	unconj-PBA-3S%	unconj-SBA-3S%	conj-PBA-3S%
1723.01	1463.35	259.654		11.5055	23.334	27.5176	10.5689	0.0586423	0.468663	5.5611
3642.07	3318.9	323.174
2855.09	1990.76	864.327
9921.21	9362.11	559.107
4612.47	3498.02	1114.46
2717.78	1898	819.781
5846.28	3643.46	2202.82
2764.34	2426.14	338.199
2068.68	865.02	1203.66
4276.37	3039.88	1236.48
2913.01	2107.15	805.857
2891.87	1881.86	1010.02
1407.07	1136.81	270.263
7438.95	6623.84	815.113
8207.97	6923.1	1284.87
4902.11	3650.47	1251.64
5081.38	1786.17	3295.21
3382.39	2775.3	607.093
3374.57	2271.21	1103.37
4820.28	3863.56	956.717
1763.05	999.547	763.502
4867.29	3666.77	1200.52
7883.54	6795.49	1088.05
3297.14	2871.58	425.561
953.01	741.167	211.844
3769.13	1827.14	1941.99
2816.44	1605.13	1211.31
1800.56	591.233	1209.33
1431.98	783.349	648.633
3266.13	2999.55	266.579
3291.12	2511.11	780.015
5976.89	5247.1	729.783
6896.98	5626.17	1270.82
5710.52	5298.09	412.435
3295.61	2980.99	314.617
5462.01	4797.94	664.071
11914.3	8218.61	3695.67
7921.63	5572.41	2349.21
3809.58	2385.8	1423.79
4651.53	3562.85	1088.68
4943.8	3958.95	984.852
2861.92	2174.67	687.247
8885.24	5841.72	3043.52
4371.36	3149.5	1221.85
4576.44	3180	1396.43
3987.25	3133.27	853.978
5087.76	3431.54	1656.22
3993.9	3013.83	980.077
4035.83	2757.9	1277.93
6929.28	3491.12	3438.15
Fig 2c
bar chart				pie chart
serous TBAs	unsulfated TBAs	sulfated TBAs		unconj-PBAs%	unconj-SBAs%	conj-PBAs%	conj-SBAs%	unconj-PBA-3S%	unconj-SBA-3S%	conj-PBA-3S%	conj-SBA-3S%
15734.4	15723.1	11.2267		42.2384	40.7443	4.73667	12.1674	0.00487531	0.0209156	0.0480892	0.0392272
9875.22	9842.61	32.6123
30528.9	30483.6	45.2984
50529.1	50469.4	59.7207
29943.6	29898.8	44.8121
31254.7	31221	33.678
40680.7	40631.9	48.7665
16232.1	16219	13.1366
25099.5	25078.5	21.0059
24286.9	24265.8	21.1603
15003.8	14991.5	12.3526
23935.3	23917.6	17.6633
31721.6	31705	16.6803
27200.8	27179.7	21.1074
Fig 2d
bar chart				pie chart
serous TBAs	unsulfated TBAs	sulfated TBAs		unconj-PBAs%	unconj-SBAs%	conj-PBAs%	conj-SBAs%	unconj-PBA-3S%	unconj-SBA-3S%	conj-PBA-3S%	conj-SBA-3S%
11441.9	11433.6	8.39435		11.9259	28.0478	21.9375	37.6715	0	0.000759728	0.385996	0.0305119
10938.6	10933.6	5.00345
5326.36	5322.38	3.9741
5420.77	5416.71	4.0625
1174.86	1174.86	0
13013.4	13007.2	6.22785
7886.45	7882.91	3.53768
4525.12	4512.22	12.8971
3289.02	3245.81	43.2082
4433.96	4392.58	41.3815
8337.85	8288.66	49.1919
1941.52	1925.47	16.0492
4802.26	4764.62	37.6419
4563.6	4529.46	34.1315
Fig 2e
	humans
CA	27.9369	208.94	47.298	72.0757	52.1961	36.2835	50.4472	163.39	19.4035	146.279	18.3374	30.9192	41.1527	358.383	315.888	212.047	34.5683	57.0354	29.2349	42.255	27.8844	370.767	83.9238	67.4919	17.495	70.3332	107.726	18.1977	22.6275	96.6591	377.726	427.244	23.6183	201.303	58.1617	151.829	133.164	114.865	238.599	52.308	369.378	57.0817	111.772	124.338	143.385	159.424	26.1743	181.991	47.8945
CDCA	146.492	608.975	93.7227	604.063	92.032	143.527	60.653	249.842	5.1182	367.026	122.246	161.636	60.3773	538.994	713.591	159.148	41.7049	267.309	170.341	35.4783	73.5204	604.064	692.914	578.979	229.556	86.4661	253.884	36.5483	99.7645	1221.84	386.678	1182.19	626.246	773.565	274.785	321.8	785.451	1026.28	229.941	577.373	1160.4	190.856	592.804	308.261	744.037	477.052	772.709	305.291	54.1082
α-MCA	0	0	0	9.6555	0	0	6.4338	0	7.8329	9.3076	0	0	0	0	0	6.3538	0	0	0	0	0	0	0	0	0	0	0	0	0	0	0	0	0	5.4564	0	7.5514	0	0	0	0	0	0	5.1458	0	0	0	0	0	0
β-MCA	0	0	0	0	0	0	0	0	0	0	0	0	0	0	0	0	0	0	0	0	0	0	0	0	0	0	0	0	0	0	0	0	0	0	0	0	0	0	0	0	0	0	0	0	0	0	0	0	0
HCA	4.325	11.1847	1.7647	32.8947	2.3136	3.7907	7.3153	11.7706	4.8774	22.8765	4.5308	2.9499	4.9105	51.6718	25.6928	15.8659	7.2812	15.2444	9.5921	14.9051	6.5543	27.6476	17.8376	8.0161	14.452	15.4588	38.8373	3.5461	1.5574	10.6779	28.7386	59.8877	17.3762	28.2465	9.4838	18.0333	40.724	23.0624	13.4776	5.9748	47.9658	13.2425	12.3172	37.6312	23.5725	16.2186	7.1011	23.1033	3.2668
HDCA	1.1616	1.2406	2.519	4.2429	7.3769	2.5788	13.7191	4.4944	21.6435	8.3173	6.5122	1.7712	3.2773	6.8174	7.1529	11.6281	4.0752	7.8905	1.2187	8.065	9.2914	16.4127	4.0282	2.0626	3.5343	7.7712	3.1954	10.4115	3.5126	2.1592	2.8733	6.5299	6.5299	6.5299	3.4396	4.6676	12.9491	7.5736	22.1467	4.5001	15.218	5.1492	17.8808	41.7184	6.5299	5.7533	14.741	12.9906	12.0474
UDCA	42.1904	58.4033	59.4753	119.496	90.6193	51.2337	68.5461	67.2758	93.5882	70.088	71.7367	60.6821	29.1465	274.493	204.162	161.149	22.4103	111.209	34.2546	23.1449	35.2256	136.993	177.712	169.324	37.7175	77.2378	36.3415	28.5063	40.6988	205.261	135.935	508.397	449.013	531.893	118.844	138.586	313.568	133.97	59.2865	136.561	423.698	87.6051	161.089	93.5882	281.706	178.713	124.509	202.751	45.0528
LCA	5.097	6.7474	15.2296	3.3302	31.124	11.7795	15.7065	4.6302	9.7027	14.8677	25.8623	31.3239	15.5033	24.9498	42.6538	33.6311	15.0246	18.6421	21.1087	21.9787	18.0221	20.6393	26.1847	3.6188	7.8858	13.7474	14.087	14.3354	7.9367	2.8528	15.8538	4.2538	1.6585	1.7879	17.4227	9.7518	62.0422	39.3338	34.3188	21.7567	4.3747	14.1102	47.5079	22.5821	21.4736	26.4819	43.0548	44.2405	25.7544
7-ketoLCA	1.7568	8.072	3.6902	9.7234	3.9336	2.8387	3.2833	6.6858	0	9.3701	1.6734	1.7729	0	16.1729	17.4515	8.6652	0	16.4988	2.2091	2.3399	2.9227	12.9185	17.086	7.9738	0	1.2301	1.48	6.2712	2.3511	7.6772	8.0405	24.3186	23.8748	11.8272	22.9207	6.2712	13.647	9.0833	2.095	5.6747	15.751	4.6222	23.9219	6.0002	13.2039	7.0157	3.4644	13.4298	0.5652
12-ketoLCA	5.8413	6.3206	8.6546	0	58.9214	6.5025	46.1236	7.1408	14.1695	19.0515	11.0559	10.2131	6.8362	15.5069	20.9391	25.8083	6.8461	6.3424	0	8.7531	9.0016	26.7109	12.1257	0	0	10.1863	0	10.258	0	0	9.7071	0	0	0	11.1811	0	27.0054	70.3948	10.6556	6.2986	0	5.1336	45.5918	9.0852	6.7886	11.2316	17.1557	23.9198	10.3577
DCA	178.658	409.962	408.523	54.7946	1049.98	232.63	484.968	421.791	207.2	488.654	613.838	377.742	210.331	1088.8	843.759	777.422	145.907	232.022	122.724	301.182	188.32	876.107	626.185	19.1446	69.8766	290.38	188.811	99.3136	146.125	85.7278	289.031	103.733	15.6161	16.9349	342.769	319.518	870.769	1345.06	413.942	541.186	1.7036	248.664	1638.18	262.258	792.999	627.054	861.132	715.374	475.789
23-norDCA	3.4727	1.5643	1.9612	3.4727	4.3945	2.2683	6.6852	4.3658	6.0656	3.5051	5.3903	3.4727	3.9505	2.4238	5.883	12.4263	3.4727	2.9711	3.4727	2.9601	4.5005	6.9665	2.4574	3.4727	0.6761	2.1953	3.4727	5.8373	3.4727	3.4727	1.7336	3.4727	3.4727	3.4727	0.6714	3.4727	7.1074	5.773	2.7924	3.4727	3.4727	3.4727	10.07	2.8209	4.5867	3.2922	2.6309	4.8869	2.4919
7-ketoDCA	0	0	0	0	0	0	0	0	0	0	0	0	0	0	0	0	0	0	0	0	0	0	0	0	0	0	0	0	0	0	0	0	0	0	0	0	0	0	0	0	0	0	0	0	0	0	0	0	0
3-ketoCA	0	0	0	5.0204	0	0	0	0	0	0	0	0	0	5.8311	0	0	0	0	0	0	0	0	5.8178	7.4375	0	0	0	0	0	0	5.2687	8.7304	0	7.3508	0	0	0	0	0	0	11.113	0	0	0	0	0	0	0	0
allo-LCA	0	0	0	1.1291	6.268	0	1.5707	0	20.9428	3.0251	0	5.3827	1.1496	0	8.0918	8.1008	1.1291	0	0	1.2752	2.4347	2.4807	0	0	0	2.6244	0	3.0768	2.0171	0	0	0	0	0	0	0	5.9379	5.435	1.5768	0	0	0	8.2306	1.1086	1.7401	3.1679	3.6195	3.3167	4.9702
iso-LCA	5.2094	2.374	21.3683	1.5665	21.2614	10.5062	16.1514	4.2444	17.6097	28.9732	28.4345	37.2891	24.0779	24.5988	84.0579	87.3625	13.1533	27.3736	9.0408	29.7744	38.8944	40.5289	13.6906	0	1.9783	39.0702	11.8387	21.0907	9.8868	1.9326	24.1844	4.5136	0	0	23.4376	19.1408	143.915	61.8308	53.532	27.3476	0	12.1088	133.657	24.8742	37.7676	89.4444	88.7757	70.2213	41.2934
6-ketoLCA	2.7367	2.9714	2.5918	3.0041	2.9416	2.4258	2.8944	2.1352	3.285	3.6434	4.2337	4.6044	2.4983	3.2678	2.9713	2.2373	2.3118	4.5815	3.3311	3.1999	2.8023	3.2999	3.6233	3.4929	2.9526	3.5985	2.6622	3.4864	2.5954	2.3669	4.0788	3.6392	2.7745	3.1581	2.4694	3.0543	5.4315	4.7867	4.5643	4.2796	3.3974	2.8847	3.7191	4.1848	3.2661	4.2261	3.6532	3.0824	2.9596
beta-HDCA	0	0	2.6819	0	5.6281	1.0597	12.4631	2.4352	23.2548	4.3491	4.0702	7.0893	2.1753	1.4078	5.4094	7.7436	3.0232	4.6651	1.0497	2.8153	6.9172	11.5406	2.3393	3.7454	3.7454	3.4659	4.808	7.8078	1.8261	3.7454	5.187	3.7454	3.7454	3.7454	3.0717	2.5725	10.4229	3.3845	2.7773	1.4335	1.6104	4.2452	8.6986	3.1405	2.637	8.7967	9.1513	5.9208	4.0249
beta-UDCA	139.907	73.741	163.984	235.532	55.6073	168.855	85.3962	52.3757	52.8501	49.3888	294.567	116.622	80.5466	376.311	251.868	296.337	124.984	393.671	38.6745	48.0436	84.0806	147.233	269.114	441.047	46.3668	168.195	75.5724	30.6818	62.2377	466.604	423.85	1774.79	1297.84	1816.16	915.339	474.15	487.487	116.987	197.274	298.928	800.119	519.325	116.153	212.032	261.674	411.201	181.705	373.305	79.5669
6,7-diketoLCA	0	0	0	0	0	0	0	0	0	0	0	0	0	0	0	0	0	0	0	0	0	0	0	0	0	0	0	0	0	0	0	0	0	0	0	0	0	0	0	0	0	0	0	0	0	0	0	0	0
12-ketoCDCA	0	0	0	0	0	0	0	0	0	0	0	0	0	0	0	0	0	0	0	0	0	0	0	0	0	0	0	0	0	0	0	0	0	0	0	0	0	0	0	0	0	0	0	0	0	0	0	0	0
ω-MCA	2.4182	4.0349	1.2332	7.3673	2.425	2.2705	5.0842	6.1617	1.9625	4.542	1.8167	1.5956	2.2355	5.5286	5.3306	6.533	2.8959	3.0616	3.9638	2.2419	1.6851	20.0168	5.132	6.4374	2.9524	3.08	3.1246	1.0724	0.4361	5.7842	7.2147	14.6667	3.7577	15.5865	5.5035	7.7426	6.9539	7.8743	3.4065	2.4609	12.6082	3.5391	5.2183	3.9638	5.7426	5.7178	1.5541	6.4991	1.7309
muroCA	0	0	0	0	0	0	0	0	0	0	0	0	0	0	0	0	0	0	0	0	0	0	0	0	0	0	0	0	0	0	0	0	0	0	0	0	0	0	0	0	0	0	0	0	0	0	0	0	0
UCA	0	0	0	0	0	0	0	0	0	0	0	0	0	0	0	0	0	0	0	0	0	0	0	0	0	0	0	0	0	0	0	0	0	0	0	0	0	0	0	0	0	0	0	0	0	0	0	0	0
ACA	0	0	0	0	0	0	0	0	0	0	0	0	0	0	0	0	0	0	0	0	0	0	0	0	0	0	0	0	0	0	0	0	0	0	0	0	0	0	0	0	0	0	0	0	0	0	0	0	0
GCA	126.294	531.169	143.675	1212	263.358	165.29	392.008	106.811	47.3374	233.243	66.2532	163.206	65.3167	439.656	280.286	160.673	99.3977	134.037	127.451	599.391	40.8234	35.6168	460.99	426.308	16.3259	139.507	85.0936	39.8643	47.1942	91.3289	74.2676	126.204	196.573	200.155	153.465	355.068	662.937	226.242	94.4029	255.275	158.867	237.225	371.028	170.564	120.323	128.472	112.282	137.308	216.318
TCA	15.6427	50.9649	28.182	36.0547	44.8324	75.876	127.419	23.2341	4.9711	23.4798	4.955	28.4191	7.2414	62.5983	19.7939	15.4613	12.9413	12.3237	7.6044	120.261	9.2676	7.8501	64.6225	61.3151	5.943	10.3249	16.6767	18.722	9.4465	10.713	5.8911	14.9313	46.5056	49.6438	25.7249	58.6395	42.3512	11.0095	10.1285	23.9413	8.576	37.1307	18.1111	10.2072	7.0992	6.1921	19.4722	11.2688	25.959
GCDCA	541.443	905.152	501.324	5890.08	968.43	523.569	1029.92	707.031	95.9371	870.665	366.873	426.126	311.009	2202.94	2674.06	807.987	638.452	950.77	1361.17	1476.94	250.254	713.792	2814.47	821.011	197.39	564.477	475.947	126.026	181.035	598.756	488.531	643.992	1679.62	1049.86	645.218	1775.78	2482.34	1426.86	648.076	938.048	531.051	412.772	1185.78	1217.41	387.658	562.716	617.249	528.751	851.203
TCDCA	47.5883	75.1948	46.6101	118.842	100.152	100.9	276.248	81.8135	6.2835	120.903	13.1318	45.8719	13.9824	272.035	145.099	54.0228	54.3331	75.9777	65.1676	242.776	31.5369	58.5285	276.43	80.2126	26.302	28.1815	54.1058	22.5932	13.1885	74.5618	31.8553	55.459	233.814	123.256	112.219	289.988	195.425	65.2034	18.2381	76.8381	22.4676	45.5879	54.9444	73.6096	12.9045	10.3687	87.6575	31.9808	80.6977
T-α-MCA	0	14.2413	11.7161	0	11.8637	8.957	13.6151	9.6573	9.28069	19.2257	9.7363	9.921	7.7033	7.5287	6.6165	9.9263	16.3768	6.1961	0	10.8028	9.6441	11.7534	8.6092	0	0	0	13.5507	11.8637	5.1253	0	0	0	0	7.5287	0	3.9338	15.1765	7.2857	0	0	0	5.0064	14.6332	5.9069	0	0	15.4768	0	10.6582
T-β-MCA	0	10.3913	0	0	0	0	0	0	0	0	0	0	0	0	0	0	0	0	0	0	0	0	0	0	0	0	0	0	0	0	0	0	0	0	0	0	0	0	0	0	0	0	0	0	0	0	0	0	0
GHCA	8.6258	18.351	11.504	96.8865	7.5282	12.9083	20.6219	2.9019	39.3537	30.4262	10.3077	20.7369	4.3638	13.7618	20.4563	12.8842	18.6497	15.1105	24.9551	28.8661	14.0651	2.8785	26.6899	11.095	10.502	18.4747	23.8532	8.2954	14.1368	2.2382	3.4932	22.7977	50.0617	18.2188	12.2418	17.5353	48.2173	19.0723	5.774	30.1486	10.1251	9.6125	25.4678	35.4788	10.8236	17.7629	27.9631	8.1316	23.9369
THCA	0	0	0	12.4045	6.1964	0	7.218	0	0	0	0	0	0	0	0	0	0	0	0	0	0	0	0	0	0	0	0	0	0	0	0	0	0	0	0	0	5.6956	0	0	0	0	0	0	0	0	0	0	0	0
GHDCA	3.4337	4.2791	4.7805	26.4316	3.6251	4.7098	3.7389	3.7262	3.2177	4.2633	5.441	4.4609	1.9131	9.353	13.0758	6.7062	4.6031	6.8224	3.3853	4.3375	1.4765	6.0023	15.9874	7.0894	1.5937	5.5759	2.6975	0	1.1468	4.6199	6.0171	12.6598	44.3606	19.5231	4.2712	15.4692	24.3744	5.0492	3.6583	7.7346	5.3408	5.0437	6.7671	45.1357	3.187	7.3671	3.4117	3.8222	6.1659
THDCA	0	1.6614	0	2.5062	2.1447	1.7622	2.2211	1.8243	1.1826	2.3139	1.3311	1.2094	0	1.788	1.8297	1.8847	0	1.3721	1.3477	1.698	0	2.1895	1.7876	1.3893	1.3344	0	0	1.6543	1.2751	1.3278	0	2.3916	0	0	0	0	0	0	1.4147	1.7489	0	1.5569	1.4966	5.4058	0	1.3592	1.4912	1.335	1.3709
GUDCA	50.6818	36.8667	73.4306	523.727	56.1005	59.1651	50.1032	51.7847	6.1111	44.4626	83.9093	45.4488	22.7213	208.202	222.932	66.8239	77.3264	131.375	45.7864	42.487	9.6043	62.9099	230.441	101.49	15.8131	72.2816	31.7679	4.638	15.0753	65.7714	63.5434	191.778	833.708	354.667	64.9492	232.137	576.359	64.7547	55.3579	145.261	99.9519	79.9453	91.4103	161.708	91.8854	117.331	54.2881	70.5295	42.2473
TUDCA	4.0383	1.3516	1.9633	31.0051	13.3868	2.2109	3.0428	1.441	0	2.0539	1.7471	2.0383	0	8.1498	5.6591	0	2.1492	3.3252	0	1.6525	0	0	4.1461	2.3741	2.0572	0	0	0	0	1.196	1.158	4.8507	27.2344	9.8199	4.298	7.766	18.0042	1.1618	0	6.2678	3.013	2.9879	0	2.6884	0	0	1.5319	1.0744	1.117
GLCA	1.6024	0	12.7479	0	13.0177	7.691	8.0489	0	1.6289	6.0013	7.0411	14.6009	11.1714	9.8695	24.0869	26.6513	2.5014	7.5708	8.4276	4.5123	8.1458	17.5514	18.9114	0	0	3.113	1.4547	1.6726	3.6127	0	2.5976	0	0	0	2.35	11.6233	26.634	15.1272	24.0871	14.2495	0	0	19.4851	5.1498	3.955	5.6949	19.2295	34.8873	14.5504
TLCA	0	0	0	0	9.6036	1.4943	2.922	0	0	1.2621	1.0397	1.099	0	0	2.92	2.0013	0	0	0	1.5932	0	1.447	1.5588	0	0	0	0	0	0	0	0	0	0	0	1.0595	1.5287	2.2793	1.357	0	1.2853	0	0	2.1871	0	0	0	2.239	1.1922	1.3279
GDCA	86.3228	208.593	283.237	180.769	465.198	198.954	755.749	375.599	121.975	358.214	307.079	238.334	190.901	536.901	903.291	603.031	393.863	236.778	164.095	664.824	96.4847	383.55	828.5	16.8376	18.2326	149.214	134.429	42.9691	70.2897	21.609	93.9139	34.2512	15.9034	15.6505	103.774	458.45	1125.96	718.797	223.429	338.064	223.429	149.473	1049.7	239.688	177.146	222.909	260.755	175.455	586.181
TDCA	10.4789	23.6664	36.8901	37.9902	45.5611	55.96	38.5437	51.5749	18.2349	70.1055	14.0002	25.317	12.3193	55.8934	48.0896	49.9546	36.7842	25.1244	11.602	115.008	16.1871	38.3726	82.174	20.2155	6.4832	40.9522	19.7137	12.4931	14.7775	10.6651	13.7374	7.6675	22.867	22.7481	41.9204	81.8846	66.2733	34.8066	10.8444	34.4314	25.317	16.2898	58.753	18.9672	13.9131	18.3047	47.3608	17.767	84.2906
T-ω-MCA	0	32.4842	0	26.0421	0	0	24.6036	0	0	0	0	0	0	0	0	0	0	0	0	0	0	0	0	0	0	0	0	0	0	0	0	0	0	0	0	0	0	0	0	0	0	0	0	0	0	0	0	0	0
Fig 2f
	humans
CA-3S	0	0	0	0	0	0	0	0	0	0	0	0	0	0	0	0	0	0	0	0	0	0	0	0	0	0	0	0	0	0	0	0	0	0	0	0	0	0	0	0	0	0	0	0	0	0	0	0	0
CDCA-3S	0	0	1.5785	0	0	1.054	1.5785	2.1885	1.5785	2.0507	1.2297	1.0384	0	11.9529	5.8055	2.3887	2.872	1.8715	5.69	0	1.1086	5.163	4.8756	1.3425	0	1.2704	1.4814	0	0	1.39	6.0438	4.805	1.8553	1.9186	1.5785	1.0047	5.2166	6.7608	1.5026	1.5739	22.4572	2.4798	2.6703	3.8154	4.782	2.7654	0	5.7193	0
UDCA-3S	0	1.1777	1.0435	1.7602	0	1.0046	2.1257	1.9261	0	1.2767	1.5302	1.1762	0	5.2369	2.2539	2.0762	1.866	1.6837	1.0575	0	0	2.9955	2.8045	2.791	0	2.0663	1.3292	0	0	3.0868	4.4688	4.6983	7.1346	6.1626	1.3345	2.5154	8.1821	1.6917	2.5315	1.4427	16.0737	2.2976	2.5698	2.057	6.3291	2.7391	1.9898	6.0996	0
LCA-3S	1.5832	1.7057	3.3463	0	15.2836	7.5543	18.5249	9.4455	7.7121	13.5193	12.1047	7.3374	4.2237	26.2194	96.3391	81.1914	34.7672	13.9028	16.375	5.4102	5.4974	145.882	18.5324	0	1.0759	9.9753	5.3011	3.3882	3.4343	0	23.041	2.4739	0	0	1.1228	3.7744	50.3406	53.1978	27.2954	8.6325	0	4.33	56.2651	11.5872	26.0888	10.6205	16.9321	21.9178	12.9934
DCA-3S	0	0	0	0	2.85491	1.38217	5.34798	2.66849	1.28187	2.59633	2.75969	0	1.17396	4.52951	3.25568	5.41442	5.28132	1.27404	1.5997	0	0	10.9008	2.63865	0	0	1.12	0	0	0	0	2.43086	0	0	0	0	0	5.1715	8.88466	1.70994	1.24505	0	1.34324	4.06589	1.64794	3.86551	1.97719	1.5487	4.61923	2.20022
GCA-3S	1.5957	1.1875	1.1766	2.4183	1.8787	1.4842	10.5677	0	2.4175	1.9609	1.0641	1.2432	0	1.6558	0	1.577	4.4035	1.2622	1.6335	1.9317	0	0.942	2.5574	6.2652	0	2.6447	2.2599	2.4957	0	1.8475	2.1215	1.9698	2.7898	1.3404	1.2389	1.6555	4.7947	3.8092	1.5643	1.7937	4.6885	2.1495	3.1806	2.8591	2.2133	2.5942	1.6304	1.6386	1.3839
TCA-3S	1.0674	2.2831	1.0468	1.1067	1.2309	1.054	3.2972	0	0	1.0454	0	1.0614	0	1.1073	0	1.0923	1.2566	0	0.9208	1.1845	0.9712	0	0	1.2211	1.034	1.0163	1.1714	1.1024	0	1.0157	0	0	1.1659	0	0	0	0	1.0068	0	0	1.0146	1.006	0	0	0	0	1.2916	0	0
GCDCA-3S	81.1917	136.2	103.181	397.107	68.9488	182.124	276.057	57.7441	151.844	219.413	78.24	143.594	32.2488	225.23	158.958	115.928	329.985	100.655	326.361	174.182	116.081	82.8101	295.871	248.549	93.4322	411.221	283.411	236.977	125.111	114.98	162.152	348.041	493.013	207.461	97.8221	152.048	366.354	232.459	159.378	212.895	566.102	187.704	243.559	282.437	194.242	166.027	194.642	152.019	145.571
TCDCA-3S	9.5889	7.8251	7.3047	32.9909	11.1434	19.0728	43.346	6.236	17.0555	12.7646	6.5914	11.0143	4.2545	19.6108	8.757	9.567	31.1229	8.1506	16.0541	16.5086	19.1452	8.1112	12.1423	15.1761	9.3083	17.3545	31.5004	26.9909	11.9701	8.9065	9.4529	20.348	34.4681	13.7798	13.3483	13.3325	16.9443	10.333	8.8249	14.5827	21.5786	12.3428	11.0577	18.6183	9.2009	6.4136	18.3382	9.6673	10.2926
GUDCA-3S	26.2586	17.016	31.6401	52.9907	15.1022	42.0852	78.2989	23.3914	13.1475	32.561	23.3968	24.9353	6.9648	107.535	35.0974	29.8351	66.7253	45.7585	18.9832	11.5113	11.1141	33.7925	69.3001	132.072	35.0695	75.1546	34.7411	31.7581	14.4261	93.069	91.9684	232.942	700.089	165.267	24.422	133.111	210.112	38.6714	38.5624	40.6376	289.623	84.9193	56.0827	86.6706	106.099	86.0847	30.0682	56.1938	23.5849
TUDCA-3S	2.0614	1.3631	2.5603	2.9281	1.7812	3.4763	8.699	1.543	1.4516	2.2548	1.4618	2.0682	1.1058	5.488	1.6662	1.6431	4.451	2.0652	1.3612	1.3988	1.7403	2.3508	2.298	6.3585	3.0513	2.6949	3.3724	2.8908	1.6154	4.7692	3.5184	7.8829	28.2004	7.1067	2.7519	6.8139	6.4302	1.6035	2.107	2.2942	7.4261	3.5629	1.8079	3.5379	2.7025	1.8074	2.2621	2.0114	1.7581
GLCA-3S	71.3347	83.5099	377.239	29.3815	406.619	243.888	505.132	101.259	440.674	530.389	407.501	449.438	133.103	231.518	722.633	594.92	1360.27	308.865	484.507	455.541	343.175	492.663	351.441	9.6709	26.6864	950.256	484.013	465.932	234.07	18.7156	317.378	45.8175	0	0	86.8952	202.23	2132.92	1222.02	912.637	489.531	0	200.359	1689.53	567.92	736.807	331.055	891.092	423.82	610.426
TLCA-3S	16.2536	7.0917	76.7025	7.7899	133.375	104.25	206.144	30.4679	96.7518	98.6853	52.0457	90.4279	10.9427	36.192	87.2565	100.549	342.762	25.3178	91.4668	53.6963	116.923	135.097	32.6156	0	12.6237	147.038	171.102	151.009	76.7301	0	41.3877	8.7984	0	0	21.2713	31.7824	218.534	81.8912	53.7774	63.2912	53.7774	32.5814	203.716	47.3805	35.8788	23.7975	159.139	47.06	145.507
GDCA-3S	44.4474	59.7741	243.265	27.1602	417.452	193.32	947.346	93.5591	444.626	304.659	208.774	261.906	71.3226	129.439	156.641	291.821	1052.08	91.1554	130.95	222.808	133.834	260.021	283.154	0	25.46	308.342	178.212	258.785	167.997	15.6875	108.576	47.6687	0	0	56.9299	107.326	651.442	670.533	207.422	239.725	0	144.076	750.152	185.848	262.279	213.461	316.605	242.019	306.998
TDCA-3S	4.2714	4.0398	14.242	3.4737	38.7878	18.0315	96.3507	7.7697	25.1151	13.3084	9.158	14.7774	4.9231	9.3988	6.2056	13.6391	57.3679	5.1307	6.4078	12.5453	13.9125	19.7919	9.815	2.1135	4.1023	11.8365	13.4181	27.9988	13.279	3.1117	7.4766	4.3377	2.1033	9.3988	5.9019	8.4767	19.229	16.3504	6.4743	11.0329	2.1106	8.0946	18.8612	7.4733	5.9429	4.6359	20.6779	7.2928	17.2117
Fig 2g
	humans
TBAs	2.444	1.42458	1.36056	5.06306	0.931748	1.76609	1.00302	1.21012	1.30204	1.59638	1.32741	1.52257	1.31186	1.75862	2.17757	1.28584	1.75067	3.23268	4.55307	1.31261	2.31285	1.42047	2.21405	4.21846	4.75389	2.66695	2.75034	2.41158	1.89167	8.55461	2.35085	6.66061	19.8611	9.81542	3.16872	2.53227	2.31948	1.50912	2.14501	2.09591	5.10593	2.15883	1.20266	3.2578	1.98381	1.872	2.04371	1.66328	1.28436
PBAs	4.78913	2.18156	3.40468	5.32092	3.41326	3.46532	2.89135	3.76524	3.74772	3.92313	6.49281	3.51027	3.71004	3.78823	6.01699	2.93985	7.1999	6.8638	11.6562	2.54356	6.22758	3.54662	6.69295	3.10214	13.6279	4.95461	5.16763	5.5875	5.43811	10.0238	2.35804	3.95344	11.3393	4.79583	4.79889	4.50281	4.56774	7.75468	3.09248	5.46418	4.28377	2.54561	4.14768	6.18294	4.95503	4.13015	10.5103	3.1108	3.91649
SBAs	1.21018	0.574591	0.902591	3.97145	0.486136	1.08889	0.530943	0.426937	1.08215	0.835182	0.92428	1.03759	0.760869	0.802722	0.975333	0.917204	1.26011	1.98256	1.86479	0.598824	1.63097	0.867285	0.724706	13.2914	1.85365	2.03012	1.79373	1.84097	1.21581	6.4435	2.34452	14.018	58.3257	39.8736	2.46406	1.39077	1.62907	0.713021	1.76816	1.13564	6.77559	1.93235	0.782073	2.00436	1.34038	1.25828	1.14224	1.25136	0.764142
[truncated: 29 more columns]

## Sheet: Fig 3
Fig 3a
	humans	rats	mice
CA group/TBA	5.64343	26.2338	9.33333
CDCA group/TBA	20.8068	0.424875	5.01222
MCA group/TBA	1.22564	9.31688	16.3284
UDCA group/TBA	5.68036	0.263947	1.53896
HCA group/TBA	0.655643	0.307596	8.33643
HDCA group/TBA	0.110896	1.07541	15.3969
LCA group/TBA	19.3522	0.132967	0.69328
DCA group/TBA	34.5119	1.327	3.77511
others	12.3928	64.3701	42.0261
Fig 3b
bar chart				pie chart
urinary TBAs	sulfated TBAs	sulfated TBAs		unconj-PBAs%	unconj-SBAs%	conj-PBAs%	conj-SBAs%	unconj-PBA-3S%	unconj-SBA-3S%	conj-PBA-3S%	conj-SBA-3S%
629.565	59.2472	570.318		4.75456	13.149	1.97578	1.03488	0.690873	1.51718	20.2263	56.6515
785.721	60.0871	725.634
366.721	99.1587	267.562
768.588	221.221	547.366
686.778	110.548	576.231
443.661	95.0273	348.633
2548.5	103.99	2444.51
367.936	162.221	205.716
744.986	93.451	651.535
393.987	26.9938	366.994
1125.68	214.208	911.47
493.825	117.897	375.928
579.485	353.334	226.151
371.774	74.4123	297.361
629.715	304.968	324.747
183.041	78.2781	104.763
277.935	26.6219	251.313
342.612	89.22	253.392
990.293	55.5863	934.707
178.877	29.8574	149.02
866.587	59.7284	806.859
148.664	38.317	110.347
637.617	19.6044	618.013
366.013	45.7844	320.229
1029.12	140.001	889.122
675.362	41.2979	634.064
476.975	56.7313	420.244
324.493	40.3502	284.143
1234.11	645.718	588.39
376.05	60.8008	315.249
1130.04	42.8586	1087.18
586.627	194.379	392.247
1061.47	153.395	908.072
573.426	208.816	364.61
950.773	115.229	835.544
539.666	210.458	329.208
731.795	20.9901	710.804
745.708	35.8852	709.823
368.121	57.7656	310.356
508.07	40.9176	467.153
301.096	22.523	278.573
755.367	29.0509	726.316
385.584	16.0293	369.554
240.631	124.893	115.737
332.686	39.2985	293.388
704.304	321.318	382.986
604.996	58.344	546.652
342.115	233.357	108.758
132.858	47.8439	85.0138
Fig 3c
bar chart				pie chart
urinary TBAs	sulfated TBAs	sulfated TBAs		unconj-PBAs%	unconj-SBAs%	conj-PBAs%	conj-SBAs%	unconj-PBA-3S%	unconj-SBA-3S%	conj-PBA-3S%	conj-SBA-3S%
3357.36	3224.6	132.76		29.3236	61.9298	4.8677	1.60073	1.0236	0.0699587	0.755522	0.429131
4933.61	4760.7	172.908
3176.45	3043.71	132.743
4644.41	4527.73	116.678
15340.4	14911.2	429.172
5046.88	4924.74	122.135
4555.67	4405.03	150.638
560.623	556.23	4.39262
5956.35	5944.57	11.7747
2649.15	2593.17	55.9741
5906.12	5743.48	162.643
4342.79	4239.37	103.413
584.131	580.692	3.43915
823.144	819.83	3.31406
Fig 3d
bar chart				pie chart
urinary TBAs	sulfated TBAs	sulfated TBAs		unconj-PBAs%	unconj-SBAs%	conj-PBAs%	conj-SBAs%	unconj-PBA-3S%	unconj-SBA-3S%	conj-PBA-3S%	conj-SBA-3S%
5490.43	5435.86	54.5704		22.6881	54.6106	5.20144	14.1829	0	0.629172	2.66519	0.0225835
6138.56	6074.66	63.8977
5615.05	5600.57	14.4836
13705.4	13533.3	172.079
379.384	375.769	3.61503
3608.2	3560.37	47.822
4118.28	4052.13	66.1491
3490.29	3411.21	79.0793
524.659	501.362	23.2968
1789.49	1727.28	62.2167
420.025	387.383	32.642
1107.89	1076.63	31.2588
349.901	301.818	48.0838
1014.14	968.644	45.5008
Fig 3e
	humans
CA	14.844	9.47531	37.8516	51.0894	29.0483	8.37149	18.5167	68.2476	21.8978	0.682589	100.684	30.6168	6.7567	30.7261	78.8036	13.2115	6.5484	25.6184	1.38411	7.07116	1.72447	8.19297	0.803176	6.81288	65.9568	13.202	31.2014	4.15857	85.8711	8.81097	11.3103	97.7766	18.8839	67.2183	0	58.455	1.42201	8.42777	3.18918	5.0843	4.41389	0.427093	0.572283	15.3986	6.67073	1.37271	0.838252	10.2271	10.2739
CDCA	0	0	0	0.518784	2.36812	0	0	0.468628	0	0	0	0.687036	0	1.22258	0	0	0	0.534627	0	0	0	0.188869	0	0.208156	1.66085	0	0	0	2.37811	0	0	1.6717	0.111265	2.04718	0	0.375146	0	0	0	0	0	0	0	0.420419	0.151724	0.0915256	0	0.167894	0
α-MCA	0.298343	0.239295	0.382358	0.761291	0.266313	0.652096	0.808112	0.827021	0.503385	0.334128	1.45934	0.250288	0	0.203025	0.951187	0.236591	0.366094	0.242697	0.395828	0.198459	0.208437	0.146192	0.422964	0.331089	0.715692	0.294086	0.234936	0.309851	0.232108	0.211417	0.362576	0.787126	0.421108	0.525395	0	0.79411	0.178188	0.113029	0.288037	0.132444	0.147454	0.10334	0.139631	0.124286	0.217378	0.138424	0.173532	0.21479	0.121336
β-MCA	0.923139	0.8174	2.82198	4.4989	1.4198	2.16067	1.4587	3.56349	0	0	3.28002	1.23234	0	0.681012	8.65588	0.994619	0.612429	0.691548	0.307159	0.83548	0.452876	0.925134	0.564777	1.92354	2.31944	1.02028	0	0	7.36108	0.753665	0.419792	2.91418	1.82334	5.16251	8.75157	2.92073	0	0.503717	0.387099	0.355988	0	0	0	0.872256	0.731691	0.659999	0.537896	3.53252	0.863357
HCA	0.297952	0.311758	0.718824	0.590165	0.307556	0.799194	0.500648	0.760861	0.689662	0.549529	0.970707	0.441842	1.46034	0.377476	1.4479	0.359295	0	0.439732	0	0.214398	0.173677	0.0760919	0.231637	0.458112	0.374045	0.300278	0.209685	1.5177	0.262984	0.351856	0.183408	0.378737	0.346189	0.611403	4.02539	1.32239	0.507391	0.291596	0.193425	0.157622	0.181746	0.112726	0.0646415	0.154593	0.152451	0.140382	0.317503	0.283518	0.153155
HDCA	0.322693	0.320901	0.575735	0.311667	0.117292	0.600699	0.451758	0.465037	2.46711	0.446559	0.524193	0.185066	1.55699	0.123514	0.269669	0.39849	0.136611	0.261156	1.17557	0.221193	0	0.0935417	0.169472	0.385522	0.169884	0.185906	0.194544	0.396088	0.189849	0.137627	0.132605	0.166881	0.139744	0.302058	1.76539	0.575492	0.359156	0.111387	0.151179	0.121043	0.0743827	0.0761557	0.0568794	0.101851	0.185385	0.103474	1.05861	0.245851	0.174717
UDCA	0.68958	0.295446	0.726326	0.701682	0.672475	0.811768	0.987569	0.730217	1.05453	0.584137	1.31937	0.65523	2.26583	0.958202	0.68049	0.574987	0.363592	0.530294	0.632169	0.348182	0.259189	0.181961	0.733379	0.38319	0.81176	0.270472	0.421926	0.762229	0.932416	0.492182	0.283988	0.872894	0.449755	1.17362	3.35899	0.98109	0.536133	0.348438	0.234129	0.152365	0.187616	0.117685	0.16218	0.414569	0.296713	0.521652	0.406981	0.53094	0.200667
LCA	0.453812	0.219707	0.441138	0.231592	0.181996	0.466174	0.518229	0.240215	0.508462	0.266833	0.674076	0.202656	1.08916	0.214817	0.293702	0.39356	0.230241	0.247767	0.275553	0.2002	0.124148	0.1462	0.237425	0.205312	0.211944	0.161045	0.2763	0.433915	0.135345	0.144976	0.161416	0.162036	0.136626	0.230692	1.58955	0.316028	0.26015	0.184501	0.132535	0.140011	0.0914738	0.0460111	0.0730087	0.0773481	0.154516	0.0940949	0.161087	0.115162	0.0846924
7-ketoLCA	0	0	0	0.462477	0.704323	0	0	0.252697	0	0	0	0	0	1.17071	0	0	0	0.256557	0	0	0	0.14936	0	0	0.640417	0.113487	0.179938	0	0.546191	0.219601	0	0.889291	0.18664	0.627545	0	0.287929	0.341406	0	0	0	0	0	0	0.164225	0.202007	0.171693	0	0	0.0585784
12-ketoLCA	0	0.156056	0.634542	0.156126	0.694691	0	0	0	0	0	0	0.27417	0	0.67059	0	0	0	0	0	0.586965	0.0908573	0.0593122	0	0	0.239739	0.19931	0.503972	0	0	0.0956787	0.465751	0.458428	0.120261	0	2.05118	0.227279	0.26301	0.410606	0	0.274889	0.190195	0.0787424	0.157219	0.0667405	0	0	0	0	0
DCA	5.02668	2.57426	3.05331	37.1595	9.41932	1.21945	4.69772	2.0258	1.30982	1.31094	3.75484	5.86037	2.6107	5.41137	1.97864	0.468877	0.662727	0.279712	1.59639	1.36655	0.738797	2.0755	0.505583	2.11705	6.84057	3.72445	5.38977	9.92499	1.57786	2.44077	2.38191	6.94323	2.19526	8.41997	2.05652	3.66679	4.81311	2.47607	0.325612	17.4774	0.803268	0.453873	1.12964	1.17155	0.737361	0.988978	0	0.385461	0.226838
23-norDCA	0	0	0	0	0	0	0	0	0	0	0	0	0	0	0	0	0	0	0	0	0	0	0	0	0	0	0	0	0	0	0	0	0	0	0	0	0	0	0	0	0	0	0	0	0	0	0	0	0
7-ketoDCA	6.88249	9.74953	13.9469	23.8616	13.8347	25.0531	2.57819	20.7266	7.56442	0.407825	12.4495	3.89343	34.0837	8.38527	45.885	9.425	2.09881	7.43424	4.21139	3.01142	0.11741	2.71287	1.20686	5.17884	17.9822	3.56659	3.75736	0.316549	33.9896	3.36386	1.70029	14.9878	49.3797	58.1318	46.6619	53.6406	0.451664	1.75373	0.241044	1.47651	0.436265	0.0112242	0.480352	4.971	3.49627	12.5402	0.176229	7.11602	5.59896
3-ketoCA	0	0	0	0	0	0	0	0	0	0	0	0	0	0	0	0	0	0	0	0	0	0	0	0	0	0	0	0	0	0	0	0	0	0	0	0	0	0	0	0	0	0	0	0	0	0	0	0	0
dehydro-LCA	0	0	0	0	0	0	0	0	0	0	0	0	0	0	0	0	0	0	0	0	0	0	0	0	0	0	0	0	0	0	0	0	0	0	0	0	0	0	0	0	0	0	0	0	0	0	0	0	0
allo-LCA	0	0	0	0	0	0	0	0	0	0	0	0	0	0	0	0	0	0	0	0	0	0	0	0	0	0	0	0	0	0	0	0	0	0	0	0	0	0	0	0	0	0	0	0	0	0	0	0	0
iso-LCA	0	0	0	0	0	0	0	0	0	0	0	0	0	0	0	0	0	0	0	0	0	0	0	0	0	0	0	0	0	0	0	0	0	0	0	0	0	0	0	0	0	0	0	0	0	0	0	0	0
6-ketoLCA	0	0	0	0	0	0	0	0	0	0	0	0	0	0	0	0	0	0	0	0	0	0	0	0	0	0	0	0	0	0	0	0	0	0	0	0	0	0	0	0	0	0	0	0	0	0	0	0	0
β-HDCA	0	0	0	0	0	0	0	0	0	0	0	0	0	0	0	0	0	0	0	0	0	0	0	0	0	0	0	0	0	0	0	0	0	0	0	0	0	0	0	0	0	0	0	0	0	0	0	0	0
β-UDCA	0	0	0	0	0.17774	0	0	0	0	0	0	0.179525	0	0.246951	0	0	0	0	0	0	0	0	0	0.149657	0.20897	0	0.195905	0	0.172537	0.322525	0	0.0711679	0.183172	0.283871	0	0	0	0	0	0.131456	0	0	0.114973	0.15147	0.114904	0.544186	0.312567	0	0.17509
7,12-diketoLCA	0	0	0	0	0	0	0	0	0	0	0	0.572352	0	0	0	0	0	0	0	0	0.612142	0	0	0	0.325156	0	0	0	0.871059	0	0.419123	0	0.835989	0	0	0	0	0	0	0.264044	0	0	0	0.321305	0	0.667271	0	0	0
6,7-diketoLCA	0	0	0	0	0	0	0	0	0	0	0	0	0	0	0	0	0	0	0	0	0	0	0	0	0	0	0	0	0	0	0	0	0	0	0	0	0	0	0	0.412105	0	0	0	0	0	0	0	0	0
12-ketoCDCA	0	0	0	0	0	0	0	0	0	0	0	0	0	0	0	0	0	0	0	0	0	0	0	0	0	0	0	0	0	0	0	0	0	0	0	0	0	0	0	0	0	0	0	0	0	0	0	0	0
ω-MCA	3.04539	2.14314	5.57802	2.27384	3.39572	2.09627	3.95885	4.42827	2.13381	0.195341	13.6237	2.59573	3.90728	1.43023	6.40138	0.619181	0.692764	2.158	1.64224	0.584549	1.98675	1.0684	0.789124	4.00466	2.92114	3.02407	0.507911	0	3.42632	1.00636	1.38719	3.95312	4.26033	8.18241	20.3574	4.48115	0.301383	0.659967	1.16905	0.259414	0.33486	0.158616	0.163775	1.68941	1.17541	3.26773	0.36645	3.45094	1.02931
muroCA	0	0	0	0	0	0	0	0	0	0	0	0	0	0	0	0	0	0	0	0	0	0	0	0	0	0	0	0	0	0	0	0	0	0	0	0	0	0	0	0	0	0	0	0	0	0	0	0	0
DHCA	0.358871	0.763686	0.795136	0.450511	0.262205	1.05642	1.08492	0.705173	0.675533	0.327423	2.40033	0.295962	0	0.167649	0	0	0	0.316283	0.969267	0.227411	0.447914	0.133403	0.171863	0.180509	0.523999	0.363353	0.463658	0.428483	0.478703	0.207396	0.750249	0.448553	0.605324	0.255051	0	0	0.25309	0.65711	0	0.320319	0.152932	0	0	0.210787	0	0.49356	0.282691	0	0
UCA	17.5197	13.2123	19.5478	81.6063	37.7473	44.5944	19.9876	51.0136	2.56611	3.21138	46.6586	59.3418	262.961	12.6373	148.666	35.5233	5.88706	25.6129	3.82761	8.79121	3.37942	17.9775	2.68245	12.2983	22.771	5.96869	3.5103	17.3127	491.481	35.3516	2.47624	50.4146	55.9383	47.7761	1.21438	73.917	3.63306	4.7838	26.1956	3.55362	3.5205	0.525581	2.97376	91.2123	18.75	287.705	21.194	201.842	22.5689
ACA	0	0	0	0	0	0	0	0	0	0	0	0	0	0	0	0	0	0	0	0	0	0	0	0	0	0	0	0	0	0	0	0	0	0	0	0	0	0	0	0	0	0	0	0	0	0	0	0	0
GCA	0.982526	5.07661	1.97359	5.07425	1.90715	2.58514	9.79331	1.30002	9.32112	3.7955	1.37833	1.57444	8.61434	1.88582	2.53166	6.64989	2.85584	7.82507	9.09752	1.26307	4.21433	0.83738	1.21812	1.90589	3.64325	2.70175	2.6362	1.34256	6.31999	3.24688	5.77568	2.97411	5.66424	2.2762	0	1.72992	1.59955	4.46486	2.5645	4.60709	2.78761	3.0007	1.63954	3.37643	1.89058	4.30266	4.32845	1.27637	1.23062
TCA	0	1.3015	0	1.05135	0.334013	0.654406	2.31508	0.429252	1.20239	1.06577	0	0	0	1.14637	0.700897	0.565076	0.655883	1.21043	3.15293	0.470184	2.45311	0.317802	0	0	0.477469	0	0	0	0.945065	0.574278	0.549656	0.350329	0.192623	0	0	0.753082	0	0.718868	0.368538	0.49804	0.828015	1.01299	0.426946	0.768073	0.277365	0.70751	1.03766	0.450036	0.308414
GCDCA	0.41596	2.38782	0	1.9408	1.72351	0.479635	2.00759	0.530454	1.30703	1.00879	0	1.42594	2.4622	1.21943	0.352626	1.63215	0.286178	3.63637	0.325766	0.747074	0.709763	0.401586	1.74881	1.12493	1.78936	1.18142	0.97293	0.295469	2.77896	0.574297	2.0236	1.25609	1.19084	1.37342	1.27674	0.485157	0.312001	1.23773	0.774093	1.25034	1.05217	0.902762	0.630721	1.38694	0.712125	1.90967	2.4872	0.494074	0.670448
TCDCA	0	0.602685	0.3205	0.334354	0.314052	0.323321	0.52773	0.216342	0.522149	0.305744	0	0.243997	1.20107	0.623429	0.246384	0.5523	0.222897	0.506792	0.381859	0.298193	0.330495	0.179349	0.206607	0.201247	0.249697	0.227529	0.193651	0.431438	0.220012	0.133118	0.201294	0.221751	0.0941922	0.221399	1.43787	0.821681	0	0.284975	0.178265	0.197479	0.293921	0.205581	0.136917	0.217009	0.178381	0.139124	0.594281	0.182304	0.155016
T-α-MCA	3.47984	4.28402	7.28969	4.168	1.45578	1.80204	17.5027	2.80033	26.0258	6.29948	16.7344	1.74354	16.2383	2.72348	3.19596	2.76107	3.27157	0.967762	17.9806	1.70747	38.7404	1.54252	4.75522	3.85961	2.55148	1.5005	1.19503	0	2.00265	0.798528	2.90219	1.49414	1.42803	0	10.5069	1.92856	2.16561	3.47315	3.96865	0.859227	3.85071	14.3535	2.46533	0	1.53373	0	2.31669	0	1.33015
T-β-MCA	0	0	0	0	0	0	0	0	0	0	0	0	0	0	0	0	0	0	0	0	0	0	0	0	0	0	0	0	0	0	0	0	0	0	0	0	0	0	0	0	0	0	0	0	0	0	0	0	0
GHCA	1.01268	3.48136	1.5601	2.20429	1.44077	0	8.5037	0.971207	10.4399	4.67034	0	2.08855	0	0.645404	2.15311	2.46735	0	6.92718	1.18326	1.22714	1.45184	0.26206	0	1.76109	1.57589	1.09732	0.856873	1.92418	1.34213	0.737458	1.94432	2.0214	2.07444	1.47439	6.68247	0.930671	1.38401	2.73316	13.1079	1.23501	1.7687	5.24821	2.52254	0.921418	0.848643	3.05552	9.95117	1.20094	1.59095
THCA	0	0	0	0	0	0	0	0	0	0	0	0	0	0	0	0	0	0	0	0	0	0	0	0	0	0	0	0	0	0	0	0	0	0	0	0	0	0	0	0	0	0.469062	0	0	0	0	0	0	0
GHDCA	0	0	0	0	0	0.470473	0	0	0	0	0	0	0	0.190661	0	0	0	0	0	0	0	0	0	0.350754	0	0	0	0	0	0	0.417886	0	0.359808	0	0	0	0.17911	0	0	0.1849	0	0.104143	0.0820265	0	0	0	0.395217	0	0
THDCA	0	0	0	0	0	0	0	0	0	0	0	0	0	0	0	0	0	0	0	0	0	0	0	0.157937	0.0575725	0	0	0	0	0	0	0	0	0	0	0	0	0	0	0	0	0.0800766	0	0	0	0	0	0	0
GUDCA	1.18796	1.45568	0.941165	0.612222	1.06401	0.830521	1.33766	1.51804	0.988926	0.196461	5.04399	2.06472	2.32118	0.703072	0.906298	0.439472	0.396132	3.39547	1.6086	0.487131	0.219594	0.130871	3.15692	0.838558	2.50735	0.441737	1.93702	0.795553	1.31718	0.247132	1.57098	2.03032	3.78084	1.24803	2.24371	0.567341	0.916064	0.677304	3.59748	1.13371	0.450634	0.389747	1.1572	0.700664	0.439034	1.36963	10.097	0.982288	1.02874
TUDCA	0	0	0	0	0	0	0	0	0.409676	0.258118	0.485073	0.1572	0	0	0	0	0.17736	0.127062	0	0	0.149053	0.105534	0	0	0.0497264	0	0.115677	0	0.169273	0	0	0	0	0	1.24899	1.28071	0	0	0.166634	0	0	0.0427078	0	0	0.0556143	0.086999	0.482233	0	0
GLCA	0	0	0	0	0	0	0	0	0	0	0	0	0	0.1119	0	0	0	0	0	0	0	0	0	0	0	0	0	0	0	0	0	0	0	0	0	0	0	0	0	0	0	0	0	0	0	0	0	0	0
TLCA	0	0	0	0	0	0	0	0	0	0	0	0	0	0	0	0	0	0	0	0	0	0	0	0	0	0	0	0	0	0	0	0	0	0	0	0	0	0	0	0	0	0	0	0	0	0	0	0	0
GDCA	1.50554	1.21861	0	1.1624	1.69074	0	6.45321	0	1.86339	1.07695	2.76841	1.31351	5.8051	0.647795	0.847748	1.00542	1.15732	0	5.43847	0	1.14373	0.412671	0	0.947575	2.42539	1.75365	1.77631	0	0.715935	0.578618	5.03817	1.13503	2.59289	1.27482	0	0	1.11397	1.57345	0.532633	0.638295	0.956669	1.13037	0.879739	0	0.326467	0.246617	0.828203	0.658848	0
TDCA	0	0	0	0	0	0	0	0	0	0	0	0	0	0	0	0	0	0	0	0	0	0	0	0	0	0	0	0	0	0	0	0	0	0	0	0	0	0	0	0	0	0	0	0	0	0	0	0	0
T-ω-MCA	0	0	0	0	0	0	0	0	0	0	0	0	0	0	0	0	0	0	0	0	0	0	0	0	0	0	0	0	0	0	0	0	0	0	0	0	0	0	0	0	0	0	0	0	0	0	0	0	0
GDHCA	0	0	0	0	0	0	0	0	0	0	0	0	0	0	0	0	0	0	0	0	0	0	0	0	0	0	0	0	0	0	0	0	0	0	0	0	0	0	0	0	0	0	0	0	0	0	0	0	0
TDHCA	0	0	0	0	0	0	0	0	0	0	0	0	0	0	0	0	0	0	0	0	0	0	0	0	0	0	0	0	0	0	0	0	0	0	0	0	0	0	0	0	0	0	0	0	0	0	0	0	0
Fig 3f
	humans
CA-3S	0.0387424	0.0585877	0.0464963	0.2353	0.0678481	0.0267598	0.195281	0.102689	0.0898455	0	0	0	0	0.109355	0.27821	0	0	0	0	0	0	0.0458146	0	0	0.0713227	0	0	0	0.426232	0	0.070793	0.151355	0.0714446	0.159618	0	0.196444	0	0	0	0	0	0	0	0	0.0552467	0	0	0	0
CDCA-3S	4.14435	2.45454	2.52619	10.9356	9.83671	2.65607	7.29059	7.31095	1.48948	0.462582	7.29013	6.02436	0.942011	4.47559	17.5552	0.645982	0.336841	3.10731	0.360225	0.913101	1.19452	1.13869	0.341318	2.97056	6.00539	2.22119	1.26916	0.694849	40.3414	2.24799	1.78021	11.3787	7.6123	14.6744	0	7.83884	0.495721	0.768568	0.424191	0.672823	0.559121	0.276959	0.145263	1.65772	3.79827	0.470238	0.82834	2.96723	0.395844
UDCA-3S	3.10729	1.28454	1.21253	7.37554	5.08361	2.0396	2.88402	5.94229	1.04614	0.407114	6.07969	5.2239	2.7597	3.63004	12.1277	0.428346	0.489816	1.5757	1.55865	0.988827	0.896287	1.23899	2.61584	0.892231	6.84054	0.918195	1.35322	1.20436	24.1972	2.55742	1.47292	7.14782	9.00142	10.1276	2.71236	8.68277	0.814796	1.09531	0.346131	1.06331	0.36498	0.660842	0.356734	2.33897	4.95299	3.76984	4.21253	5.87656	0.599423
LCA-3S	5.1248	2.27443	2.16793	2.00219	6.56451	6.64366	2.34318	3.04945	1.89662	0.197901	30.0349	1.25998	0	2.8387	1.59228	0	0.250433	0	1.89412	0.115252	0.150327	0.175659	0.79008	0.811286	6.29514	4.25654	1.18891	1.17211	0	0.561792	5.01611	3.94768	23.2736	6.32699	2.70326	5.05859	2.32016	1.31098	0	0.54407	0.207005	0.470994	0.362627	0	0.277279	0	0	0	0
DCA-3S	7.74315	3.58496	3.91771	4.4049	5.25553	4.04814	10.7107	3.833	1.21853	0.211299	17.8417	3.79687	11.515	2.82647	10.969	0.190848	0.88595	0.170738	2.79255	1.2612	2.00499	1.21825	1.44334	2.54469	6.24425	5.51769	1.12033	0.654691	1.42013	1.63256	3.54751	5.36229	9.03879	9.827	0	7.10523	1.20893	1.38604	0.109094	0.519088	0.309376	0.286485	0.267407	0.110943	0.988967	0	1.64282	0	0.114978
GCA-3S	1.08032	2.60774	0.576724	3.86119	0.826546	1.47174	12.3784	1.04707	2.90721	2.14948	1.05611	1.25365	4.85128	1.14249	3.43033	1.46961	1.82728	4.03258	2.43137	0.901507	9.33785	0.520248	2.03423	1.2461	3.09995	2.68107	1.049	0.784182	7.16736	2.86526	2.20081	3.24538	4.86138	2.05165	0	2.16338	1.34635	3.03759	2.04414	2.61987	2.36319	3.25397	1.09755	2.11744	2.85128	3.61023	3.80711	1.2904	0.619781
TCA-3S	0	0.292997	0	0.524985	0	0	1.20478	0	0	0.328046	0	0.136465	0	0.22483	0.646851	0	0.250433	0.4152	0.422817	0.122179	1.7339	0.0815156	0.207598	0	0.15889	0.130198	0	0	0.322185	0.192735	0.109153	0.142803	0.128724	0	0	0	0	0.275395	0.266604	0.147386	0.346489	0.424756	0.119693	0.296552	0.267578	0.249358	0.359204	0.0931353	0.113046
GCDCA-3S	62.0263	107.562	35.6518	191.753	87.1333	37.1894	280.466	48.972	140.574	90.6279	74.6303	102.964	143.121	51.5516	73.4783	49.8423	33.4671	179.694	67.2424	41.2946	166.91	26.6298	76.9734	84.7385	103.497	80.4807	68.1346	67.9246	329.128	85.2592	100.721	108.664	123.228	62.0684	114.12	52.7385	90.7406	92.6918	175.673	113.217	73.7464	191.638	63.4791	64.6962	100.614	186.33	246.609	53.8738	34.9806
TCDCA-3S	1.80958	4.62563	1.53097	7.44212	1.83603	1.64944	12.8227	2.87386	6.27855	6.01188	4.18994	2.13479	4.27026	5.97341	5.2504	1.02371	1.51339	6.51841	4.80159	2.08664	12.5662	0.990484	3.89322	1.90228	1.94934	1.75851	1.41179	2.38621	5.22591	2.28228	1.59927	3.11355	1.671	1.26737	7.03045	2.22077	2.44358	3.21536	8.07524	2.24236	3.94266	9.46879	2.46754	2.0092	5.40772	3.67459	9.10341	1.55867	1.84609
GUDCA-3S	12.4685	14.3574	3.9321	52.6941	19.7231	7.82786	35.3157	14.3871	5.7032	4.88487	15.5154	29.3636	47.7057	12.732	31.0931	3.22701	7.55816	18.8441	7.11909	9.49614	28.8144	6.6339	3.86123	9.13069	45.0199	7.79286	15.2493	10.0181	65.833	29.9811	18.1168	29.3844	47.1297	35.0002	10.1006	16.9509	7.9183	6.40351	11.6476	21.2005	5.06069	8.57609	5.26993	23.2528	32.3397	128.433	143.654	40.6602	9.09195
TUDCA-3S	0.484111	0.562124	0	1.90029	0.327503	0.326814	1.79682	0.589084	0.390434	0.722337	0.878568	0.410961	1.8975	1.08326	2.01809	0	0.457195	0.84006	0.665638	0.422634	2.09717	0.213671	0.176677	0.371405	0.859791	0.178354	0.295838	0.404222	1.36283	0.834308	0.255323	0.608899	0.568488	0.442506	0	0.471535	0.277078	0.264938	0.582059	0.396818	0.390438	0.361537	0.271119	0.898252	1.3012	2.97811	6.00749	1.53531	0.517519
GLCA-3S	155.632	138.249	62.7091	63.2735	262.963	97.0587	336.419	47.5224	199.048	53.6725	289.781	52.8733	4.17204	104.274	26.9296	12.9674	36.6533	8.97667	221.94	10.0436	33.1462	14.578	116.529	43.2693	326.638	117.014	148.186	62.4437	1.3599	38.9732	424.881	95.2716	302.854	85.7311	347.162	79.6047	266.159	241.682	20.5898	121.921	69.3964	158.307	87.6017	3.24048	41.2298	8.67086	1.12843	0.542556	5.41047
TLCA-3S	16.9512	29.9109	8.53309	12.2485	22.5132	15.6279	92.5485	8.11611	35.9254	24.403	53.9268	4.64192	3.35927	29.1736	11.4654	1.45871	8.40151	2.04139	52.6066	2.91474	12.7022	3.91871	20.0242	5.475	30.5146	12.5045	7.60354	8.88106	0.464743	5.47194	36.305	9.6225	11.0611	7.25116	65.2592	10.2948	48.8835	37.132	7.39785	15.1919	18.5357	51.16	16.418	0.614842	5.25091	1.37961	0.730101	0.360164	2.60541
GDCA-3S	292.54	402.442	140.629	182.203	151.617	167.259	1594.93	59.1421	245.909	171.49	394.029	162.406	0.968688	71.3525	119.321	32.686	153.07	26.3105	537.84	75.467	498.142	50.4358	375.914	163.79	345.839	391.773	170.885	124.293	111.141	139.036	484.762	111.423	364.304	127.653	273.416	132.385	280.562	311.293	80.0145	184.265	99.0549	288.32	185.729	13.9346	90.1765	42.3767	128.569	0	27.2617
TDCA-3S	7.16746	15.3669	4.12874	6.51194	2.48257	4.80803	53.1989	2.8274	9.05865	11.4249	16.2169	3.43773	0.58816	5.97303	8.59125	0.823277	6.15143	0.864876	33.0313	2.99215	37.1632	2.52751	13.2086	3.08626	6.08899	6.8378	2.49739	3.28171	0	3.35294	6.3438	2.78359	3.26793	2.02924	13.0399	3.49664	7.6341	9.26607	3.18552	3.15228	4.29546	13.1103	5.96891	0.569468	3.87694	1.04299	0	0	1.45698
Fig 3g
	humans
TBAs	0.769982	0.679878	0.619314	0.925338	1.69861	0.698884	0.466299	0.740472	1.43791	0.995056	0.87852	0.802758	0.710632	1.60644	0.48992	0.794192	0.526684	2.42301	0.633619	0.737597	0.540323	0.699228	0.596454	0.829074	1.13457	0.541147	1.12663	0.996913	0.66354	0.864825	1.14422	0.96763	1.05263	0.753208	1.82641	0.598968	1.40692	1.1299	2.09249	1.26454	1.50353	1.42138	0.915615	0.793907	1.55196	0.980406	2.71017	0.531818	0.90411
PBAs	4.03623	6.25282	0.989643	3.44336	3.20694	3.2265	6.82636	0.8488	4.23992	12.2693	0.835067	3.37927	7.51627	1.84663	1.12144	2.45233	2.95163	4.96137	4.43404	4.61326	9.33589	2.95414	19.5076	9.1467	1.56866	4.58826	2.06332	11.4127	3.76116	5.76776	5.31191	1.20704	4.49318	1.13871		1.01868	21.5187	5.80215	21.9525	9.07486	7.41157	24.9389	17.3391	3.20568	9.22866	18.8055	25.0342	4.44207	3.03273
SBAs	0.606589	0.44633	0.538788	0.463797	1.48025	0.565293	0.299552	0.685544	1.07057	0.517726	0.887552	0.442765	0.278569	1.52765	0.32767	0.341053	0.353457	0.795601	0.527356	0.328537	0.225128	0.408372	0.39242	0.393171	1.0566	0.360597	0.954101	0.577824	0.175059	0.451156	0.97968	0.838161	0.842225	0.644961	1.45819	0.502083	1.11377	0.892572	0.578274	0.785854	0.924254	0.792915	0.594846	0.321851	0.772771	0.451811	1.19396	0.283482	0.437467
[truncated: 29 more columns]

## Sheet: Fig 4
Fig 4a
	humans	rats	mice
CA group/TBA	5.31414	0.22426	4.57
CDCA group/TBA	7.35631	0.213654	0.68166
MCA group/TBA	0.161463	5.16156	25.8454
UDCA group/TBA	3.29878	0.0144142	1.53028
HCA group/TBA	0.134963	0.527706	0.770464
HDCA group/TBA	0.328769	16.0947	1.19375
LCA group/TBA	26.7855	6.86944	2.25952
DCA group/TBA	37.7496	9.90212	12.3386
others	20.0908	61.2878	54.2353
Fig 4b
bar chart				pie chart
fecal TBAs	sulfated TBAs	sulfated TBAs		unconj-PBAs%	unconj-SBAs%	conj-PBAs%	conj-SBAs%	unconj-PBA-3S%	unconj-SBA-3S%	conj-PBA-3S%	conj-SBA-3S%
10867.1	10857.2	9.9483		10.9568	83.2305	0.573266	0.349267	0.701739	3.64608	0.0188447	0.103725
17913.3	17741.9	171.314
16237.5	16191.8	45.7747
11568.8	11513.8	54.9889
5946.75	5902.23	44.5129
20100.2	17709.6	2390.52
9864.63	6871.83	2992.8
4619.12	4575.16	43.9583
5776.56	5774.8	1.76227
10351.4	10333.5	17.9136
19326.1	18678.2	647.876
15981.3	14999.5	981.78
11752.8	10979.1	773.637
7707.3	7303.47	403.827
23116	21109	2007.01
14219.5	13989.5	230.029
5763.99	4740.62	1023.37
13752.4	13560.2	192.183
25976	25135.4	840.652
6591.68	6340.33	251.345
14108	13237.2	870.833
26731.5	24829.4	1902.1
36273.2	35644.7	628.418
78914	78377.8	536.208
10274.7	9931.7	343.007
9013.24	8929.78	83.4688
7729.16	7626.61	102.552
5350.58	5077.78	272.802
22806.3	22751	55.3901
34163.1	33431.9	731.222
8323.34	8117.74	205.6
50564.8	49935.3	629.526
10022.8	8356.09	1666.73
17504.1	16468.3	1035.87
15144.9	15065.1	79.8793
16158.4	16024.9	133.436
14847.3	14388.2	459.076
31307.6	30979.3	328.312
11436.4	10758.7	677.748
21288.7	20090.6	1198.11
26543.9	26079.5	464.44
21784.3	20944.6	839.681
23976	23834.4	141.618
18218.3	17843.7	374.573
13169	12707.6	461.405
21007.5	19922.3	1085.17
18514.3	16878.5	1635.79
14772.4	14096.7	675.712
13220.4	12046.7	1173.65
Fig 4c
bar chart				pie chart
fecal TBAs	sulfated TBAs	sulfated TBAs		unconj-PBAs%	unconj-SBAs%	conj-PBAs%	conj-SBAs%	unconj-PBA-3S%	unconj-SBA-3S%	conj-PBA-3S%	conj-SBA-3S%
5129.82	5116.99	12.8295		5.62388	93.9598	0.239752	0.0179335	0.0696611	0.0335963	0.00289635	0
3474.12	3463.25	10.8765
4137	4134.4	2.59357
7323.45	7322.01	1.44196
5752.09	5747.12	4.96026
5576.35	5569.72	6.63207
5233.25	5226.61	6.63946
1772.7	1772.42	0.272371
1690.86	1689.52	1.34494
1922.4	1921.78	0.624513
3107.72	3107.22	0.495021
2433.35	2433.13	0.218839
1418.7	1418.7	0
2055.87	2055.12	0.748802
Fig 4d
bar chart				pie chart
fecal TBAs	sulfated TBAs	sulfated TBAs		unconj-PBAs%	unconj-SBAs%	conj-PBAs%	conj-SBAs%	unconj-PBA-3S%	unconj-SBA-3S%	conj-PBA-3S%	conj-SBA-3S%
1899.34	1888.99	10.3503		27.6462	71.2719	1.13035	0.57807	0.0364976	0.454146	0.0545472	0
1535.01	1529.96	5.04821
4635.73	4627.08	8.64542
1085.66	1082.13	3.52723
2236.77	2225.98	10.7882
1879.37	1853.26	26.1037
2236.77	2225.98	10.7882
1269.3	1256.15	13.1454
1973.21	1949.43	23.7798
819.942	815.625	4.3174
1187.99	1176.54	11.4503
1350.36	1344.51	5.84556
1545.14	1531.48	13.663
1348.84	1336.85	11.9896
Fig 4e
	humans
CA	272.166	3788.84	0	2149.79	0	813.632	0	0	0	0	9.35326	6.50572	391.751	8.03261	179.152	6.47654	13.9801	66.1665	226.628	16.7463	2360.83	1347.52	14280.1	38808.3	0	0	43.2344	0	0	12729.7	16.0326	15466	262.342	0	0	0	42.94	717.999	69.2831	0	0	219.429	36.9479	201.941	45.4054	25.3282	139.528	8.44501	36.8948
CDCA	1418.5	2553.11	54.2584	1014.4	242.893	1212.26	22.8296	7.461	2.07712	41.8289	43.8796	37.4637	482.531	34.1275	590.243	32.9583	397.309	1265.8	935.585	48.5501	2352.13	2600.42	3635.86	9112.97	242.893	4.71136	89.8952	6.43936	11.0753	4211.69	78.9458	14482.6	201.227	3688.31	6973.24	1559.04	48.0982	1878.51	117.882	1322.67	8415.46	471.687	88.9006	284.559	685.335	71.4596	155.405	30.9806	82.2881
α-MCA	0.937006	0	2.40629	0	2.96113	0	3.78338	1.50934	9.85197	5.63746	7.30887	5.16949	10.4275	5.9789	0	8.86837	0	7.39722	12.3635	3.74972	11.3295	17.4886	0	0	0	0.747955	2.34911	1.88092	10.3298	0	3.11087	0	3.06719	0	0	2.47635	12.842	12.9351	6.5895	8.78144	0	8.27676	5.80934	0	11.9775	11.6233	4.3752	4.9658	5.05343
β-MCA	0	0	0.0377	0	0	0	0.329909	0	0	0	5.43746	6.82845	11.226	2.95213	10.2792	11.8162	2.4619	8.90188	7.5891	6.14668	26.0342	27.7946	127.324	364.587	0	0	0	0	1.1167	0	0	0	0	0	0	0	0	19.3806	3.45146	9.90937	317.545	6.81323	9.4577	9.73495	8.80542	4.89485	4.17242	8.05523	6.4898
HCA	2.69265	18.7634	0	63.0043	10.7091	16.7974	0	0	0	0	2.34348	11.6865	20.1037	7.00072	10.3485	3.96473	5.90874	17.3785	30.6158	6.0045	64.7284	33.6063	110.992	134.911	0	0	5.73671	0	6.49465	27.5105	6.66077	131.186	8.65223	56.3467	65.619	27.4187	9.55149	39.4932	6.77442	27.9424	89.3232	23.9796	3.60472	14.9878	8.28207	5.93056	8.53651	2.64899	6.18545
HDCA	10.1701	10.023	38.6555	0	6.39007	28.6292	34.4749	18.0098	21.2559	28.7855	57.1324	22.7358	54.1333	40.0225	68.5511	66.3618	33.8968	63.8595	13.8173	56.3769	51.5482	158.843	11.3706	0	0	27.0973	45.0618	27.7741	55.9811	40.1664	8.81407	0	0	0	0	56.248	60.3398	85.3251	28.6943	0	29.0187	0	49.1736	65.117	68.4821	28.3598	93.5425	73.3603	54.6578
UDCA	132.981	355.529	119.903	1064.43	0	479.965	0	0	0	0	19.0039	25.1581	408.241	50.7724	454.429	44.9271	89.8244	538.469	198.656	14.4823	210.362	1094.27	1514.84	2989.55	0	0	95.1901	0	0	2840.55	157.738	5747.56	613.112	4047.07	752.95	611.383	49.24	394.127	51.3318	1380.87	3467.28	1019.27	362.394	369.259	372.459	49.3589	94.8489	35.0352	42.6802
LCA	3107.7	2236.16	4186.28	897.182	1926.52	4654	2305.1	1419.17	2351.03	4599.36	7476.66	5482.32	2670.92	2849.48	7913.34	4406.98	1106.77	4540.1	10149.2	2060.09	1773.02	5573.84	1956.55	42.4174	3345.53	3328.54	2857.53	2371.75	6124.79	790.34	3345.53	87.2256	110.274	140.726	425.655	4002.54	5418.69	7409.71	3545.62	5521.94	41.3048	5429.77	6428.7	6556.25	3763.43	7190.76	6333.91	5478.58	3668.27
7-ketoLCA	19.1203	91.5652	8.9146	252.56	0	106.018	0	0	0	12.69	8.57233	11.3805	115.525	16.8651	198.966	9.87194	38.04	134.884	152.058	8.33058	109.261	250.153	270.884	36.8347	0	0	5.36608	0	0	428.293	10.2288	667.889	116.666	234.178	687.551	89.8363	18.2904	204.486	29.9571	331.301	687.304	359.12	18.3614	89.1296	91.6544	21.8729	21.7919	12.2428	15.1354
12-ketoLCA	651.5	199.634	1283.3	405.295	811.052	816.169	842.709	189.748	183.301	1204.75	2042.98	1373.58	698.524	791.125	1832.17	915.041	368.618	498.992	2432.59	290.572	378.175	1474.25	956.611	20.2613	813.611	722.72	251.649	286.485	2084.23	142.77	100.393	38.8196	0	0	169.435	262.848	1584.87	880.879	994.68	1878.3	0	2122.77	5188.92	708.742	1225.87	1541.51	1009.73	1549.59	993.902
DCA	4258.19	7461.1	8547.04	2899.22	1618.59	7949.18	3298.45	2441.67	2276.27	2382.79	7371.1	6229.63	5134.96	2712.56	7692.61	7279.21	2098.33	5048.01	9586.23	3329.19	4705.56	10472.1	7842.83	302.677	5043.18	4038.04	3660.03	1514.02	10578.3	2647.21	3631.13	1480.23	5194.49	20.5355	3243.38	6125.33	3492.11	17257.8	5090.51	7862.26	71.2746	9178.58	7709.43	8335.47	5043.18	7512.17	7326.53	5175.3	6190.46
23-norDCA	0	0	0	0	0	0	0	0	1.78682	0	4.32749	3.93039	5.94839	0	5.83047	5.44521	1.6794	6.19371	4.34109	1.64996	8.22039	13.891	7.22988	27.3796	0	0	0	0	0	0	0	0	0	0	0	0	2.83684	7.40354	1.3141	2.78566	7.5451	2.81001	0	4.38366	2.90567	3.3451	3.86869	5.83046	4.45854
7-ketoDCA	1.80311	252.63	6.75693	847.067	2.3024	99.7313	2.09728	5.54315	15.231	14.074	3.13791	5.60503	81.4529	8.5683	46.4114	5.07941	2.65542	22.6057	35.318	3.93851	69.4161	104.631	472.916	5157.5	15.231	0.814091	10.5653	3.97952	6.17661	1649.91	2.74243	2449.67	194.163	600.735	996.687	94.5663	10.4028	99.3798	15.3465	87.7554	1545.03	85.2461	5.55264	31.0627	21.7918	7.2244	12.8737	2.87183	8.14842
3-ketoCA	8.93644	38.3086	5.16322	155.267	3.70565	24.4008	0	0	2.94848	8.07935	2.60149	4.28294	38.9826	1.66908	37.5252	3.28906	10.1734	11.8323	25.9462	1.44612	147.167	147.524	813.58	1827.44	0	0	0	0	5.85367	270.928	0	402.104	13.1321	139.684	214.75	29.2803	4.07972	74.9883	7.73606	88.44	2540.29	23.8411	0	14.6978	12.5598	3.47424	7.50761	3.40338	6.70672
dehydroLCA	102.704	16.0976	188.09	41.0287	436.345	127.112	81.3828	58.5629	84.3617	915.935	721.87	890.898	185.534	414.07	664.878	271.149	79.3466	409.827	822.103	109.806	42.5152	186.814	115.49	6.93879	0	0	41.8284	163.687	998.016	19.9187	52.7614	8.83437	110.518	55.8739	14.7113	56.9956	2762.58	118.203	236.868	504.891	6.25145	429.837	2691.83	259.707	438.896	1706.83	303.678	899.581	366.531
allo-LCA	4.52429	1.42064	33.7129	1.08338	180.525	0.732895	3.86284	21.4975	152.688	120.71	0	0	0	0	0	0	0	0	0	0	0	0	0	0	0	9.76818	5.52658	68.2277	174.752	0.747541	1.0855	4.19357	0.687723	0.268664	0.338702	3.22482	0	0	0	0	0	0	0	0	0	0	0	0	0
iso-LCA	274.312	84.6912	1568.69	132.661	564.377	422.159	226.506	310.837	628.444	913.167	745.015	689.114	144.824	291.064	928.404	783.295	93.0317	491.336	188.905	238.85	123.821	536.148	85.8745	4.20059	394.292	714.624	394.292	591.924	2506.82	70.5223	517.183	14.7097	2.84955	13.0562	43.0925	558.806	708.59	610.282	341.159	355.734	5.31788	381.499	1049.39	530.962	415.852	1495.5	547.107	659.236	357.609
6-ketoLCA	0	0	0	9.44413	2.3488	6.11921	0	0	0	6.17699	13.1988	30.0503	18.2672	7.012	24.1219	9.34	9.44413	26.2837	65.464	8.27406	9.40423	27.3274	42.3293	39.3892	0	0	3.43848	1.58715	6.27416	0	9.56503	0	0	0	0	3.98618	13.7278	9.44009	8.42723	43.1685	56.7907	59.4877	21.9554	16.7228	18.262	27.4735	13.4305	11.5395	12.2778
β-HDCA	0	0	4.30425	0	0	0	1.19456	0.797925	2.09606	0	46.6972	35.5673	0	20.4395	44.6549	47.9599	15.8999	32.6239	16.2432	21.9578	17.4365	60.7879	17.4134	2.97329	0	1.10659	2.38329	1.95402	4.62428	0	0	0	0	0	0	0	39.7413	32.5064	37.2814	27.7272	2.28462	45.1949	113.419	27.249	35.4549	41.7825	38.071	45.4669	32.8101
β-UDCA	16.2845	25.6424	48.8799	189.185	3.27243	66.8476	1.04955	0.245021	0.677727	19.6291	6.33588	5.59075	55.5475	14.1203	105.769	7.35375	16.2238	164.447	11.4289	5.05154	15.5566	95.2138	223.16	525.195	19.6291	1.55409	23.5089	0.608635	8.7559	470.429	45.2716	977.158	133.066	569.248	152.689	127.466	8.63018	30.677	17.0912	217.138	366.679	302.135	9.20031	63.9602	15.3906	18.5797	11.5626	5.55238	5.27374
7,12-diketoLCA	1.78053	1.78053	1.78053	24.9075	0	5.19605	0	0	0	9.60354	0	2.21235	1.69511	1.25783	1.81183	1.03435	1.44638	2.23352	1.19943	1.55935	1.48868	1.37292	1.3587	1.83861	0	0	0	0	0	23.9108	0	12.4182	4.95804	12.0872	18.001	0	0	1.38957	0	2.27431	1.02907	1.40817	2.39222	0	1.29143	1.66648	2.13622	1.18113	1.99153
6,7-diketoLCA	0	0	0	0	0	0	0	0	0	0	0	0	0	0	0	0	0	0	0	0	0	0	0	0	0	0	0	0	0	0	0	0	0	0	0	0	0	0	0	0	0	0	0	0	0	0	0	0	0
12-ketoCDCA	0	0	9.73309	102.244	22.9144	0	14.9619	0	0	18.0419	0	0	0	0	0	0	0	2.15545	0	0	1.94071	0	26.0943	75.2507	0	0	10.8296	14.2908	108.61	0	2.09424	50.2099	8.51272	41.2854	0	0	0	1.63145	0	1.06282	66.5534	3.61081	6.19071	3.86871	0	2.64703	0	0	0
ω-MCA	2.53927	111.705	12.1854	140.821	3.4714	65.9958	4.23082	31.0846	6.99076	1.55516	13.5998	0	17.63	0	9.79838	0.491745	0.273657	47.2217	0.939547	0	65.6261	76.1722	1230.37	3483.51	0	0	29.2413	1.03072	15.0143	812.98	22.2631	1101.45	20.9442	370.65	372.439	68.4241	1.45946	11.1304	2.66324	20.4944	2269.38	52.957	0	5.68399	2.42264	4.95267	2.46925	0	1.31266
isoDCA	3.20904	0	0	0	0	0	0	0	0	0	2.53315	1.36437	0	0.996074	0	0	0	0	0	1.25687	0	0	0	0	0	0	0	0	0	0	2.43476	0	2.47388	0	0	0	0.973797	0	0	0	0	0	0	0	0	0	0	1.27367	0
apoCA	0	0	0	0	0	0	0	0	0	0	0	0	0	0	0	0	0	0	0	0	0	0	0	0	0	0	0	0	0	0	0	0	0	0	0	0	0	0	0	0	0	0	0	0	0	0	0	0	0
muroCA	0	0	1.42348	0	0	1.22079	0.991843	0.709129	0.532879	0.693805	0	87.3516	34.5998	0	71.289	46.0664	35.326	43.7868	103.129	30.2291	23.6858	224.931	49.376	0	0	0	2.01089	1.34398	2.96236	0	1.82495	0	0	0	0	0	35.8823	78.6921	20.6866	41.0931	0	66.1958	0	41.7589	51.771	74.4974	54.4266	65.4738	38.797
DHCA	0	0	0	0	0	0	0	0	0	1.49086	0	5.36088	1.4565	1.27712	1.49815	1.3608	2.66916	6.03351	5.44854	1.15266	3.51052	1.77082	1.42323	6.1966	0	0	0	0	0	0	0	0	0	0	0	0	2.11058	4.4791	1.5016	4.31111	2.55035	2.67382	0	1.14536	0	4.62854	1.0256	0	3.93833
UCA	0	427.553	10.3494	1039.59	0	188.942	0	0	0	0	7.14294	5.19784	56.968	5.83468	81.2748	7.52217	8.97117	74.1092	30.3939	3.12511	61.0402	165.222	585.303	14808.4	0	0	15.3005	0	0	5635.73	28.5823	6569.35	1299.29	6249.09	798.854	392.196	8.83439	100.434	6.41805	194.66	5654.84	364.162	9.3431	48.6799	16.1155	15.4569	11.7868	4.17976	13.791
ACA	0	0	31.5113	0	0	51.2595	0	0	0	0	0	0	18.191	1.91102	6.37167	1.27196	0	15.5153	22.4389	0	0	29.3738	229.305	258.241	0	0	4.12253	0	0	0	14.8695	0	0	0	0	47.3185	0	26.8477	3.26851	24.5804	159.969	30.4869	2.83374	11.223	0	2.32924	3.29727	0	2.15381
GCA	28.0195	18.7742	4.0268	14.112	17.8796	63.4134	4.92024	15.6218	7.8297	8.83038	8.71634	4.52106	74.7517	3.76815	18.689	2.59497	69.9486	1.4195	8.08576	13.9466	53.1868	20.3792	357.235	101.68	14.112	25.1764	3.3476	4.57048	8.58196	103.21	11.9874	46.1719	11.8844	13.686	16.644	262.393	8.44657	403.77	30.2287	36.0386	52.3622	91.8177	13.686	40.9208	5.68436	7.24496	202.38	1.52859	8.11213
TCA	14.2588	7.16495	2.33641	26.0404	4.51113	50.2145	1.24411	20.1884	1.4647	0.0504	2.41277	3.5243	10.6438	1.4395	4.69322	2.61719	4.60217	1.82359	1.70974	7.46879	254.182	4.30336	146.207	93.8744	4.60217	6.88523	4.60217	1.82209	4.60217	375.005	2.83326	148.095	7.87612	165.974	40.4459	158.677	2.74342	24.4433	5.48625	3.90034	27.781	16.797	0.428647	2.35429	3.22662	4.45933	62.7025	0.513477	1.33493
GCDCA	266.921	20.3475	9.65231	19.6244	19.3291	123.227	12.2227	15.0371	12.737	10.6941	23.8802	4.27147	122.8	3.00499	67.3335	1.61668	108.859	3.77479	22.7131	24.2407	30.5972	32.2618	296.645	92.394	22.7131	25.8605	8.22532	6.96787	16.204	45.8925	19.2115	23.2213	22.6346	14.1346	16.0082	714.364	21.2498	245.744	39.9739	40.6712	98.7994	74.9757	0.546589	64.4346	155.609	15.5878	204.027	3.71268	35.8497
TCDCA	76.7308	7.14366	2.22126	8.15444	6.49623	139.954	4.88218	8.9666	4.07258	3.88555	2.29629	1.60459	9.36279	1.19799	4.81643	0.52015	20.5855	2.34597	2.42252	6.37171	60.5186	9.35782	41.3834	25.9155	7.96638	8.8075	6.80481	2.81526	3.98641	52.0279	8.029	11.8639	6.56696	14.8246	41.8387	375.964	0.5111	14.6919	6.38158	9.19001	17.8082	9.37094	0.0746	7.96638	12.6338	4.63112	53.986	0.907943	8.54861
T-α-MCA	0	0	0	0	0	0	0	0	0	0	0	0	0	0	0	0	0	0	0	0	18.1823	0	5.05481	3.30559	0	0	0	0	0	0	0	0	0	0	0	0	0	0	2.60271	0	4.28992	0	0	0	0	0	0	0	0
T-β-MCA	0	0	0.701294	0	0.705479	0	0	0.71556	0	0	1.332	1.38457	1.38491	0.830117	0.979776	1.33695	0.530001	0.859904	0.78259	1.09135	0	0.984069	0	2.17108	0	0	0	0	0	0	0	0	0	0	0	0	2.21698	2.67478	0	0	2.81758	0	0	0	0	0	0	0	0
GHCA	0.777684	0.925161	0	0	1.17517	0	0	1.02946	0	0	0	0	0	0.476165	0	0	0	0	0	0	0	0	0.78422	0	0	0.514091	0	0.285743	0	0	0.989339	0	0.458929	0.684025	0	0.908197	0	0	0	0	0	0	0	0	0	0	0	0	0
GHDCA	0.780791	0	0	1.48596	0	0	0	0.767012	2.24288	0	0	0	0	0	0	0	0.00422	0	0.045	0	0	0	0.0166	0.101653	0	0.447273	0	0	0	0	3.59168	0	0	0	0.677885	4.0363	0	0	0	0	0	0	0	0	0	0	0	0	0
THCA	0	0	0	0	0	0	0	0	0	0	0.208653	0.60082	0.445171	0.909045	0.32195	0	0.546491	0.128699	0.382648	0.379662	4.59868	0.335131	0.802835	0.595232	0	0.606364	0	0	0	0	0	1.77812	0.541993	0.668971	1.01202	1.61756	0.0946	0.538614	0.461074	0.346497	0.643147	0.815488	0.432235	0.360277	0.740564	1.15446	1.33807	0.250319	0.205267
THDCA	0	1.80538	0.443261	3.0447	1.08219	1.71	0	0	0	1.89174	0	0	0	0.310076	0.317689	0	0	0	0	0.249799	0.468441	0	0	0	0	1.43545	0	0	0	0	1.71642	0	0	2.50829	0	3.19251	0	0.242673	0	0	0.698915	0.817594	0.454176	0	0.668193	0	0	0	0
GUDCA	2.61921	1.45656	0	2.19198	1.77671	8.63289	0.730211	1.13112	0.571818	0.363717	1.56261	0.499201	34.6129	0.800055	7.34339	0	11.9345	1.4537	1.28757	0.229652	1.0557	13.1407	86.2964	16.6879	1.98434	2.41409	0	0.451606	1.33452	4.94787	0.741791	7.24631	3.24933	1.57558	0.995192	19.3419	6.27778	30.0958	5.60483	11.6082	56.5679	28.2154	1.98434	16.8187	151.161	4.75462	29.1402	0.709751	1.03106
TUDCA	1.13416	6.18237	0.802773	9.01146	1.75531	7.12079	0.394864	1.13416	1.98561	1.13416	0.760398	0.731579	1.09889	0.463355	0.543838	0.679608	1.81005	0.791219	0.272599	0.600496	1.16942	1.54027	3.51553	1.33766	1.13416	0.149318	0.670127	1.32189	0.283519	10.1289	3.00043	3.7054	0.797098	14.6089	6.69567	13.9393	0.268413	0.659215	0.186294	3.01424	12.3736	2.89115	0.444633	0.594381	5.07363	2.01368	6.81967	0.61235	0.252144
GLCA	1.37994	0.189892	0.281701	0.295702	0.317123	0.858684	0.737764	0.30166	0.170152	0.460767	0.760211	0.389325	0.413246	0.287402	1.21785	0.153531	0.457699	0.176541	1.28392	0.334167	0.698136	0.241337	0.131994	0.396185	0.396185	0.877955	0.353924	1.79498	1.44076	0.392787	0.863966	0.244318	0.194643	0.130108	0.23125	1.59016	0.111776	0.478751	0.401127	0.467218	0.396185	0.811426	0.235505	0.278211	4.7568	0.196274	1.07115	0.396185	0.87029
TLCA	2.05678	0	0	0	1.09167	2.79368	0	0	0	0	0	0	0	0	1.14623	0	0	0	5.14262	0	9.9128	1.14633	2.93108	1.16719	0	0	1.69367	0	0	1.18623	1.52857	0	0	0	1.04736	1.71148	0	0	0	1.9742	0	1.35032	0	0	2.95372	0	3.05489	1.09167	0
GDCA	123.357	3.40086	7.90148	0.616332	4.6476	82.2937	1.59275	3.43299	4.1753	1.14749	23.5689	2.997	58.8531	0.872855	19.3316	2.79649	76.7346	1.29705	4.43325	13.4527	43.9979	19.1429	73.5035	1.26335	4.43325	6.88273	1.8238	0.763655	4.35657	3.6177	3.98294	1.29631	1.45491	0.323349	3.77524	262.452	6.98285	142.133	17.454	17.6731	0.851259	20.8302	2.33068	11.1164	6.06759	8.592	89.8987	2.18586	27.8668
TDCA	49.0904	0	0	0	3.0911	93.0513	1.14683	0	0	0	2.50682	0	5.3116	1.97326	2.52842	0	12.3335	0	8.20376	3.42724	124.822	5.13227	21.6961	0	0	0	0	0	0	22.1272	0	0	0	0	6.30529	85.3471	2.47177	5.7585	5.36272	5.58307	1.05574	4.65666	0	2.60421	1.4074	0	18.5045	0	4.84394
T-ω-MCA	0	0	0	0	0	0	0	0	0	0	0	0	0	0	0	0	0	0	0	0	0	0	0	0	0	0	0	0	0	0	0	0	0	0	0	0	0	0	0	0	0	0	0	0	0	0	0	0	0
Fig 4f
	humans
CA-3S	0	0	0	0	0	19.7205	117.861	0	0	0	0	0	8.56045	0	1.88385	0.483636	11.1569	0	0	0	0.644145	2.84078	0.2	0.775385	0	0.972955	0	0	0	27.9708	0	13.4679	33.969	41.1837	0	0	0	0	0	7.58358	0	21.0037	0	0	1.7718	0	8.0896	0	3.74744
CDCA-3S	1.27401	55.6211	42.76	45.8499	42.76	448.27	366.386	13.1811	0	0.961357	143.651	118.904	85.787	0.865455	79.8527	3.91236	103.04	22.0725	69.2051	10.1854	39.6701	123.466	30.8338	161.283	42.76	0.696364	2.47595	42.76	0.281737	437.616	47.9275	211.363	754.99	546.029	57.3219	12.6813	46.2933	5.53495	2.1221	164.189	211.984	103.637	0	5.51833	32.1923	1.72257	135.386	0.251255	27.3065
UDCA-3S	0	12.191	0.430314	2.68138	0.459075	121.073	74.6363	21.3833	0.283788	0	0	11.5455	28.9407	65.9725	28.4592	5.53127	74.1246	21.3833	4.02381	0	7.14943	35.6687	3.59385	129.332	21.3833	63.1334	7.88911	0	0.765924	131.86	30.4672	300.114	852.513	411.464	12.9623	11.7485	80.744	3.63151	3.01435	135.992	78.187	218.459	0.211111	3.39792	60.7248	17.622	37.5936	0.253384	25.1447
LCA-3S	2.22429	97.18	1.50444	0.373352	0.0827	1091.63	1079.7	3.1639	0.241818	14.5617	319	62.5083	354.968	6.03556	888.181	55.3713	483.269	2.405	42.8031	8.57339	90.5169	779.172	3.97846	13.2094	47.7069	11.5418	75.3641	0.49759	47.7069	82.8203	83.809	52.1432	20.2306	27.8002	1.79255	37.6119	193.68	144.059	24.849	640.463	2.99478	124.961	16.3733	20.7112	194.314	64.0398	637.936	2.52107	305.307
DCA-3S	0	2.05138	0	0	0	600.419	1347.95	1.56856	0	0.264032	178.673	784.929	254.775	329.458	988.646	163.913	325.992	144.827	721.555	229.186	649.5	933.968	575.494	223.984	227.836	2.8465	0.313918	227.836	0.806342	38.0714	9.18858	10.0294	0	0	0	8.9095	132.639	112.667	636.423	226.485	148.116	349.865	124.536	339.859	124.854	999.814	753.892	672.211	786.958
GCA-3S	0.890395	0	0.409427	0.371347	0.243151	1.15132	0.356798	0.465353	0.355	0.739823	0	0	0	0	0	0	0	0	0	0	0	0	0.221538	0	0.464731	0.591818	0.252658	0.692972	0.591759	0.856721	2.14584	11.9713	0.277232	0.95576	0.334135	1.13724	0	0.373333	0	0.464731	1.34522	0.623581	0	0	0	0	0	0	0
TCA-3S	0	0.249247	0	1.15616	0	0	0	0	0	0	0	0	0	0	0	0	0	0	0	0	0	0	0	0	0	0	0	0	0	0.39082	0.766951	0.563068	0	1.5232	0	0	0	0	0	0	0	0	0	0	0	0	0	0	0
GCDCA-3S	0	1.16516	0	1.70057	0	19.2532	0	1.18714	0	0	0	0	1.95371	0	0	0	0	0	0	0	9.85078	1.36738	4.52308	4.93611	0	1.25455	1.44101	0	0	5.15246	2.88891	20.6361	1.16964	1.94885	1.28197	11.2047	0	5.87151	0	1.79495	11.3461	4.32349	0	0	3.13355	0	3.9904	0	2.67302
TCDCA-3S	0	0	0	0	0	2.55211	0	0	0	0	0	0	0.235955	0	0	0	0	0	0	0	0.600622	0.220194	0	0	0	0	0	0	0	2.57869	2.35416	1.61733	0.30914	0.959601	1.51611	2.337	0	0	0	0.268211	2.7513	0.317904	0	0	0	0	0.8992	0	0.234419
GUDCA-3S	0.113559	0	0	0	0	4.05605	0	0	0	0	0	0.756749	0.814831	0	0.517824	0	0	0	0	0	0.948808	0	0.670769	1.9714	0	0	0	0	0	0.598033	0.5258	3.52614	0	0.380492	0.538462	3.13302	0.698667	1.64889	0.570718	1.20842	4.58652	2.25467	0	0	1.68918	0	0.8192	0	0
TUDCA-3S	0	0	0	0	0	0.409211	0	0	0	0	0	0	0	0	0	0	0	0	0	0	0	0	0	0	0	0	0.343544	0	0	0.368525	1.71855	0.366193	0	0.507527	0.424519	0.261827	0	0	0	0	2.07261	0	0	0	0	0	0	0	0
GLCA-3S	3.61215	2.85619	0.67061	2.85619	0.546404	29.0245	2.85619	0.869295	0.573939	1.38673	5.11762	2.23721	27.871	0.876768	15.8956	0.644	18.5177	1.095	2.41483	1.94711	33.8727	15.8241	2.06769	0.717104	2.85619	0.782273	3.90861	0.613052	3.36414	1.17508	8.92921	1.2733	2.85619	2.85619	1.00481	17.6981	3.34133	38.3883	7.18622	12.3436	1.05609	5.55598	0.497778	3.21417	38.8817	1.97146	24.5728	0.474829	9.19767
TLCA-3S	1.15819	0	0	0	0	9.99053	2.62628	0.922199	0	0	0.352079	0.582289	3.80989	0.387475	1.44803	0	3.86885	0.4	0.376976	0.660753	11.4495	5.54835	0.341538	0	0	0.967727	9.83013	0	1.29911	0	9.46397	0	0	0	1.34904	5.78548	0	2.14667	0	3.96421	0	0	0	1.435	3.4977	0	12.9472	0	2.13256
GDCA-3S	0.675706	0	0	0	0.421575	41.4489	0	1.21743	0.307727	0	1.08119	0.15602	5.60944	0.0877	1.97757	0.173091	3.06115	0	0.273171	0.456904	21.6253	3.1534	6.31692	0	0	0.681364	0.472405	0.40241	0.574165	1.64164	3.72857	2.45483	0.411161	0.262366	1.09111	18.8557	1.68	13.8303	3.37608	2.85305	0	8.36576	0	0.4375	0.345792	0	17.104	0	10.2135
TDCA-3S	0	0	0	0	0	1.52632	0.431722	0	0	0	0	0.161592	0.311461	0.144242	0.145272	0	0.336538	0	0	0.335063	5.00518	0.87534	0.175385	0	0	0	0.260506	0	0	0.121311	1.6855	0	0	0	0.2625	2.07166	0	0.161212	0.206316	0.504	0	0.315459	0	0	0	0	2.5632	0	0.732558
Fig 4g
	humans
TBAs	1.28272	0.492763	0.884377	0.62181	2.59235	0.993747	1.06501	0.854762	1.4997	3.28068	1.53718	1.23655	0.900778	1.50352	1.52362	0.888804	1.15239	1.52634	1.40873	0.802479	0.653468	0.980592	0.42454	0.280704	0.935026	1.20757	1.06312	2.04802	1.14895	0.453345	1.2291	0.900831	0.427392	1.41972	1.84544	1.15775	2.95386	0.641625	0.933592	1.47342	1.59903	1.07713	2.03299	1.00473	1.46745	1.42341	1.12418	1.48559	0.849221
PBAs	5.59226	0.691317	16.0782	0.497259	13.7616	2.05195	3.26671	1.26347	1.95729	5.96323	10.4337	11.1499	1.44669	2.96036	3.63102	3.2046	6.31765	18.6428	4.35627	2.3413	0.934253	2.01238	0.27119	0.240933	16.4937	1.2291	2.11604	8.32434	2.29005	0.359212	4.71944	0.940396	3.11965	19.1033	123.488	6.33716	2.14581	1.87544	1.5844	32.0665	107.477	1.89982	1.75318	1.4782	15.8483	2.52214	1.34164	3.41873	3.13241
SBAs	0.977017	0.400217	0.872426	0.677044	2.43752	0.883897	1.00615	0.848721	1.49778	3.26997	1.51319	1.21632	0.854239	1.49722	1.47552	0.885053	0.952678	1.30527	1.34266	0.786252	0.525667	0.86355	0.636834	0.349305	0.878625	1.20739	1.04847	2.02258	1.14747	0.574682	1.19725	0.843972	0.300376	0.85641	0.518739	0.84828	2.96568	0.562701	0.92183	1.3019	0.747444	1.04875	2.03481	0.991603	1.31471	1.41869	1.11337	1.48217	0.833112
[truncated: 29 more columns]

## Sheet: Fig 5a-d
Fig 5a				Fig 5b				Fig 5c				Fig 5d
G-conj BAs	T-conj BAs	unconj BAs		G-conj BAs	T-conj BAs	unconj BAs		G-conj BAs	T-conj BAs	unconj BAs			humans
102.602	7.59011	0.397893		0.135469	0.432633	0.0177389		0.000680473	0.0514906	0.00837776		CA group	0.0707079	0.186668	0.0156489	0.0807738	0.0285845	0.129058	0.449906	0.0164305	0.0924411	0.446895	0.0103477	0.0431831	0.315612	0.0437424	0.0530911	0.071946	0.206529	0.128349	0.209335	0.11627	1.31933	0.0692734	1.10911	0.142922	0.0475211	0.176768	0.0310009	0.142549	0.0849915	0.242081	0.134997	0.0350099	0.204583	0.0318194	0	0.0387251	0.445579
48.841	8.20247	0.239755		0.177728	0.329801	0.0129919		0.00379453	0.0577933	0.00849082		CDCA group	163.43	38.3354	123.897	75.2098	22.427	51.6778	118.557	48.6717	81.0976	73.8686	#DIV/0!	47.1467	40.4921	20.2257	160.738	23.5813	69.3755	40.4722	102.32	42.3761	173.678	37.3588	41.5297	58.4042	30.1229	59.9455	60.7035	97.6819	69.6838	126.926	46.789	39.1029	94.902	21.4196	44.629	37.3357	300.255
54.4149	1.86497	0.113362		0.217251	0.563786	0.0230169		0.00115531	0.0321215	0.00184515		UDCA group	8.55369	9.25352	3.08525	47.1647	14.4742	6.20736	17.2011	9.30431	2.91048	5.79015	3.28158	12.1643	11.4155	10.5012	28.5097	3.60325	9.0762	5.24569	4.16973	13.0581	50.6627	19.3289	1.71034	8.50775	15.6494	12.4815	6.82865	7.46361	37.7834	45.1403	10.6983	12.7931	13.4023	18.8179	1.87004	9.22727	6.20451
44.9142	5.15473	0.121919		0.0838604	0.159497	0.012964		0.00816301	0.0599519	0.0101691		DCA group	47.0668	111.102	48.6932	5.0394	14.3434	144.422	148.763	32.4822	80.7339	76.6895	65.6248	23.647	1.55325	13.2282	49.1373	22.8585	87.9691	97.7653	81.5458	58.337	285.42	21.7757	772.506	55.2829	38.6546	73.7718	24.3512	12.9198	49.0721	47.6991	66.6642	14.8013	78.6548	14.3901	139.292	38.995	48.8276
66.7329	12.9093	0.266436		0.638749	0.145498	0.0264251		0	0.154792	0.00375328		LCA group	391.588	775.736	166.411	334.745	1604.65	255.978	832.277	244.314	465.856	293.343	554.452	290.025	6.9148	634.431	136.149	36.6555	196.773	44.4694	1003.22	65.3028	370.515	127.718	578.47	241.367	1714.83	830.667	568.146	167.076	13.4815	310.445	2888.19	671.714	2467.97	430.485	261.158	300.473	1219.92
71.1917	8.0626	0.175397		0.256434	0.549648	0.0150213		0.00771127	0.121319	0.0106806
80.4226	7.94139	0.421678		0.165877	0.345461	0.0181612		0.010388	0.071836	0.0141293
39.6023	4.18072	0.131031		0.0652662	0.658066	0.00320394		0.00177611	0.573075	0.0113903
24.8383	1.83427	0.13876		0	0.00919265	0.0019075		0	1.07491	0.00476493
30.0357	5.4092	0.153775		0	0.783832	0.00103887		0.155825	0.813382	0.00388547
84.3253	4.36786	0.326129		0.389662	0.523023	0.0153115		0	3.20612	0.0101454
41.2017	5.0178	0.15198		0.259414	0.386665	0.0155875		0.0236869	1.00372	0.0048657
10.4578	0.58002	0.0480489		0	0.0239717	0.00266812		0.0218478	3.6936	0.015151
45.5489	9.44257	0.214774		0	0.0589882	0.0023834		0.00895049	1.99316	0.00906139
37.4372	6.75123	0.144617
8.21635	0.852325	0.0203387
49.532	3.87594	0.111544
10.9189	3.79792	0.0751076
47.3882	4.25407	0.402353
36.8387	3.44866	0.138579
95.1448	1.59006	0.411602
48.322	3.60427	0.111858
93.9461	7.55978	0.609315
43.6115	2.56826	0.208413
69.0124	11.687	0.204186
83.5774	12.3894	0.398643
49.3321	7.84954	0.104822
60.9175	34.6589	0.104778
41.2555	2.21027	0.105389
54.9952	8.05765	0.129841
61.4575	12.2121	0.529869
36.9534	7.87492	0.153026
53.7812	9.73688	0.360231
40.867	49.6401	0.204608
72.9986	6.46744	0.0589729
76.4436	3.44558	0.143007
117.486	27.3541	0.36334
61.3024	11.2025	0.220102
14.0922	4.16636	0.0270532
48.9785	13.5911	0.0923447
35.58	5.53241	0.136739
60.3285	4.6106	0.803051
49.6512	8.33397	0.185934
16.7946	4.45477	0.0349518
63.3674	7.87465	0.304897
33.9414	9.9875	0.0136997
18.6479	3.65622	0.258798
20.8925	5.60976	0.0387695
17.1132	3.64581	0.0267338
12.7949	3.6407	0.101955
[truncated: 41 more columns]

## Sheet: Fig 5e-o
Fig 5e				Fig 5f				Fig 5g				Fig 5h				Fig 5i				Fig 5j				Fig 5k				Fig 5l				Fig 5m					Fig 5n				Fig 5o
humans	rats	mice		humans	rats	mice		humans	rats	mice		humans	rats	mice		humans	rats	mice		humans	rats	mice		humans	rats	mice		humans	rats	mice		humans	rats	mice			humans	rats	mice		humans	rats	mice
3.94904	0.0388301	0.0821125		1.32905	0.26634	2.88213		34.2767	427.403	33.8295		14.0904	81.9672	36.1658		1.76553	41.7707	7.01683		0.0328346	0	0		0.00662504	0	0		0	846.707	269.175		0.0134792	0.71804	0			0	1.81266	0.497047		0.0882686	0.16502	0.167025
0.274186	0.0528779	0.13414		0.12586	0.24394	1.00116		375.71	383.595	88.6856		1.95673	75.6276	1.40667		0.866598	48.9274	0.760453		0.0101109	0	0.243317		0.0666774	0	0		0	1657.72	3.71948		0.0358641	0.421763	0.199161			0.112846	6.86384	0.0251832		0.0378736	0.18131	0.20989
0.141292	0.0771069	0.0707797		0.0400615	0.229668	0.261769		863.66	431.04	313.604		1344.44	42.7496	0.0753074		63.3062	62.0716	0.11009		0	0	0.10771		0	0	0.826541		0	1253.05	3.49118		0.164299	0	0.568104			0	2.40148	0.0168831		0.374722	0.17425	0.156809
0.373891	0.0312168	0.0906206		0.409786	0.140416	5.04706		175.961	695.23	18.7299		1.32416	81.3276	2.1503		0.861155	78.4591	0.661799		0.0722241	0	0.359558		0.394022	0	0.522004		0.0475598	1992.65	5.50679		0.248975	0	0.305969			0.483576	0.815986	0.0795659		0.147864	0.303177	0.236631
0.77919	0.0285629	0.0857452		0.315014	0.150964	0.937721		131.113	753.049	100.546		72.6338	126.495	1.1116		7.17454	91.2035	1.5251		0	0	0.225285		0	0	1.05952		0	1417.28	4.76725		0	0.699809	0.436324			0	2.90362	0.0273959		0.292951	0.189224	0.1614
1.85749	0.0310078	0.086455		1.5389	0.142869	2.32542		38.0772	736.809	41.4107		8.76186	103.314	4.59984		3.15679	43.804	1.0479		0.02999	0	0		0.122575	0	1.79542		0	1092.76	5.20207		0.0874553	0.174639	0.709312			0.23222	0.864149	0.0598586		0.0907087	0.294564	0.141499
0.23738	0.035838	0.0857452		0.108732	0.191263	0.937721		437.343	547.969	100.546		535.529	91.0413	1.1116		57.7406	51.691	1.5251		0	0	0.225285		0	0	1.05952		0	1927.3	4.76725		0	0.532797	0.436324			0	3.10005	0.0273959		0.0982629	0.219848	0.1614
0.888922	0.143932	0.265421		0.69119	0.399976	1.05103		84.574	209.772	82.4339		68.2794	26.6445	1.69875		45.113	21.0795	8.97764		0	0	0		0	0	0		0	232.809	4.07341		0	0	0			0	4.09873	0		0.219027	0.235947	0.183354
0.501397	0.114648	0.17706		0.130231	0.557786	2.30365		254.947	168.254	41.7528		245.357	16.5342	3.37904		124.49	19.9715	2.13559		0	0	0		0	0	0		0	220.202	54.634		0	0	0.24566			0	4.41093	0.0597863		0.267306	0.201683	0.185627
0.228212	0.171141	0.55553		0.0672553	0.163317	0.923174		580.099	341.726	77.3814		268.437	28.0068	33.2232		81.5447	25.7101	9.79714		0	0	0		0	0	0		0	150.002	47.7269		0.303378	0	0			0	1.89215	0.736893		0.198542	0.26229	0.139716
0.334713	0.0469725	0.169403		0.0510656	0.172347	5.66657		421.762	544.743	17.3551		361.149	53.5301	6.76695		106.735	31.0635	7.39802		0.278137	0	0.10224		0.335488	0	0.375436		0	181.027	14.1695		0.19536	0	0.21609			0.763685	3.13126	0.0494589		0.0996454	0.295482	0.197667
0.099041	0.0897879	0.383957		0.0537488	0.24375	1.03704		921.645	379.693	88.0658		428.328	59.8755	3.4984		126.505	28.2028	12.2153		0.658334	0	0		0.861553	0	0		0	222.398	3.32928		0.303775	0	0			0.798964	7.21208	0.0288454		0.125698	0.237326	0.1317
2.78811	0.0937712	0.376737		0.277419	0.340868	5.35323		54.1423	268.506	17.0083		10.8963	32.3669	1.8533		4.3458	48.0406	1.20063		0.0995086	0	0.157227		0.20792	0	0.410008		0	194.224	4.97271		0.239414	0	0.143281			0.145419	19.9912	0.0610287		0.0542223	0.227517	0.103955
0.132006	0.1048	0.331028		0.0993223	0.263744	2.06723		546.755	321.249	44.5541		205.087	34.6871	6.58345		74.3475	32.9231	4.32911		0.207789	0	0.351288		1.06669	0	0.978774		0	191.528	19.3462		0.494179	0	0.199751			0.726375	4.38918	0.0969035		0.102146	0.2461	0.151783
0.572358				0.0732863				338.769				38.0897				11.9502				0.20946				0.259062				0				0.337092					0.453664				0.117321
0.0561114				0.0362453				1306.41				622.996				125.577				0.507841				0.784278				0				0.299528					1.16145				0.17774
5.02286				0.773997				22.2183				24.7077				2.10199				0.727707				0.189942				0				0.095744					0.641708				0.0840569
0.0670179				0.0461692				1315.65				72.7465				3.56963				0.178826				0.341649				0.0325762				0.106561					1.12004				0.108221
0.156054				0.0742741				736.48				40.6003				10.5708				0.114488				0.155841				0				0.162527					0.134113				0.0186129
0.828436				0.312286				131.824				87.6813				26.0278				0.0863542				0.235186				0				0.171587					0.186615				0.115942
1.3881				3.47965				22.0565				1.82684				0.730025				0.0623372				0.0294033				0.000822047				0.0464517					0.0258555				0.0698362
0.394706				0.110144				326.557				7.64928				2.1102				0.109478				0.0776475				0				0.0961969					0.122612				0.09619
2.28382				0.612318				46.7962				0.536952				0.493121				0.0569732				0.0331172				0.00182732				0.0745036					0.0409875				0.0438909
0.278972				0.162666				314.037				0.00779257				0.00476432				0.0470889				0.132897				0.00193904				0.00404201					0.381577				0.09903
0.457043				0.133364				285.151				269.721				12.2305				0				0				0				0					0				0.117856
0.726519				0.209154				163.29				126.161				84.5473				0				0				0				0					0				0.214696
0.2565				0.313164				393.815				71.5427				27.2535				0				0.244373				0.250486				0.0596926					0.353896				0.137983
0.309177				0.111376				365.767				236.959				146.312				0				0				0				0					0				0.249573
0.159815				0.0445982				923.706				802.68				195.941				0				0				0				0					0				0.40929
0.490251				1.358				57.3015				0.202375				0.183757				0.021283				0.12961				0				0.101692					0.442722				0.0892303
0.715903				0.397639				205.254				117.819				31.5287				0				0.171053				0.130624				0.129567					1.78276				0.154589
0.233446				0.332224				225.461				0.0946038				0.00602504				0.0259991				0.15839				0.00324646				0.0461165					0.424759				0.168639
0.444895				0.160547				251.343				18.4187				0.479405				0.0500574				0.740114				0.032449				0.579772					4.95268				0.0258407
0.21102				1.15158				75.5367				0.116102				0.0378924				0				0				0				0.063492					0				0.0927775
0.281164				0.66621				124.756				56.9883				0.0607208				0				0				0				0.0985985					0				0.101238
8.15129				4.02828				11.8534				15.3731				1.512				0				0				0				0.0576227					0				0.139613
0.328605				0.0559449				475.907				64.688				77.5675				0.0950097				0.242263				0				0.380271					0.205738				0.130768
2.81827				0.163911				48.1355				15.1854				3.46441				0.104441				0.138412				0.00227222				0.108855					0.13988				0.0823625
0.916332				0.180886				143.517				48.6993				21.5909				0.111659				0.221505				0				0.254128					0.0926351				0.0962199
0.587745				0.135024				222.284				197.439				4.02495				0				0				0				0.250479					0				0.064422
0.856358				0.272349				145.25				0.913134				0.00488756				0				0				0				0.0816715					0				0.128747
1.09149				0.171374				115.999				28.0574				9.76906				0.108651				0.38849				0.0164554				0.761352					1.65959				0.0702607
0.0804175				0.00765052				1186.49				151.026				71.8142				0				0.150283				0.167553				0.206538					0.252873				0.163236
0.7532				0.0840612				213.173				34.0483				18.3677				0.0727827				0.153821				0.0191576				0.31322					0.24106				0.0809855
2.78935				0.229339				63.5764				92.9858				4.41804				0.276615				0.479939				0				0.133737					0.354926				0.110498
0.182541				0.0583535				601.386				203.085				78.4366				0.137168				0.285231				0.104509				0.306088					0.610265				0.207975
3.09492				0.879401				34.5612				18.3755				15.3308				0.0538073				0.0922665				0				0.140226					0.0844767				0.0863775
0.0609778				0.0228517				1718.47				493.702				153.929				0.403004				0.340063				0				0.395177					0.494939				0.12033
0.724747				0.138305				225.342				134.288				28.9624				0.181779				0.220855				0				0.183932					0.373791				0.0974873
0.305116								513.468				66.3027				18.1548				0.121783				0.234893				0				0.215327					0.249536				0.104289

## Sheet: Fig 6
Fig 6a				Fig 6b				Fig 6c				Fig 6d				Fig 6e				Fig 6f				Fig 6g				Fig 6h				Fig 6i
	log2FC	-log2p			log2FC	-log2p			log2FC	-log2p			log2FC	-log2p			log2FC	-log2p			log2FC	-log2p			log2FC	-log2p			log2FC	log2p			log2FC	log2p
CA	-0.307798	1.19945		CA	-0.806208	10.625		CA	0.417409	1.03472		CA	0.142536	0.371698		CA	1.52797	4.33695		CA	0.735078	1.29445		CA	1.02132	1.06931		CA	-0.514205	2.52262		CA	1.60992	2.57234
GCA	0.519472	2.48525		GCA	-0.0683339	0.238102		GCA	0.645812	2.47896		GCA	0.296042	1.73053		GCA	1.98033	6.06947		GCA	2.51376	4.03933		GCA	-0.513755	1.00517		GCA	-0.1987	1.13779		GCA	-0.0715266	0.230703
TCA	0.787916	4.42378		TCA	0.175006	0.894408		TCA	1.18807	4.937		TCA	0.683638	3.13368		TCA	1.91028	8.18469		TCA	3.62562	4.88643		TCA	-0.579093	0.966255		TCA	-0.153822	0.71365		TCA	-0.899122	2.31563
CDCA	-0.857426	6.07639		CDCA	0.573324	2.19516		CDCA	-0.355107	2.23755		CDCA	-0.575319	1.03518		CDCA	-0.612176	1.2331		CDCA	2.94291	7.13427		CDCA	-0.573068	1.07012		CDCA	1.61969	6.79158		CDCA	0.70535	3.17627
GCDCA	0.529504	2.42383		GCDCA	1.1007	4.6844		GCDCA	0.330435	0		GCDCA	-0.164252	0.742625		GCDCA	-0.772505	1.95898		GCDCA	2.69831	3.49094		GCDCA	-0.414405	0.788284		GCDCA	0.0523152	0.239806		GCDCA	-0.459786	2.46244
TCDCA	0.441747	2.12507		TCDCA	1.17511	5.74306		TCDCA	1.95962	7.1695		TCDCA	0.0819308	0.267054		TCDCA	-0.24769	0.419748		TCDCA	3.84319	3.67685		TCDCA	-0.496372	0.655765		TCDCA	1.65052	16.6448		TCDCA	-0.974321	4.96183
α-MCA	0.387682	2.90259		α-MCA	-0.885663	4.28186		α-MCA	-0.141715	0.3669		α-MCA	0.632553	4.34704		α-MCA	1.36125	4.23658		α-MCA	2.36825	3.76868		α-MCA	0.0558957	0.229703		α-MCA	2.49506	17.6719		α-MCA	1.00857	3.70069
β-MCA	0	0		β-MCA	-0.863751	4.09595		β-MCA	0.331165	1.08915		β-MCA	-0.0398636	0.0893608		β-MCA	-1.63741	2.74142		β-MCA	1.66863	3.81155		β-MCA	0.377701	0.351666		β-MCA	1.41361	10.3635		β-MCA	1.9481	5.76546
T-α-MCA	0.00421328	0.0238283		T-α-MCA	0.786364	6.67623		T-α-MCA	1.42452	4.47597		T-α-MCA	1.69042	7.07822		T-α-MCA	1.16998	2.82485		T-α-MCA	3.13904	2.78553		T-α-MCA	1.36023	1.18222		T-α-MCA	0	0		T-α-MCA	-0.909831	0
T-β-MCA	0	0		T-β-MCA	0.549323	2.87442		T-β-MCA	1.29713	4.20021		T-β-MCA	0	0		T-β-MCA	0.410501	0.757932		T-β-MCA	3.80278	4.75611		T-β-MCA	1.14978	3.44962		T-β-MCA	0.257487	0		T-β-MCA	-0.210457	0.59358
HCA	-0.604167	3.64462		HCA	-1.02016	7.97663		HCA	1.29267	1.53204		HCA	0.0459032	0.105071		HCA	-0.533579	0.907152		HCA	3.03483	4.6745		HCA	0.220234	0.526984		HCA	2.38467	15.2828		HCA	0.264431	1.20612
GHCA	-0.0280127	0.0995791		GHCA	0.360985	0		GHCA	0	0		HDCA	0.781746	2.96955		HDCA	-1.23088	1.54188		HDCA	1.91888	4.2105		HDCA	-0.332273	2.004		HDCA	0.187092	0.816383		HDCA	-0.367292	1.05168
THCA	0.677144	1.804		THCA	0	0		THCA	0	0		GHCA	-0.282812	0.870325		GHCA	0	0		GHCA	3.05557	4.121		GHCA	0.42834	2.57979		GHCA	0	0		GHCA	0	0
HDCA	-0.563149	3.0617		HDCA	0.152913	0.475079		HDCA	-1.46819	10.704		GHDCA	-0.652472	0.988684		GHDCA	0	0		GHDCA	2.51441	3.75999		GHDCA	-1.6851	3.72367		GHDCA	-0.217919	0.76039		GHDCA	0	0
GHDCA	-0.650365	2.50339		GHDCA	1.1415	2.97739		GHDCA	0	0		THCA	0	1.5485		THCA	-0.41088	1.4505		THCA	3.40093	4.46354		THCA	0.176625	0.404957		THCA	0	0		THCA	0	0
THDCA	-0.0183105	0.102996		THDCA	1.13675	6.46518		THDCA	-0.532447	2.31704		THDCA	0.313835	0.212708		THDCA	1.5698	3.40691		THDCA	2.97435	3.50552		THDCA	-0.203435	0.50174		THDCA	0.830331	6.95668		THDCA	0	0
UDCA	-0.938566	6.25564		UDCA	-0.985589	4.28993		UDCA	0.525757	2.32069		UDCA	0.26352	1.18153		UDCA	-2.12214	2.89888		UDCA	2.5023	4.53512		UDCA	-0.999602	2.3642		UDCA	0	0		UDCA	0.464435	2.08598
GUDCA	-0.544954	1.65089		GUDCA	-0.057446	0.336404		GUDCA	-0.0481453	0.167513		GUDCA	-0.411827	1.48844		GUDCA	-0.109887	0.298512		GUDCA	0.260014	0.483468		GUDCA	-0.857827	1.47628		GUDCA	0	0		GUDCA	0	0
TUDCA	-0.101001	0.192171		TUDCA	-0.155668	0.412974		TUDCA	2.27555	8.84743		TUDCA	-0.869161	1.32719		TUDCA	2.31653	3.15354		TUDCA	0.475629	0.879718		TUDCA	-0.894822	3.15247		TUDCA	-0.201457	0.678855		TUDCA	-0.970055	4.80117
LCA	-0.255016	1.40142		LCA	1.63146	8.749		LCA	0.539315	3.71404		LCA	0.616236	3.12326		LCA	-1.48739	1.99742		LCA	0.792524	2.03222		LCA	-0.0559693	0.256991		LCA	2.2814	32.139		LCA	-0.98881	4.09533
GLCA	-0.150017	0.577463		GLCA	0	0		GLCA	0	0		GLCA	0	1.72379		GLCA	0	0		GLCA	1.33296	1.57611		GLCA	-0.621404	2.35244		GLCA	1.47567	12.2141		GLCA	-0.544468	3.84406
TLCA	0.603744	1.72036		TLCA	-0.000387682	0.00233698		TLCA	0	0		TLCA	0	0		TLCA	0	0		TLCA	0	1.56897		TLCA	0.704139	2.24513		TLCA	0.898916	0		TLCA	0	0
7-ketoLCA	-0.334144	1.55831		7-ketoLCA	1.83454	6.26388		7-ketoLCA	-0.527777	1.77695		7-ketoLCA	-0.61251	1.39121		7-ketoLCA	-1.80989	2.60165		7-ketoLCA	1.92231	5.55826		7-ketoLCA	-1.03393	3.45174		7-ketoLCA	0	0		7-ketoLCA	1.32937	3.13594
12-ketoLCA	-0.187371	0.595873		12-ketoLCA	-0.231517	0		12-ketoLCA	0.122053	0.604428		12-ketoLCA	-0.688701	1.3912		12-ketoLCA	0	0		12-ketoLCA	2.21977	3.99253		12-ketoLCA	-0.329071	1.31131		12-ketoLCA	0.80267	7.94023		12-ketoLCA	-0.419997	1.05379
DCA	-0.0490502	0.17285		DCA	-1.50645	11.8185		DCA	-0.10344	0.609146		DCA	0.250158	0.518228		DCA	-1.7767	2.26933		DCA	2.92121	4.84307		DCA	-0.0922828	0.484108		DCA	0.995823	7.13165		DCA	-0.284903	1.30084
GDCA	0.378346	1.76206		GDCA	0.252267	0.397206		GDCA	-0.774221	2.98016		GDCA	0.488771	1.69994		GDCA	0.245922	0.450869		GDCA	0	1.56897		GDCA	-0.0678271	0.100929		GDCA	0	0		GDCA	0	0
TDCA	0.312976	1.86576		TDCA	-0.37502	1.66276		TDCA	-0.121228	0.544319		TDCA	0	0		TDCA	-0.78427	1.8834		TDCA	0	6.55517		TDCA	0.988991	1.60701		TDCA	0	0		TDCA	0	0
23-norDCA	0.206762	1.53218		23-norDCA	0.131915	1.40045		23-norDCA	4.00837	13.6436		23-norDCA	0	0		23-norDCA	0	0		23-norDCA	0	0		23-norDCA	0.753528	2.73491		23-norDCA	0	0		23-norDCA	0	0
7-ketoDCA	0	0		7-ketoDCA	-2.82923	8.28016		7-ketoDCA	0.239907	0.418939		7-ketoDCA	-0.210147	0.519794		7-ketoDCA	0	0		7-ketoDCA	0.151908	0.257648		7-ketoDCA	-0.0183967	0.0183842		7-ketoDCA	0	0		7-ketoDCA	2.93104	2.73383
3-ketoCA	-0.429352	2.586		3-ketoCA	0.219285	0.730256		3-ketoCA	0.261518	0.695857		3-ketoCA	0	0		3-ketoCA	1.71042	3.96341		3-ketoCA	1.23445	2.54754		3-ketoCA	-0.359018	0.359321		3-ketoCA	0	0		3-ketoCA	2.01316	4.9958
allo-LCA	0.243132	0.617575		allo-LCA	2.15012	21.0307		allo-LCA	-0.859576	5.0398		dehydroLCA	0	0		dehydroLCA	-0.435272	0.650662		dehydroLCA	0.486376	0.907624		dehydroLCA	-0.825872	2.33446		dehydroLCA	1.85858	11.2381		dehydroLCA	-0.576826	1.20272
iso-LCA	-0.936538	4.53254		iso-LCA	0.494803	2.50968		iso-LCA	-0.177524	0.43862		allo-LCA	0	0		allo-LCA	0.0337569	0.0433481		allo-LCA	0.186462	0.282052		allo-LCA	1.09147	1.63126		allo-LCA	3.52775	17.4495		allo-LCA	-3.18989	11.4788
6-ketoLCA	-0.179793	4.19496		6-ketoLCA	0.871518	2.60271		6-ketoLCA	-1.09517	7.80868		iso-LCA	0	0		iso-LCA	-1.12603	1.54321		iso-LCA	0.385999	0.713502		iso-LCA	-0.258744	0.96497		iso-LCA	2.11866	14.7106		iso-LCA	-0.904301	3.26767
β-HDCA	0.245651	1.14026		β-HDCA	-0.404247	1.6656		β-HDCA	-0.610957	3.86203		6-ketoLCA	0	0		6-ketoLCA	-1.02448	1.39133		6-ketoLCA	1.67581	3.93177		6-ketoLCA	0.109764	0.329691		6-ketoLCA	-0.25624	1.16808		6-ketoLCA	0.372886	0.656409
β-UDCA	-1.41954	6.75494		β-UDCA	-2.31829	4.14754		β-UDCA	-0.541881	2.04023		β-HDCA	0	0		β-HDCA	-1.04206	1.29394		β-HDCA	3.37554	3.46327		β-HDCA	-0.446975	1.78358		β-HDCA	-0.157318	0.474479		β-HDCA	-0.265811	0.524229
6,7-diketoLCA	0	0		6,7-diketoLCA	1.53419	6.83142		6,7-diketoLCA	0	0		β-UDCA	-1.91124	6.91003		β-UDCA	-2.9551	3.26069		β-UDCA	2.74427	3.93684		β-UDCA	-1.04288	2.491		β-UDCA	0.879005	8.72914		β-UDCA	-0.344144	1.15193
12-ketoCDCA	0	0		12-ketoCDCA	1.64785	6.15638		12-ketoCDCA	-0.853516	3.45112		7,12-diketoLCA	-1.52931	2.7004		7,12-diketoLCA	1.91692	2.62099		7,12-diketoLCA	1.55886	1.98768		7,12-diketoLCA	-0.767993	1.85208		7,12-diketoLCA	0	0		7,12-diketoLCA	0.765607	1.09457
ω-MCA	-0.28201	1.36605		ω-MCA	-0.59004	2.59985		ω-MCA	0.322885	1.51527		6,7-diketoLCA	0	2.30182		6,7-diketoLCA	-0.232103	0.676068		6,7-diketoLCA	0	2.94703		6,7-diketoLCA	0	0		6,7-diketoLCA	0	0		6,7-diketoLCA	-0.12274	0
T-ω-MCA	0	0		T-ω-MCA	0.429939	4.98293		T-ω-MCA	1.49886	4.72087		12-ketoCDCA	0	0		12-ketoCDCA	-1.787	2.50879		12-ketoCDCA	2.6265	4.33094		12-ketoCDCA	0.403748	0.719623		12-ketoCDCA	2.32719	14.8532		12-ketoCDCA	0.633239	1.71102
muroCA	0	0		muroCA	-1.28914	5.31153		muroCA	-0.885194	3.65824		ω-MCA	0.163735	0.409758		ω-MCA	-0.801179	1.1192		ω-MCA	2.01797	3.72258		ω-MCA	0.104501	0.102548		ω-MCA	0.555939	2.40794		ω-MCA	-0.352545	1.30284
DHCA	0	0		DHCA	0	0		DHCA	0	0		T-ω-MCA	0	0		T-ω-MCA	-0.134304	0.405088		T-ω-MCA	3.53361	6.44291		T-ω-MCA	0	0		T-ω-MCA	0	0		T-ω-MCA	0.399029	3.2901
UCA	0	0		UCA	-4.12623	10.4257		UCA	0.968656	1.96654		muroCA	0	0		muroCA	-0.614715	0.921343		muroCA	2.79249	4.21579		muroCA	0.0653309	0.164018		muroCA	-0.06893	1.2992		muroCA	0.0143349	0.10601
ACA	0	0		ACA	-0.222298	0		ACA	-3.0474	0		DHCA	0.889421	4.20527		DHCA	0.118087	0.145006		DHCA	0	0		DHCA	0	0		DHCA	0	0		DHCA	-1.23768	5.85106
CA-3S	0	0		CA-3S	0	0		CA-3S	0	0		UCA	-0.582656	1.17154		UCA	-0.455844	0.664829		UCA	2.99087	10.6223		UCA	0.176209	0.426531		UCA	0.15254	0.580508		UCA	-0.244463	0.769327
GCA-3S	-0.0289191	0.111024		GCA-3S	0	0		GCA-3S	0	0		ACA	0	0		ACA	0	0		ACA	2.00148	3.90157		ACA	0.0337246	0.107859		ACA	0	0		ACA	0	0
TCA-3S	0.221971	1.57173		TCA-3S	-0.301821	0		TCA-3S	-2.969	11.4953		GDHCA	0	0		GDHCA	0	0		GDHCA	-1.37273	10.5784		GDHCA	-0.354605	0.378792		GDHCA	-1.50542	14.3829		GDHCA	0.69039	2.35302
CDCA-3S	-0.39851	1.16503		CDCA-3S	1.30626	5.88306		CDCA-3S	0	0		TDHCA	0	0		TDHCA	0	0		TDHCA	0	0		TDHCA	1.33821	2.34682		TDHCA	0	0		TDHCA	-0.422518	0.402614
GCDCA-3S	-0.487361	4.82497		GCDCA-3S	0	0		GCDCA-3S	0	0		CA-3S	0.222368	0.395676		CA-3S	2.257	3.13132		CA-3S	0	0		CA-3S	0.160519	0.176308		CA-3S	0	0		CA-3S	0	0
TCDCA-3S	-0.102302	0.598369		TCDCA-3S	2.27873	15.7535		TCDCA-3S	0	0		GCA-3S	0.121688	0.454119		GCA-3S	2.54871	9.2156		GCA-3S	-0.0171512	0.0172026		GCA-3S	-1.47078	1.6364		GCA-3S	0	0		GCA-3S	-3.15682	10.6497
UDCA-3S	-1.05591	6.02954		UDCA-3S	-1.8621	15.2768		UDCA-3S	0	0		TCA-3S	0.719903	2.19553		TCA-3S	1.92158	10.8151		TCA-3S	-0.87861	4.12522		TCA-3S	-0.206801	0.27292		TCA-3S	0	0		TCA-3S	-0.300414	0.424307
GUDCA-3S	-1.44895	5.42926		GUDCA-3S	0	0		GUDCA-3S	0	0		CDCA-3S	-0.109346	0.20611		CDCA-3S	1.70441	3.81992		CDCA-3S	0	0		CDCA-3S	-0.422776	0.946812		CDCA-3S	3.05214	2.29872		CDCA-3S	0	0
TUDCA-3S	-0.758556	3.18361		TUDCA-3S	0.186221	5.07114		TUDCA-3S	0	0		GCDCA-3S	-0.2437	1.53119		GCDCA-3S	-0.357945	0.578868		GCDCA-3S	0	4.50394		GCDCA-3S	0.0277307	0.0488322		GCDCA-3S	0	0		GCDCA-3S	0	0
LCA-3S	0.556149	1.48907		LCA-3S	0	0		LCA-3S	0	0		TCDCA-3S	0.292635	1.60909		TCDCA-3S	-1.00545	2.08477		TCDCA-3S	0	0		TCDCA-3S	-0.503091	0.94698		TCDCA-3S	0	0		TCDCA-3S	0	0
GLCA-3S	-0.756789	4.21861		GLCA-3S	0	0		GLCA-3S	0	0		UDCA-3S	-0.459878	1.51812		UDCA-3S	-0.675476	2.77038		UDCA-3S	1.59436	5.27979		UDCA-3S	-1.63237	3.08426		UDCA-3S	1.74326	4.26204		UDCA-3S	1.06644	2.86861
TLCA-3S	-0.173259	0.607772		TLCA-3S	1.70797	7.17314		TLCA-3S	-0.0042258	0.115584		GUDCA-3S	-0.892227	3.9591		GUDCA-3S	0	0		GUDCA-3S	0	0		GUDCA-3S	-0.363593	0.868586		GUDCA-3S	0	0		GUDCA-3S	0	0
DCA-3S	0.240372	0.914495		DCA-3S	0	0		DCA-3S	0	0		TUDCA-3S	-0.211462	0.594104		TUDCA-3S	0.131308	0.412849		TUDCA-3S	0	0		TUDCA-3S	-0.889185	0		TUDCA-3S	0	0		TUDCA-3S	0	0
GDCA-3S	-0.0412297	0.1277		GDCA-3S	0	0		GDCA-3S	0	0		LCA-3S	0.252191	0.406809		LCA-3S	-0.501787	1.61162		LCA-3S	0	0		LCA-3S	0.825747	2.13515		LCA-3S	2.54622	9.1504		LCA-3S	0	0
TDCA-3S	0.580621	2.24258		TDCA-3S	0.632022	2.69716		TDCA-3S	0	0		GLCA-3S	-0.252261	0.864992		GLCA-3S	-0.884017	3.17477		GLCA-3S	0	0		GLCA-3S	-0.160353	0.363545		GLCA-3S	0	0		GLCA-3S	0	0
unsulfated BAs	-0.0571342	0.30006		unsulfated BAs	0.350429	1.83473		unsulfated BAs	0.801308	3.66494		TLCA-3S	0.308228	1.02556		TLCA-3S	0	0		TLCA-3S	0	0		TLCA-3S	-1.10554	3.40827		TLCA-3S	0	0		TLCA-3S	0	0
sulfated BAs	-0.388869	2.43524		sulfated BAs	1.16536	8.18121		sulfated BAs	-2.90998	12.7441		DCA-3S	0.925366	4.14697		DCA-3S	1.16243	3.71132		DCA-3S	2.41787	3.52275		DCA-3S	0.719361	3.29412		DCA-3S	0	0		DCA-3S	-0.0204127	0.0400037
TBAs	-0.14111	0.985624		TBAs	0.351254	1.84077		TBAs	0.791477	3.61788		GDCA-3S	0.511674	1.86553		GDCA-3S	2.21973	9.18721		GDCA-3S	3.68749	2.37911		GDCA-3S	0.279888	0.435791		GDCA-3S	0	0		GDCA-3S	0	0
unsulfated BAs/TBAs	0.0548472	0.98706		unsulfated BAs/TBAs	-0.00104692	4.53448		unsulfated BAs/TBAs	0.0105945	14.2685		TDCA-3S	1.30976	5.49292		TDCA-3S	0.0361479	0.0487941		TDCA-3S	0	3.32351		TDCA-3S	-0.0788199	0.115016		TDCA-3S	0	0		TDCA-3S	0	0
sulfated BAs/TBAs	-0.148264	0.98706		sulfated BAs/TBAs	0.958302	4.53448		sulfated BAs/TBAs	-3.9227	14.2685		unsulfated BAs	-0.152977	0.482907		unsulfated BAs	0.900141	2.54378		unsulfated BAs	2.20578	5.81355		unsulfated BAs	-0.0707776	0.289718		unsulfated BAs	1.3452	14.4073		unsulfated BAs	0.713699	3.63771
unconj-PBAs%	-0.720718	5.19315		unconj-PBAs%	-0.536603	4.19641		unconj-PBAs%	0.271887	0.814462		sulfated BAs	0.107439	0.447266		sulfated BAs	1.30732	4.47751		sulfated BAs	0.391939	0.926758		sulfated BAs	0.238969	0.819503		sulfated BAs	3.63345	8.74392		sulfated BAs	-0.161952	0.44668
unconj-SBAs%	-0.592737	6.28042		unconj-SBAs%	1.01292	4.48451		unconj-SBAs%	-0.252642	1.20261		TBAs	0.0596818	0.28059		TBAs	0.911237	2.596		TBAs	2.16703	5.7464		TBAs	-0.0592278	0.247762		TBAs	1.34664	14.452		TBAs	0.707867	3.62318
conj-PBAs%	0.52899	2.70347		conj-PBAs%	0.426878	3.76635		conj-PBAs%	1.26107	4.83671		unsulfated BAs/TBAs	-0.0148911	0.0525267		unsulfated BAs/TBAs	-0.0186257	4.62746		unsulfated BAs/TBAs	0.0673135	6.37066		unsulfated BAs/TBAs	-0.0147307	0.910092		unsulfated BAs/TBAs	-0.00162717	5.84416		unsulfated BAs/TBAs	0.00456245	3.17387
conj-SBAs%	0.12337	0.564957		conj-SBAs%	0.223411	0.796708		conj-SBAs%	1.33304	4.49024		sulfated BAs/TBAs	0.00393687	0.0525267		sulfated BAs/TBAs	0.68896	4.62746		sulfated BAs/TBAs	-2.39166	6.37066		sulfated BAs/TBAs	0.314592	0.910092		sulfated BAs/TBAs	2.37284	5.84416		sulfated BAs/TBAs	-0.667212	3.17387
sulfated unconj-PBAs	-0.435036	1.16528		sulfated unconj-PBAs	2.64494	5.78523		sulfated unconj-PBAs	0	0		unconj-PBAs	0.128489	0.342112		unconj-PBAs	1.13151	3.55549		unconj-PBAs	1.72849	3.64898		unconj-PBAs	0.41489	0.536431		unconj-PBAs	1.66235	14.4049		unconj-PBAs	1.68716	4.99838
sulfated unconj-SBAs	0.459339	1.34603		sulfated unconj-SBAs	-0.93634	8.56414		sulfated unconj-SBAs	0	1.56897		unconj-SBAs	-0.413538	1.0723		unconj-SBAs	0.751278	1.70126		unconj-SBAs	2.22255	5.05638		unconj-SBAs	-0.188722	1.59134		unconj-SBAs	1.33038	13.928		unconj-SBAs	0.282917	1.38949
sulfated conj-PBAs	-0.453441	4.46659		sulfated conj-PBAs	1.97329	13.9845		sulfated conj-PBAs	-3.1914	13.1128		conj-PBAs	0.866147	6.16618		conj-PBAs	1.75825	6.52897		conj-PBAs	2.94961	3.95627		conj-PBAs	-0.53167	1.21496		conj-PBAs	0.414124	4.69089		conj-PBAs	-0.422868	1.49847
sulfated conj-SBAs	-0.394624	1.97886		sulfated conj-SBAs	1.29071	5.96095		sulfated conj-SBAs	-1.45679	5.63959		conj-SBAs	-0.154682	0.654781		conj-SBAs	0.0700723	0.211933		conj-SBAs	2.50135	4.01744		conj-SBAs	-0.025599	0.0492871		conj-SBAs	1.15166	1.96477		conj-SBAs	0.362508	0.344279
unconj-PBAs%	-0.685443	5.66925		unconj-PBAs%	-0.849324	16.8598		unconj-PBAs%	-0.308386	2.48128		sulfated unconj-PBA	-0.105413	0.198253		unconj-PBA-3S	2.23147	3.158		unconj-PBA-3S	0	0		sulfated unconj-PBA	-0.391803	0.84267		sulfated unconj-PBA	4.16107	7.6558		sulfated unconj-PBA	2.09039	6.13645
unconj-SBAs%	-0.327276	5.00508		unconj-SBAs%	0.611528	12.3752		unconj-SBAs%	-0.708018	6.04281		sulfated unconj-SBA	0.215846	0.649221		unconj-SBA-3S	0.688363	2.4515		unconj-SBA-3S	2.23277	3.82098		sulfated unconj-SBA	0.385147	1.39674		sulfated unconj-SBA	2.76861	10.5502		sulfated unconj-SBA	-0.0133023	0.0260464
conj-PBAs%	0.545769	8.92661		conj-PBAs%	0.501514	1.0149		conj-PBAs%	0.429981	3.76875		sulfated conj-PBAs	-0.213748	1.29872		conj-PBA-3S	0.649	2.46017		conj-PBA-3S	-0.785439	3.34523		sulfated conj-PBAs	-1.01635	2.3721		sulfated conj-PBAs	0	33.2139		sulfated conj-PBAs	-1.94467	9.4615
conj-SBAs%	0.395068	7.47447		conj-SBAs%	-0.000446719	0.00161808		conj-SBAs%	0.371777	3.15162		sulfated conj-SBAs	0.200958	0.738323		conj-SBA-3S	0.439328	0.897971		conj-SBA-3S	3.9897	2.54082		sulfated conj-SBAs	-0.238151	0.563967		sulfated conj-SBAs	0	0		sulfated conj-SBAs	#NUM!	1.56897
unconj-PBA-3S%	-0.343622	0.976945		unconj-PBA-3S%	2.24824	5.06707		sulfated unconj-PBAs%	0	0		unconj-PBAs%	0.301391	1.08818		unconj-PBAs%	0.44669	4.55065		unconj-PBAs%	-0.351262	2.35252		unconj-PBAs	-0.279802	0.492792		unconj-PBAs	0.700162	8.01324		unconj-PBAs	-0.200631	0.466815
unconj-SBA-3S%	0.596762	2.34221		unconj-SBA-3S%	-1.03887	7.24345		sulfated unconj-SBAs%	0	1.56897		unconj-SBAs%	-0.230871	0.700086		unconj-SBAs%	-0.288379	5.24728		unconj-SBAs%	-0.00301465	0.014596		unconj-SBAs	-0.421686	0.903702		unconj-SBAs	-0.034961	0.189804		unconj-SBAs	-0.485021	2.38864
conj-PBA-3S%	-0.402468	3.83193		conj-PBA-3S%	1.77118	6.88466		sulfated conj-PBAs%	-4.19681	13.8659		conj-PBAs%	0.769378	7.34416		conj-PBAs%	1.30417	4.93056		conj-PBAs%	1.23876	2.26668		conj-PBAs	-0.834828	2.19637		conj-PBAs	0	33.2139		conj-PBAs	-0.868779	1.34354
conj-SBA-3S%	-0.0978045	0.504105		conj-SBA-3S%	1.07612	4.24932		sulfated conj-SBAs%	-2.31934	8.59065		conj-SBAs%	-0.219712	0.937368		conj-SBAs%	-1.49	2.25254		conj-SBAs%	0.610168	1.26713		conj-SBAs	-0.401561	1.00878		conj-SBAs	4.8595	6.54852		conj-SBAs	0	6.42434
12-OH-BAs	0.180389	1.0317		CA%	-1.08353	16.2956		CA%	-0.300885	1.78114		sulfated unconj-PBA%	0.178136	0.521763		sulfated unconj-PBA%	1.70847	7.96892		sulfated unconj-PBA%	0	0		unsulfated T-conj BAs/unsulfated G-conj BAs	-0.417109	0.948624		unsulfated T-conj BAs/unsulfated G-conj BAs	0.657872	5.8585		unsulfated T-conj BAs/unsulfated G-conj BAs	0.133614	0.195801
sulfated 12-OH-BAs	0.103752	0.329186		GCA%	-0.51938	2.01346		GCA%	0.00441857	0.0221681		sulfated unconj-SBA%	0.32102	1.56651		sulfated unconj-SBA%	-0.726569	3.50278		sulfated unconj-SBA%	-0.113734	0.33202		conj BAs%	-0.0244782	0.0511259		conj BAs%	-0.879952	6.22532		conj BAs%	-0.554075	1.48868
sulfated non12-OH-BAs	-0.540888	4.18509		TCA%	0.368666	0.641949		TCA%	0.326755	2.03192		sulfated conj-PBAs%	-0.217973	1.72678		sulfated conj-PBAs%	0.209142	0.603849		sulfated conj-PBAs%	-3.52129	6.79966		unconj BAs%	0.000710108	0.0960685		unconj BAs%	0.00257628	6.14785		unconj BAs%	0.0100043	0.888455
12-OH-BAs%	0.392724	7.59089		CDCA%	0.202445	1.04742		CDCA%	-0.886366	6.41384		sulfated conj-SBAs%	0.0721056	0.630391		sulfated conj-SBAs%	0.128408	0.179431		sulfated conj-SBAs%	1.04121	1.08468		CA group/TBA	1.04012	1.96796		CA group/TBA				CA group/TBA
non12-OH-BAs%	-0.129171	1.45821		GCDCA%	0.642939	5.18029		GCDCA%	-0.972324	0.57781		12-OH-BAs	-0.256928	0.734468		CA%	1.06087	6.23667		CA%	-1.3842	6.50823		CDCA group/TBA	-0.411539	1.15951		CDCA group/TBA				CDCA group/TBA
sulfated 12-OH-BAs%	0.332824	1.63814		TCDCA%	1.21732	2.03813		TCDCA%	1.41674	6.94977		sulfated 12-OH-BAs	0.537104	2.03113		GCA%	1.82552	5.56086		GCA%	0.6502	0.903324		MCA group/TBA	0.172251	0.491282		MCA group/TBA				MCA group/TBA
sulfated non12-OH-BAs%	-0.29702	2.73386		α-MCA%	-1.18427	9.32037		α-MCA%	-0.608731	4.66425		sulfated non12-OH-BAs	-0.253361	1.76772		TCA%	1.37833	6.09639		TCA%	1.39038	3.33551		UDCA group/TBA	-1.13667	3.82878		UDCA group/TBA				UDCA group/TBA
CA%	-0.319721	1.42184		β-MCA%	-1.13336	8.2324		β-MCA%	-0.134452	0.643021		12-OH-BAs%	-0.0903422	0.29585		CDCA%	-1.86405	8.17762		CDCA%	1.21966	4.85278		HCA group/TBA	0.121062	0.42411		HCA group/TBA				HCA group/TBA
GCA%	0.63333	6.23795		T-α-MCA%	0.796205	1.83299		T-α-MCA%	0.666143	3.96878		sulfated 12-OH-BAs%	0.333634	3.57917		GCDCA%	-0.71883	1.01597		GCDCA%	1.34269	1.81437		HDCA group/TBA	-0.0366471	0.186921		HDCA group/TBA				HDCA group/TBA
TCA%	0.841333	5.58475		T-β-MCA%	0.565411	1.11187		T-β-MCA%	0.476592	5.29381		sulfated non12-OH-BAs%	-0.247892	7.51615		TCDCA%	-0.829001	1.60125		TCDCA%	1.45147	2.12581		LCA group/TBA	0.114723	0.80136		LCA group/TBA				LCA group/TBA
CDCA%	-0.809601	6.06613		HCA%	-1.36379	17.4315		HCA%	0.880508	0.976864		CA%	0.303146	1.05511		α-MCA%	0.592912	4.11068		α-MCA%	-0.317592	0.853394		DCA group/TBA	0.0876229	0.775794		DCA group/TBA				DCA group/TBA
GCDCA%	0.516532	7.19312		GHCA%	-0.119668	0.483771		GHCA%	-2.08125	21.1577		GCA%	0.3691	1.75456		β-MCA%	-3.03768	7.63414		β-MCA%	0.122032	0.367306		others BAs/TBA	-0.304031	2.61971		others BAs/TBA				others BAs/TBA
TCDCA%	0.484156	3.85657		THCA%	0.852491	0.714344		THCA%	0	1.56897		TCA%	0.458666	2.20137		T-α-MCA%	0.36759	0.530654		T-α-MCA%	0.00562259	0.00655875		12-OH-BAs	0.142014	0.414053		12-OH-BAs	0.924484	6.80199
α-MCA%	1.79322	2.67684		HDCA%	0.673518	2.84549		HDCA%	0	0		CDCA%	-0.120345	0.206269		T-β-MCA%	-1.69209	1.61086		T-β-MCA%	1.09316	2.75609		non12-OH-BAs	-0.296734	2.41054		non12-OH-BAs	1.39415	14.248		12-OH-BAs	0.731982	2.97712
β-MCA%	0	0		GHDCA%	0	0		GHDCA%	0	2.75542		GCDCA%	0.0196855	0.0596869		HCA%	-1.88177	6.9799		HCA%	0.0638005	0.120927		12-OH-BAs/non12-OH-BAs	0.0894873	0.367346		12-OH-BAs/non12-OH-BAs	-0.417226	4.28999		non12-OH-BAs	0.709282	3.58108
T-α-MCA%	1.01013	6.40639		THDCA%	1.28639	2.32482		THDCA%	-1.2492	18.4088		TCDCA%	0.25413	0.898026		HDCA%	-3.00938	4.87777		HDCA%	-0.501788	2.79227		unconj-PBA/s%	-0.0489494	0.834591		unconj-PBAs%	-0.0179965	1.89396		12-OH-BAs/non12-OH-BAs	-0.169628	0.88692
T-β-MCA%	0	1.72379		UDCA%	-1.24284	9.54922		UDCA%	-0.164283	1.42138		α-MCA%	0.621501	5.45957		GHCA%	0	1.56897		GHCA%	1.60645	2.43931		unconj-SBAs%	-0.195578	0.412719		unconj-SBAs%	-0.956958	6.48985		unconj-PBA/s%	-0.392347	6.15403
HCA%	-0.725589	5.00365		GUDCA%	-0.61118	0.982081		GUDCA%	0.385696	0.558017		β-MCA%	0.286481	0.958002		GHDCA%	0	2.76179		GHDCA%	1.0832	1.69149		conj-PBAs%	0.329179	0.740419		conj-PBAs%	-0.291115	0.593556		unconj-SBAs%	-0.800663	3.64716
GHCA%	-0.299435	1.1105		TUDCA%	-2.08281	4.84675		TUDCA%	1.49437	14.607		T-α-MCA%	1.51423	10.0401		THCA%	0	0		THCA%	1.16599	1.88311		conj-SBAs%	-0.21707	0.342332		conj-SBAs%	2.89436	5.54988		conj-PBAs%	0.270986	0.247306
THCA%	0.0978242	0.457306		LCA%	1.35008	7.70261		LCA%	-0.108692	0.558511		T-β-MCA%	0	0		THDCA%	1.01551	2.04791		THDCA%	0.797421	1.26198		sulfated unconj-PBAs%	0.436056	1.34526		sulfated unconj-PBAs%	1.5038	5.52558		conj-SBAs%	1.39691	4.4852
HDCA%	-0.411514	1.80151		GLCA%	0	0		GLCA%	0	0		HCA%	0.220255	0.737187		UDCA%	-3.73468	7.95373		UDCA%	0.0543848	0.11378		sulfated unconj-SBAs%	-0.739373	2.14349		sulfated unconj-SBAs%	0	22.5384		sulfated unconj-PBAs%	-0.470455	1.43134
GHDCA%	1.77765	2.17335		TLCA%	0.406022	0.731396		TLCA%	0	1.56897		HDCA%	0.838867	4.73828		GUDCA%	-2.13727	4.70102		GUDCA%	-1.40776	9.2133		sulfated conj-PBAs%	-0.149153	0.336255		sulfated conj-PBAs%	0	0		sulfated unconj-SBAs%	-2.58806	10.7474
THDCA%	0.0628989	0.19003		7-ketoLCA%	1.3912	8.57406		7-ketoLCA%	-0.168647	0.282291		GHCA%	-0.346604	0.996768		TUDCA%	1.40801	2.09377		TUDCA%	-0.960989	1.31062		sulfated conj-SBAs%	0.0792712	0.12813		sulfated conj-SBAs%	-0.684168	3.99586		sulfated conj-PBAs%	#NUM!	1.56897
UDCA%	-0.724385	6.78807		12-ketoLCA%	-3.43289	4.0367		12-ketoLCA%	-0.571755	1.24429		GHDCA%	0.240492	0.299291		LCA%	-3.35514	6.96564		LCA%	-1.02764	1.43596		unsulfated G-conj	-0.421686	0.903702		unsulfated G-conj BAs	-0.034961	0.189804		sulfated conj-SBAs%	-0.436071	0.979513
GUDCA%	-0.373497	1.83088		DCA%	-1.84514	16.7986		DCA%	-0.439146	1.42302		THCA%	0	1.5485		GLCA%	0	0		GLCA%	0.413977	0.345685		unsulfated T-conj BAs	-0.279802	0.492792		unsulfated T-conj BAs	0.700162	8.01324		unsulfated G-conj BAs	-0.485021	2.38864
TUDCA%	0.0626963	0.151054		GDCA%	-0.330996	0.633459		GDCA%	-0.64031	1.5389		THDCA%	1.52928	0.958711		TLCA%	0	0		TLCA%	0	1.56897		sulfated G-conj BAs	-0.282236	0.703239		sulfated G-conj BAs	0	0		unsulfated T-conj BAs	-0.200631	0.466815
LCA%	-0.00438996	0.0211219		TDCA%	-0.326721	0.600454		TDCA%	-0.677037	4.02254		UDCA%	0.438928	3.25325		7-ketoLCA%	-2.06023	1.07717		7-ketoLCA%	-0.202	0.754391		sulfated T-conj BAs	-0.834828	2.19637		sulfated T-conj BAs	0	33.2139		sulfated G-conj BAs	-3.37921	12.1593
GLCA%	0.42091	1.68442		23-norDCA%	-0.0190202	0.0566772		23-norDCA%	3.48705	8.49303		GUDCA%	-0.458376	1.78132		12-ketoLCA%	0	0		12-ketoLCA%	-0.230502	0.539861		unsulfated G-conj BAs%	-0.0815104	0.153448		unsulfated G-conj BAs%	-1.37269	9.33764		sulfated T-conj BAs	-0.868779	1.34354
TLCA%	1.15769	2.72425		7-ketoDCA%	-3.03559	8.99497		7-ketoDCA%	-0.484126	2.27187		TUDCA%	-0.455413	0.687514		DCA%	-3.82461	8.67994		DCA%	0.765681	1.36592		unsulfated T-conj BAs%	0.0792712	0.12813		unsulfated T-conj BAs%	-0.684168	3.99586		unsulfated G-conj BAs%	-1.26921	4.8614
7-ketoLCA%	-0.420057	2.22984		3-ketoCA%	-0.0550457	0.298888		3-ketoCA%	-0.453945	1.14123		LCA%	0.846236	6.31314		GDCA%	0	0		GDCA%	0	1.56897		sulfated G-conj BAs%	-0.826659	1.78686		sulfated G-conj BAs%	0	22.5384		unsulfated T-conj BAs%	-0.436071	0.979513
12-ketoLCA%	0.645148	3.49875		allo-LCA%	1.66395	3.16735		allo-LCA%	-3.60613	14.5687		GLCA%	0	1.72379		TDCA%	1.84714	2.70288		TDCA%	0	6.53713		sulfated T-conj BAs	-0.945767	2.045		sulfated T-conj BAs	0	22.5384		sulfated G-conj BAs%	-1.62239	2.22632
DCA%	0.232453	1.60856		iso-LCA%	0.830158	2.57886		iso-LCA%	-1.89993	11.7888		TLCA%	0	0		23-norDCA%	0	0		23-norDCA%	0	0		PBAs	0.348198	0.474206		PBAs	1.62613	14.817		sulfated T-conj BAs	-1.62239	2.22632
GDCA%	0.705611	8.80897		6-ketoLCA%	0.397275	2.22458		6-ketoLCA%	-0.552787	1.09149		7-ketoLCA%	-0.167066	0.291112		7-ketoDCA%	0	15.956		7-ketoDCA%	-1.83302	3.74433		SBAs	-0.166171	1.39008		SBAs	1.33048	13.945		PBAs	1.57015	4.89271
TDCA%	0.472271	4.20762		β-HDCA%	-0.550235	2.3003		β-HDCA%	-0.939895	3.6184		12-ketoLCA%	0.226948	0.392156		3-ketoCA%	1.44278	6.17777		3-ketoCA%	-0.692932	4.24477		non12-OH-BAs	-0.287542	2.41423		non12-OH-BAs	1.40585	14.3949		SBAs	0.277094	1.36836
23-norDCA%	0.458601	3.24642		β-UDCA%	-2.48858	3.78581		β-UDCA%	-1.22624	6.76179		DCA%	0.128392	0.293007		dehydroLCA%	-2.34076	7.01608		dehydroLCA%	-1.90583	8.19653		non12-OH-PBAs	-0.557397	1.17116		non12-OH-PBAs	1.69783	14.8225		non12-OH-BAs	0.711985	3.59186
7-ketoDCA%	0	0		6,7-diketoLCA%	1.65708	10.8742		6,7-diketoLCA%	0	6.59254		GDCA%	0.436305	1.98359		allo-LCA%	-0.395765	0.584819		allo-LCA%	-1.27738	1.83704		non12-OH-SBAs	-0.224045	1.85561		non12-OH-SBAs	1.66454	15.4752		non12-OH-PBAs	1.60697	5.47992
3-ketoCA%	-0.50744	0.639809		12-ketoCDCA%	1.20124	15.3851		12-ketoCDCA%	-1.31994	8.16824		TDCA%	0	0		iso-LCA%	-3.24914	5.44492		iso-LCA%	-1.32398	2.4422		non12-OH-BAs/12-OH-BAs	-0.0931339	0.6322		non12-OH-BAs/12-OH-BAs	0.560451	5.43717		non12-OH-SBAs	0.231441	0.855737
allo-LCA%	0.865172	1.44124		ω-MCA%	-0.708377	3.91264		ω-MCA%	-0.294723	1.80594		23-norDCA%	0	0		6-ketoLCA%	-2.58418	5.53298		6-ketoLCA%	-0.75762	3.95006		non12-OH-PBAs/12-OH-PBAs	-1.51146	2.67747		non12-OH-PBAs/12-OH-PBAs	2.13343	10.4801		non12-OH-BAs/12-OH-BAs	-0.1262	0.337495
iso-LCA%	-0.335326	1.54417		T-ω-MCA%	0.963206	2.41165		T-ω-MCA%	0.514524	3.77201		7-ketoDCA%	0.170564	0.473625		β-HDCA%	-2.76746	4.05387		β-HDCA%	0.688084	1.93162		non12-OH-SBAs/12-OH-SBAs	0.0135169	0.0730855		non12-OH-SBAs/12-OH-SBAs	0.972983	9.05126		non12-OH-PBAs/12-OH-PBAs	0.356446	0.853626
6-ketoLCA%	-0.0300429	0.157369		muroCA%	-1.6635	8.58519		muroCA%	-1.51534	14.124		3-ketoCA%	0	0		β-UDCA%	-7.02724	6.01877		β-UDCA%	0.40986	0.577213		T-conj BAs/G-conj BAs	-0.49616	1.31746		T-conj BAs/G-conj BAs	0.693535	6.29089		non12-OH-SBAs/12-OH-SBAs	-0.346733	0.937508
β-HDCA%	0.291503	0.799519		DHCA%	0	0		DHCA%	0	0		dehydroLCA%	0	0		7,12-diketoLCA%	0.563501	3.12617		7,12-diketoLCA%	0.499262	0.475709		unconj-BAs/conj-BAs	0.224504	0.715563		unconj-BAs/conj-BAs	0.831397	7.19916		T-conj BAs/G-conj BAs	1.0024	2.20921
β-UDCA%	-1.1124	6.53476		UCA%	-4.73001	13.8755		UCA%	0.244307	0.719378		allo-LCA%	0	0		6,7-diketoLCA%	0	0		6,7-diketoLCA%	0	4.03171		unconj-BA/T-conj BAs	-0.468906	0.966193		unconj-BAs/T-conj BAs	0.534764	4.0295		unconj-BAs/conj-BAs	0.920022	1.95625
6,7-diketoLCA%	0	0		ACA%	1.38975	1.94088		ACA%	-6.44664	11.5491		iso-LCA%	0	0		12-ketoCDCA%	-3.07861	6.28749		12-ketoCDCA%	0.535902	1.61562		unconj-BAs/G-conj BAs	0.2404	0.730089		unconj-BAs/G-conj BAs	1.31856	10.2303		unconj-BAs/T-conj BAs	0.89056	1.64814
12-ketoCDCA%	0	0		CA-3S%	0	5.9363		CA-3S%	0	0		6-ketoLCA%	0	0		ω-MCA%	-2.39592	8.76749		ω-MCA%	-0.0349514	0.0625495		(unconj-BA+slufated unconj BAs)/(unsulfated-conj BAs+sulfated-conj BAs)	0.30246	0.958759		(unconj-BA+slufated unconj BAs)/(unsulfated-conj BAs+sulfated-conj BAs)	0.795359	6.91275		unconj-BAs/G-conj BAs	0.821222	6.00679
ω-MCA%	-0.170967	0.874716		GCA-3S%	0	0		GCA-3S%	0	0		β-HDCA%	0	0		T-ω-MCA%	-1.95406	1.90147		T-ω-MCA%	1.66522	3.09845		(unconj-BAs+slufated unconj BAs)/(unsulfate T-conj BAs+sulfated T-conj BAs)	0.465913	1.79464		(unconj-BAs+slufated unconj BAs)/(unsulfate T-conj BAs+sulfated T-conj BAs)	0.797994	3.78671		(unconj-BA+slufated unconj BAs)/(unsulfated-conj BAs+sulfated-conj BAs)	1.03718	2.24154
T-ω-MCA%	0	3.26918		TCA-3S%	-4.03155	8.43175		TCA-3S%	-4.19681	13.8659		β-UDCA%	-1.87971	5.88499		muroCA%	-1.8338	4.97702		muroCA%	0.187421	0.467255		(unconj-BA+slufate unconj-BAs)/(unsulfate G-conj BAs+sulfate G-conj BAs)	-0.215441	0.453815		(unconj-BA+slufate unconj-BAs)/(unsulfate G-conj BAs+sulfate G-conj BAs)	0.252447	0.695758		(unconj-BAs+slufated unconj BAs)/(unsulfate T-conj BAs+sulfated T-conj BAs)	2.01224	2.97012
muroCA%	0	0		CDCA-3S%	1.68118	3.80466		CDCA-3S%	0	0		7,12-diketoLCA%	-1.30194	2.17982		DHCA%	2.50565	6.57711		DHCA%	0	0		residue G-conj BAs in TBAs	-0.0781074	0.154298		residue G-conj BAs%	-1.37269	9.33764		(unconj-BA+slufate unconj-BAs)/(unsulfate G-conj BAs+sulfate G-conj BAs)	0.634396	3.86241
DHCA%	0	0		GCDCA-3S%	0	7.69316		GCDCA-3S%	0	0		6,7-diketoLCA%	0	2.19357		UCA%	-2.10599	5.75671		UCA%	1.71248	1.59296		residue T-conj BAs in TBAs	0.0200595	0.0327624		residue T-conj BAs%	-0.649428	3.77845		residual G-conj BAs%	-1.82958	10.4368
UCA%	0	0		TCDCA-3S%	2.10552	6.71626		TCDCA-3S%	0	0		12-ketoCDCA%	0	0		ACA%	#NUM!	7.30288		ACA%	0.0871295	0.236237		DCA group/CA group	0.5665	1.34271		DCA group/CA group	1.25963	10.2225		residual T-conj BAs%	-0.45838	1.04437
ACA%	0	0		UDCA-3S%	-1.5582	8.35028		UDCA-3S%	0	1.56897		ω-MCA%	0.317247	1.28606		GDHCA%	0	4.21466		GDHCA%	-2.62035	5.99777		LCA group/CDCA group	-0.0756923	0.167383		LCA group/CDCA group	1.01368	8.62895		DCA group/CA group	-0.290054	0.279403
CA-3S%	0	0		GUDCA-3S%	0	0		GUDCA-3S%	0	0		T-ω-MCA%	0	0		TDHCA%	0	9.60619		TDHCA%	0	0		7-keto DCA/CA	0	0		7-keto DCA/CA	0	0		LCA group/CDCA group	-1.86448	5.58117
GCA-3S%	0.00416722	0.0146156		TUDCA-3S%	0.883289	2.76049		TUDCA-3S%	0	1.56897		muroCA%	0	0		CA-3S%	1.72153	7.71403		CA-3S%	0	0		12-keto CDCA/CA	0	0		12-keto CDCA/CA	2.87137	17.5697		7-keto DCA/CA	1.57686	3.33085
TCA-3S%	0.597097	2.06426		LCA-3S%	0	5.83311		LCA-3S%	0	0		DHCA%	0.93689	5.94298		GCA-3S%	2.73908	7.99169		GCA-3S%	-2.22268	2.55442		3-keto CA/CA	0	0		3-keto CA/CA	0	0		12-keto CDCA/CA	1.00061	0.752619
CDCA-3S%	-0.343622	0.976945		GLCA-3S%	0	0		GLCA-3S%	0	0		UCA%	-0.413328	1.03601		TCA-3S%	0.653327	1.92169		TCA-3S%	-3.60601	6.63366		7-keto LCA/CDCA	-0.368462	1.4599		7-keto LCA/CDCA	0	6.82261		3-keto CA/CA	0.926894	1.77321
GCDCA-3S%	-0.433378	4.29531		TLCA-3S%	1.51272	5.11245		TLCA-3S%	-1.4866	3.58698		ACA%	0	0		CDCA-3S%	1.43716	7.24683		CDCA-3S%	0	0		dehydroLCA/LCA	-0.933898	2.96757		dehydroLCA/LCA	-0.461892	3.12231		7-keto LCA/CDCA	0	0
TCDCA-3S%	-0.123454	0.567819		DCA-3S%	0	0		DCA-3S%	0	0		GDHCA%	0	0		GCDCA-3S%	2.46567	3.28207		GCDCA-3S%	0	3.81289		isoLCA/LCA	-0.0238691	0.113522		isoLCA/LCA	-0.159838	1.6575		dehydroLCA/LCA	-0.461892	3.12231
UDCA-3S%	-1.04911	5.55		GDCA-3S%	0	1.56897		GDCA-3S%	0	0		TDHCA%	0	0		TCDCA-3S%	2.20071	3.92223		TCDCA-3S%	0	0		UDCA/CDCA	-0.895159	3.91508		UDCA/CDCA	0	0		isoLCA/LCA	0.174755	1.78953
GUDCA-3S%	-1.20572	7.31129		TDCA-3S%	0.0847887	0.25		TDCA-3S%	0	6.49898		CA-3S%	0.596418	1.43746		UDCA-3S%	-2.68251	5.81111		UDCA-3S%	-0.952669	2.44625		UCA/CA	0	0		UCA/CA	-1.26615	2.71491		UCA/CA	-0.49419	0.463948
TUDCA-3S%	-0.588648	3.63752		CA group/TBA	-0.714438	11.3583		CA group/TBA	0.0939363	0.615673		GCA-3S%	-0.0115812	0.0599947		GUDCA-3S%	0	0		GUDCA-3S%	0	0		CA%	1.16042	2.02424		CA%	-1.87324	8.69078		CA%	0.665669	2.02226
LCA-3S%	0.807323	2.90672		CDCA group/TBA	0.602134	2.45071		CDCA group/TBA	-0.464556	2.98528		TCA-3S%	0.230824	0.726562		TUDCA-3S%	0	8.45679		TUDCA-3S%	0	0		GCA%	-0.20031	0.439235		GCA%	-1.49732	8.67244		GCA%	-0.823585	4.29894
GLCA-3S%	-0.222929	1.16437		MCA group/TBA	-0.707488	4.06127		MCA group/TBA	0.260235	3.34611		CDCA-3S%	0.173457	0.507318		LCA-3S%	0	1.56897		LCA-3S%	0	0		TCA%	-0.140052	0.211127		TCA%	-1.52825	7.5021		TCA%	-1.40322	4.09397
TLCA-3S%	0.0901057	0.289245		UDCA group/TBA	-0.992901	4.48058		UDCA group/TBA	0.465653	7.05262		GCDCA-3S%	-0.236029	1.90352		GLCA-3S%	0	0		GLCA-3S%	0	0		CDCA%	-0.447784	1.06341		CDCA%	0.378829	1.43537		CDCA%	0.229126	0.829764
DCA-3S%	0.731236	3.24926		HCA group/TBA	-1.01539	7.95155		HCA group/TBA	0.938292	1.09996		TCDCA-3S%	0.0888628	0.425619		TLCA-3S%	0	0		TLCA-3S%	0	0		GCDCA%	-0.105968	0.174695		GCDCA%	-1.30974	8.60267		GCDCA%	-1.21637	5.18748
GDCA-3S%	0.319486	1.53371		HDCA group/TBA	0.223238	0.782562		HDCA group/TBA	-1.61917	27.6404		UDCA-3S%	-0.276339	1.13925		DCA-3S%	-0.0434428	0.12478		DCA-3S%	0.312027	0.672931		TCDCA%	-0.252917	0.325721		TCDCA%	0.274892	1.61096		TCDCA%	-1.57605	9.03125
TDCA-3S%	0.53193	2.35017		LCA group/TBA	1.63513	9.56876		LCA group/TBA	-0.169059	1.03657		GUDCA-3S%	-0.881384	4.86261		GDCA-3S%	2.45716	8.85629		GDCA-3S%	0.699924	0.651947		α-MCA%	0.351945	1.41829		α-MCA%	1.11642	10.7569		α-MCA%	0.272741	2.34809
CA group/TBA	0.327726	3.70894		DCA group/TBA	-1.36321	11.3852		DCA group/TBA	-0.49452	1.82789		TUDCA-3S%	-0.44119	1.67055		TDCA-3S%	-0.347085	0.375478		TDCA-3S%	0	3.99973		β-MCA%	0.0379088	0.0399097		β-MCA%	0.113982	0.46645		β-MCA%	1.21687	6.41182
CDCA group/TBA	0.0589683	0.596951		others BAs/TBA	1.38224	5.50517		others BAs/TBA	0.0249968	0.249836		LCA-3S%	0.384186	0.950372		CA group/TBA	1.19498	8.23674		CA group/TBA	-1.6758	6.9985		T-α-MCA%	2.03275	1.37981		T-α-MCA%	0	0		T-α-MCA%	-1.50933	1.22778
MCA group/TBA	1.14991	7.64619		G-conj BAs/T-conj BAs	-0.121868	0.961117		G-conj BAs/T-conj BAs	-1.86237	11.9762		GLCA-3S%	-0.214918	1.15095		CDCA group/TBA	0.476086	2.11065		CDCA group/TBA	1.32858	2.40111		T-β-MCA%	1.98852	7.77105		T-β-MCA%	0.674398	0.687238		T-β-MCA%	-0.524492	1.95435
UDCA group/TBA	-0.70507	6.24286		G-conj-BAs%	-0.120529	0.50559		G-conj-BAs%	-1.61144	19.428		TLCA-3S%	0.189639	0.917278		MCA group/TBA	-1.28715	5.89242		MCA group/TBA	-0.0478928	0.206827		HCA%	0.156554	0.447355		HCA%	0.947371	7.10548		HCA%	-0.378336	3.29321
HCA group/TBA	-0.242742	1.90683		T-conj-BAs%	0.156287	0.63605		T-conj-BAs%	0.373296	5.1491		DCA-3S%	0.999032	6.23958		UDCA group/TBA	-2.07284	6.57827		UDCA group/TBA	-0.173711	0.51535		HDCA%	0.213029	0.941358		HDCA%	-1.12198	8.72697		HDCA%	-1.24406	3.17141
HDCA group/TBA	-0.316219	1.70233		PBAs	-0.465149	4.05356		PBAs	0.912795	3.88169		GDCA-3S%	0.307008	3.00397		HCA group/TBA	-1.94631	7.21126		HCA group/TBA	0.520129	2.07083		GHCA%	0.875168	1.40944		GHCA%	0	0		GHCA%	0	0
LCA group/TBA	-0.129581	0.62514		SBAs	1.05832	4.74059		SBAs	0.72073	3.14074		TDCA-3S%	0.965164	8.97165		HDCA group/TBA	-2.27255	4.7538		HDCA group/TBA	0.285493	0.842002		GHDCA%	0.0837537	0.0805931		GHDCA%	-2.5088	8.10198		GHDCA%	0	2.62211
DCA group/TBA	0.399565	4.65092		non12-OH-BAs	0.732654	3.75757		non12-OH-BAs	0.849107	3.52		CA group/TBA	-0.241347	2.00826		LCA group/TBA	-3.33049	6.9525		LCA group/TBA	-0.994634	1.43367		THCA%	0.0572077	0.0988868		THCA%	0	1.56897		THCA%	0	0
others BAs/TBA	-0.864028	6.7148		non12-OH-PBAs	-0.217097	0.853857		non12-OH-PBAs	0.91051	3.7955		CDCA group/TBA	-0.150176	0.797174		DCA group/TBA	-1.63934	7.0442		DCA group/TBA	0.730032	1.41486		THDCA%	0.304257	0.526633		THDCA%	-0.521409	4.20775		THDCA%	0	0
unsulfated G-conj BAs%	0.493347	10.62		non12-OH-SBAs	1.17742	5.23161		non12-OH-SBAs	0.826221	3.15293		MCA group/TBA	-0.0631851	0.253893		others BAs/TBA	-0.36261	7.02405		others BAs/TBA	-0.149414	0.573197		UDCA%	-1.07429	3.28135		UDCA%	0	0		UDCA%	-0.262082	1.63609
unsulfated T-conj BAs%	0.502063	6.12802		non12-OH-BAs/12-OH-BAs	1.42626	11.5742		non12-OH-BAs/12-OH-BAs	0.166196	1.05182		UDCA group/TBA	1.01806	8.94586		unsulfated G-conj BAs	1.9669	6.06222		unsulfated G-conj BAs	2.45796	3.66874		GUDCA%	-0.998184	1.44976		GUDCA%	0	0		GUDCA%	0	0
sulfated G-conj BAs%	-0.194554	1.44318		non12-OH-PBAs/12-OH-PBAs	0.541476	2.28104		non12-OH-PBAs/12-OH-PBAs	0.251396	1.56151		HCA group/TBA	-0.129825	0.335339		unsulfated T-conj BAs	0.837332	3.5588		unsulfated T-conj BAs	3.37591	5.11584		TUDCA%	-0.396094	1.24913		TUDCA%	-0.669096	0.698408		TUDCA%	-1.13006	4.1443
sulfated T-conj BAs	0.0988951	0.36253		non12-OH-SBAs/12-OH-SBAs	1.854	16.5448		non12-OH-SBAs/12-OH-SBAs	0.648562	2.28842		HDCA group/TBA	0.201934	0.859675		sulfated G-conj BAs	2.46547	7.80102		sulfated G-conj BAs	1.21769	1.58079		LCA%	0.0768567	0.483885		LCA%	0.947183	11.8833		LCA%	-1.60673	7.08108
G-conj BAs/T-conj BAs	-0.195721	1.65312		T-conj BAs/G-conj BAs	0.216626	1.22914		T-conj BAs/G-conj BAs	2.12783	11.2477		LCA group/TBA	0.0576264	0.347369		sulfated T-conj BAs	0.838484	2.79425		sulfated T-conj BAs	-0.843371	3.88182		GLCA%	-0.649892	2.01671		GLCA%	0.0516696	0.19698		GLCA%	-1.11667	4.3493
G-conj-BAs%	0.215231	6.5818		sulfated G-conj BAs/unsulfated G-conj BAs	0	4.9667		sulfated G-conj BAs/unsulfated G-conj BAs	0	0		DCA group/TBA	-0.272777	5.46049		unsulfated G-conj BAs%	1.74597	5.46808		unsulfated G-conj BAs%	0.688988	1.21443		TLCA%	0.170958	0.266562		TLCA%	0.208243	0.147088		TLCA%	0	0
T-conj-BAs%	0.330848	3.50566		sulfated T-conj BAs/unsulfated T-conj BAs	1.23095	9.71881		sulfated T-conj BAs/unsulfated T-conj BAs	-4.3536	16.9853		others BAs/TBA	0.170964	0.705839		unsulfated T-conj BAs%	-0.686794	0.993972		unsulfated T-conj BAs%	1.07288	3.43053		7-ketoLCA%	-0.731715	2.22573		7-ketoLCA%	0	5.57158		7-ketoLCA%	1.63642	6.34424
PBAs	0.112176	0.530728		sulfated unconj BAs/unsulfated BAs	-0.409124	2.08364		sulfated unconj BAs/unsulfated BAs	0	1.56897		unsulfated G-conj BAs	-0.19609	0.540991		sulfated G-conj BAs%	2.63984	7.80385		sulfated G-conj BAs%	-1.18139	1.94309		12-ketoLCA%	0.117298	0.526581		12-ketoLCA%	-0.60806	7.08221		12-ketoLCA%	-0.985209	3.59627
SBAs	-0.354925	3.04939		CA-3S group/CA group	0.31508	0.626292		CA-3S group/CA group	-4.46854	13.9016		unsulfated T-conj BAs	0.038686	0.250295		sulfated T-conj BAs%	0.314958	0.696896		sulfated T-conj BAs%	-3.5827	6.62203		DCA%	0.0576113	0.466813		DCA%	-0.30511	3.00268		DCA%	-0.846517	4.15896
non12-OH-BAs	-0.285249	2.18479		CDCA-3S group/CDCA group	1.96887	7.34523		CDCA-3S group/CDCA group	0	0		sulfated G-conj BAs	-0.919085	3.70897		PBAs	1.24604	4.69823		PBAs	1.90041	4.57772		GDCA%	0.505318	0.889113		GDCA%	0	2.43508		GDCA%	0	3.74412
non12-OH-PBAs	0.0768063	0.332851		UDCA-3S group/UDCA group	0.216621	0.427737		UDCA-3S group/UDCA group	0	1.56897		sulfated T-conj BAs	0.0717068	0.439487		SBAs	0.827425	1.92938		SBAs	2.29166	6.05691		TDCA%	1.40501	2.32259		TDCA%	0	2.73014		TDCA%	0	0
non12-OH-SBAs	-0.736873	8.60862		DCA-3S group/DCA group	1.81579	6.88226		DCA-3S group/DCA group	0	6.98473		unsulfated G-conj BAs%	0	0		non12-OH-BAs	-0.628844	1.10459		non12-OH-BAs	2.4165	6.06016		23-norDCA%	0.719901	3.11499		23-norDCA%	0	0		23-norDCA%	0	0
non12-OH-BAs/12-OH-BAs	-0.89359	4.52855		LCA-3S group/LCA group	0.458779	2.58043		LCA-3S group/LCA group	-1.64667	4.35732		unsulfated T-conj BAs%	0	0		non12-OH-PBAs	-0.0068675	0.0135316		non12-OH-PBAs	2.27939	5.31975		7-ketoDCA%	-0.486398	0.853942		7-ketoDCA%	0	0		7-ketoDCA%	2.67944	5.45108
non12-OH-PBAs/12-OH-PBAs	-0.261477	2.31025										sulfated G-conj BAs%	0	0		non12-OH-SBAs	-0.924175	1.46391		non12-OH-SBAs	2.47581	6.09638		3-ketoCA%	-0.601785	0.668715		3-ketoCA%	0	0		3-ketoCA%	2.11483	5.5049
non12-OH-SBAs/12-OH-SBAs	-1.90609	3.14182										sulfated T-conj BAs%	0	0		non12-OH-BAs/12-OH-BAs	-3.49061	6.67023		non12-OH-BAs/12-OH-BAs	1.91713	3.93467		dehydroLCA%	-0.282032	0.691543		dehydroLCA%	0.393637	2.36921		dehydroLCA%	-1.21355	3.41829
T-conj BAs/G-conj BAs	0.14846	1.41726										PBAs	-0.160047	0.97915		non12-OH-PBAs/12-OH-PBAs	-3.31402	7.60479		non12-OH-PBAs/12-OH-PBAs	2.52801	3.44575		allo-LCA%	1.85912	2.44219		allo-LCA%	2.07898	22.7946		allo-LCA%	-3.83027	10.5085
sulfated G-conj BAs/unsulfated G-conj BAs	-0.529394	2.65303										SBAs	-0.161062	0.981707		non12-OH-SBAs/12-OH-SBAs	-3.82801	4.27622		non12-OH-SBAs/12-OH-SBAs	1.63185	3.4564		iso-LCA%	0.0584737	0.202676		iso-LCA%	0.756758	10.4091		iso-LCA%	-1.48773	5.98987
sulfated T-conj BAs/unsulfated T-conj BAs	-0.260621	1.13169										non12-OH-BAs	-0.0903616	0.532681		T-conj BAs/G-conj BAs	-4.45252	1.78534		T-conj BAs/G-conj BAs	-1.06095	3.17256		6-ketoLCA%	0.142955	0.497008		6-ketoLCA%	-1.63869	7.15624		6-ketoLCA%	-1.53942	3.5328
sulfated unconj BAs/unsulfated BAs	0.924338	4.7866										non12-OH-PBAs	-0.149363	0.793342		CA-3S group/CA group	0.57908	3.2725		CA-3S group/CA group	-1.83831	6.78065		β-HDCA%	-0.209487	0.627998		β-HDCA%	-1.47809	8.8029		β-HDCA%	-1.85725	3.12587
CA-3S group/CA group	-0.0811591	0.267285										non12-OH-SBAs	-0.0742593	0.356927		CDCA-3S group/CDCA group	2.22848	7.56696		CDCA-3S group/CDCA group	0	5.68009		β-UDCA%	-0.979903	3.33327		β-UDCA%	-0.473131	7.44807		β-UDCA%	-1.12733	4.70695
CDCA-3S group/CDCA group	-0.291452	0.844425										non12-OH-BAs/12-OH-BAs	0	0		UDCA-3S group/UDCA group	0.228265	0.679934		UDCA-3S group/UDCA group	-0.131981	0.171427		7,12-diketoLCA%	0.43094	0.735505		7,12-diketoLCA%	0	0		7,12-diketoLCA%	1.89344	8.32249
UDCA-3S group/UDCA group	-0.51813	4.80201										non12-OH-PBAs/12-OH-PBAs	0	0		DCA-3S group/DCA group	2.17207	6.59301		DCA-3S group/DCA group	-1.79764	1.99424		6,7-diketoLCA%	0	0		6,7-diketoLCA%	0	9.05818		6,7-diketoLCA%	0.244034	0.158505
DCA-3S group/DCA group	0.0250439	0.0690792										non12-OH-SBAs/12-OH-SBAs	0	0		LCA-3S group/LCA group	0	0		LCA-3S group/LCA group	0	0		12-ketoCDCA%	0.268115	0.373455		12-ketoCDCA%	0.932905	11.0004		12-ketoCDCA%	-0.0728228	0.341527
LCA-3S group/LCA group	0.0131602	0.0437351										T-conj/G-conj	0	0		sulfated G-conj BAs/unsulfated G-conj BAs	1.22979	2.63347		sulfated G-conj BAs/unsulfated G-conj BAs	-2.73336	1.9975		ω-MCA%	-0.54753	0.792557		ω-MCA%	-0.7612	3.46778		ω-MCA%	-0.679557	2.70767
												CA-3S group/CA group	0	0		sulfated T-conj BAs/unsulfated T-conj BAs	0.0479489	0.100149		sulfated T-conj BAs/unsulfated T-conj BAs	-4.49169	8.08958		T-ω-MCA%	0	0		T-ω-MCA%	0	0		T-ω-MCA%	0.319186	0.287784
												CDCA-3S group/CDCA group	0	0		sulfated unconj BAs/unsulfated BAs	1.58516	8.79021		sulfated unconj BAs/unsulfated BAs	-0.0449533	0.1371		muroCA%	0.382462	0.49717		muroCA%	-1.41868	14.2283		muroCA%	0.163818	0.326045
												UDCA-3S group/UDCA group	0	0										DHCA%	0	0		DHCA%	0	0		DHCA%	-0.911749	1.29817
												DCA-3S group/DCA group	0	0										UCA%	0.344538	0.982854		UCA%	-1.16705	7.76717		UCA%	-1.11803	4.22225
												LCA-3S group/LCA group	0	0										ACA%	0.960785	3.23464		ACA%	0	0		ACA%	0	1.56897
												sulfated G-conj BAs/unsulfated G-conj BAs	0	0										GDHCA%	-1.52873	2.66526		GDHCA%	-2.82795	11.8765		GDHCA%	0.216301	0.63513
												sulfated T-conj BAs/unsulfated T-conj BAs	0	0										TDHCA%	0.359234	0.608943		TDHCA%	0	0		TDHCA%	-1.92605	2.42153
												sulfated unconj BAs/unsulfated BAs	0	0										CA-3S%	0.887669	0.860371		CA-3S%	0	0		CA-3S%	0	0
																								GCA-3S%	-0.9924	2.5747		GCA-3S%	0	0		GCA-3S%	-3.85591	14.1648
																								TCA-3S%	-0.709851	0.646809		TCA-3S%	0	0		TCA-3S%	-1.53358	2.2887
																								CDCA-3S%	-0.302383	0.505127		CDCA-3S%	3.52114	4.95379		CDCA-3S%	0	8.75644
																								GCDCA-3S%	-0.468165	1.03159		GCDCA-3S%	0	0		GCDCA-3S%	0	0
																								TCDCA-3S%	-2.17523	4.47867		TCDCA-3S%	0	22.5384		TCDCA-3S%	0	0
																								UDCA-3S%	-1.61929	2.22169		UDCA-3S%	1.25769	4.24603		UDCA-3S%	0.931374	2.5453
																								GUDCA-3S%	-1.07809	2.86241		GUDCA-3S%	0	0		GUDCA-3S%	0	0
																								TUDCA-3S%	-4.2521	3.50447		TUDCA-3S%	0	0		TUDCA-3S%	0	0
																								LCA-3S%	0.957178	2.24383		LCA-3S%	1.5038	5.52558		LCA-3S%	0	1.56897
																								GLCA-3S%	0.0596414	0.120997		GLCA-3S%	0	0		GLCA-3S%	0	0
																								TLCA-3S%	-0.878767	1.64563		TLCA-3S%	0	0		TLCA-3S%	0	0
																								DCA-3S%	0.54757	1.72658		DCA-3S%	0	0		DCA-3S%	-0.477901	1.45324
																								GDCA-3S%	0.201694	0.325475		GDCA-3S%	0	0		GDCA-3S%	0	0
																								TDCA-3S%	-0.200744	0.276057		TDCA-3S%	0	0		TDCA-3S%	0	1.56897

## Sheet: supplementray Fig 1a-d
supplementary Fig 1a				supplementary Fig 1b				supplementary Fig 1c				supplementary Fig 1d
G-conj BAs	T-conj BAs	unconj BAs		G-conj BAs	T-conj BAs	unconj BAs		G-conj BAs	T-conj BAs	unconj BAs			humans
0.274326	0.403708	0.00281986		0	0.00280908	0.000115247		0	0.000833562	0		CA group	0.0156769	0.0043872	0.0101453	0.00267019	0.00862851	0.00914834	0.0243297	0.00610322	0.0469684	0.00745977	0.0222914	0.0103557	0.0124078	0.00321053	0.00284105	0.00687642	0.0385284	0.0111959	0.0155475	0.00409	0.0223647	0.00472439	0.00586085	0.013486	0.0439243	0.0166284	0.0163788	0.04686	0.0220555	0.0144096	0.0067506	0.00517049	0.0148322	0.00504343	0.0091438	0.00460148	0.00688078
0.17453	0.104897	0.00206286		0	0.00857733	0.000684739		0	0.000445192	0.000516953		CDCA group	163.43	38.3354	123.897	75.2098	22.427	51.6778	118.557	48.6717	81.0976	73.8686	0	47.1467	40.4921	20.2257	160.738	23.5813	69.3755	40.4722	102.32	42.3761	173.678	37.3588	41.5297	58.4042	30.1229	59.9455	60.7035	97.6819	69.6838	126.926	46.789	39.1029	94.902	21.4196	44.629	37.3357	300.255
0.732181	0.767793	0.00723537		0.00037004	0.00700465	0.00034632		0	0.00119063	0		UDCA group	8.55369	9.25352	3.08525	47.1647	14.4742	6.20736	17.2011	9.30431	2.91048	5.79015	3.28158	12.1643	11.4155	10.5012	28.5097	3.60325	9.0762	5.24569	4.16973	13.0581	50.6627	19.3289	1.71034	8.50775	15.6494	12.4815	6.82865	7.46361	37.7834	45.1403	10.6983	12.7931	13.4023	18.8179	1.87004	9.22727	6.20451
0.0640602	0.163405	0.00157154		0.000325206	0.00699993	0.000288483		0	0.00131926	0		DCA group	47.0668	111.102	48.6932	5.0394	14.3434	144.422	148.763	32.4822	80.7339	76.6895	65.6248	23.647	1.55325	13.2282	49.1373	22.8585	87.9691	97.7653	81.5458	58.337	285.42	21.7757	772.506	55.2829	38.6546	73.7718	24.3512	12.9198	49.0721	47.6991	66.6642	14.8013	78.6548	14.3901	139.292	38.995	48.8276
0.508144	0.761283	0.0124029		0.000570751	0.00783255	0.000388467		0	0	0		LCA group	391.588	775.736	166.411	334.745	1604.65	255.978	832.277	244.314	465.856	293.343	554.452	290.025	6.9148	634.431	136.149	36.6555	196.773	44.4694	1003.22	65.3028	370.515	127.718	578.47	241.367	1714.83	830.667	568.146	167.076	13.4815	310.445	2888.19	671.714	2467.97	430.485	261.158	300.473	1219.92
0.679992	0.573334	0.0164429		0.00180286	0.0114795	0.000152699		0	0.000685619	0
0.796714	0.697142	0.0324801		0.00127005	0.00704727	0.000254909		0	0.000611922	0
0.220349	0.258861	0.0162934		0	0.00333192	0.000314982		0	0.00759912	0
3.12187	2.1658	0.0228346		0	0.00241108	0.000527379		0	0.0239027	0
0.700043	0.50832	0.015777		0	0.00250906	0.000599103		0	0.0158835	0
0.842468	1.19626	0.014738		0	0.00413353	0.000406701		0	0.01119	0
0.963299	0.993684	0.0112766		0	0.00308018	0.000371109		0	0.0156061	0
0.398969	0.457097	0.0112521		0	0.00388638	0.000273608		0	0.0151863	0
0.202882	0.169267	0.0172928		0	0.00269531	0.000469436		0	0.0146139	0
0.258924	0.415148	0.0425928
0.609579	0.834453	0.0505248
2.271	3.3289	0.107651
0.367494	0.292481	0.0163468
0.554243	1.28657	0.0556314
0.30606	0.168579	0.0102477
1.40465	1.97267	0.0134269
0.702526	1.1599	0.0721687
0.2278	0.123809	0.0149015
0.286139	0.142387	0.00315287
0.685853	0.637482	0.00249903
1.81965	1.93889	0.0186479
1.2956	2.00623	0.0110101
4.25843	2.70129	0.0121172
1.6119	2.13719	0.00861
0.310623	0.169162	0.0021239
0.927857	1.00493	0.0209903
0.651542	0.395895	0.00291814
0.423062	0.172924	0.00371775
0.224719	0.126691	0.00238072
0.270088	0.224293	0.00224417
0.207742	0.130219	0.00498484
0.677805	0.682663	0.0240057
0.872767	0.833178	0.0238657
1.2253	1.07155	0.0265925
0.568046	0.581834	0.00770803
0.824164	1.07475	0.013591
0.688606	0.484939	0.00903489
0.990961	1.34713	0.0226152
0.587283	0.378169	0.0185688
1.62399	1.23128	0.0175879
0.74833	0.742817	0.00897963
1.29202	1.04306	0.00961857
0.90103	0.810889	0.0195642
0.620753	0.781496	0.0194388
1.75434	1.87937	0.0126013
[truncated: 41 more columns]

## Sheet: supplementary Fig 1e-j
supplementary Fig 1e						supplementary Fig 1f						supplementary Fig 1g						supplementary Fig 1h						supplementary Fig 1i						supplementary Fig 1j
CA group	CDCA group	UDCA group	DCA group	LCA group		CA group	CDCA group	UDCA group	DCA group	LCA group		CA group	CDCA group	UDCA group	DCA group	LCA group		CA group	CDCA group	UDCA group	DCA group	LCA group		CA group	CDCA group	UDCA group	DCA group	LCA group		CA group	CDCA group	UDCA group	DCA group	LCA group
0.0707079	163.43	8.55369	47.0668	391.588		0.0781571	2.84279	0.117618	2.85654	0		0.352052	0.00146034	0.354535	0.0434039	0		0.0156769	0.123423	0.292228	0.176863	13.3104		0	0.00691158	0.0201139	0	0.448391		0.00351871	0	0	0	0.0717534
0.186668	38.3354	9.25352	111.102	775.736		0.055847	4.34191	0.249862	4.60617	#DIV/0!		0.110632	0.00152866	0.0802197	0.150222	0		0.0043872	0.0906206	0.202406	0.0993643	13.6804		0	0.0215126	0.0776484	0.0499416	0.421084		0.00185414	0	0.0100027	0	0
0.0156489	123.897	3.08525	48.6932	166.411		0.0931541	2.59624	0.18744	8.48477	0		0.341686	0.00229902	0.248871	0.0769549	0		0.0101453	0.174648	0.261319	0.353403	16.3448		0.000319889	0.00964329	0.0202173	0.0531739	0.310592		0.00263849	0	0	0	0
0.0807738	75.2098	47.1647	5.0394	334.745		0.0384945	3.70325	0.0471688	3.70215	#DIV/0!		0.0843702	0.00146979	0.0716959	0.198756	0		0.00267019	0.0650384	0.0855482	0.111985	11.1619		0.00055191	0.00620849	0.0115615	0.0609012	0.604949		0.00271359	0	0	0	0.0846197
0.0285845	22.427	14.4742	14.3434	1604.65		0.10322	1.37524	0.105104	0.274087	0		0.0980683	0	0.978975	0	0		0.00862851	0.0690085	0.105451	0.294153	10.3316		0.00028673	0.00964384	0.0131868	0.0365992	0.253955		0	0	0	0	0
0.129058	51.6778	6.20736	144.422	255.978		0.0625844	1.47868	0.16924	3.86658	0		0.0535053	0	0.06173	0.0591305	0		0.00914834	0.263348	0.413518	0.436338	16.9662		0	0.00436736	0.00703574	0.0163597	0.0953115		0.00177097	0	0	0	0.068801
0.449906	118.557	17.2011	148.763	832.277		0.069034	3.39658	0.107453	4.69605	0		0.0658004	0	0.0441118	0.203267	0		0.0243297	0.234838	0.73237	0.82004	27.3565		0.000317493	0.00855474	0.012472	0.0371764	0.35988		0.00252178	0	0	0	0
0.0164305	48.6717	9.30431	32.4822	244.314		0.0946589	0	0.295872	0.0414487	0		0.139122	0	0.117806	1.60976	0		0	0.0637041	0.222906	0.122499	30.4895		0	0.00402727	0.0168999	0.0109466	0.377149		0.0184809	0	0	0	0.134616
0.0924411	81.0976	2.91048	80.7339	465.856		0.0223424	0.0417131	0.0407449	0.00671442	0		0.417194	0	0.575176	0	0		0.0337112	1.58822	0.146431	1.35581	48.1078		0.000122131	0.0023048	0.0299181	0.0117189	0.313069		0.0806687	0	0	0.00638309	0
0.446895	73.8686	5.79015	76.6895	293.343		0.00694102	0.0508418	0.0406306	1.04702	0		0.9855	0	0.113959	0.0278912	0		0.00745977	0.172405	0.309529	0.349588	29.0358		0.000201391	0.00245734	0.0274213	0.0171686	0.243894		0.0582892	0	0	0.00329037	0.175722
0.0103477	#DIV/0!	3.28158	65.6248	554.452		0.0517027	3.56834	0.11991	1.98952	0		0.937897	0	0.161724	0.150217	#DIV/0!		0.0118833	0.171351	0.167662	0.236055	13.8954		0.000294338	0.00244818	0.0220336	0.0058927	0.196121		0.030964	0	0	0.00275138	0.101759
0.0431831	47.1467	12.1643	23.647	290.025		0.0517027	0.55017	0.11991	3.18168	0		0.282143	0	0	0.207485	0		0.0103557	0.245641	0.260515	0.431379	11.6367		0.000186071	0.001987	0.0186975	0.0101635	0.246959		0.0555102	0	0	0	0
0.315612	40.4921	11.4155	1.55325	6.9148		0.052739	0	0.116623	0.0325306	0		0.692421	0	0.880738	0.354591	0		0	0.0947232	0.155599	0.187207	5.55844		0.000192749	0.0013616	0.0086923	0.00728161	0.259799		0.0451033	0	0	0.00305293	0.144313
0.0437424	20.2257	10.5012	13.2282	634.431		0.0549368	0	0.106213	0.0219873	0		0.501089	0	0.167015	0.193941	0		0.00321053	0.0852012	0.240932	0.0852566	8.44156		0.000189756	0.00248875	0.0159539	0.00901945	0.177767		0.0434645	0	0	0.00291005	0.148631
0.0530911	160.738	28.5097	49.1373	136.149														0	0.0491176	0.0901612	0.0925286	13.0092
0.071946	23.5813	3.60325	22.8585	36.6555														0.00687642	0.125234	0.147186	0.217333	12.4697
0.206529	69.3755	9.0762	87.9691	196.773														0.0385284	0.495555	0.716903	1.93343	99.1555
0.128349	40.4722	5.24569	97.7653	44.4694														0.00620562	0.0855275	0.201324	0.197521	13.2792
0.209335	102.32	4.16973	81.5458	1003.22														0.0155475	0.218018	0.267387	0.465645	20.055
0.11627	42.3761	13.0581	58.337	65.3028														0.00409	0.108643	0.191874	0.217715	18.3252
1.31933	173.678	50.6627	285.42	370.515														0.0124552	0.383705	0.286737	0.490864	17.7926
0.0692734	37.3588	19.3289	21.7757	127.718														0.00227408	0.0698092	0.195789	0.223965	19.5178
1.10911	41.5297	1.71034	772.506	578.47														0.00419565	0.0826913	0.180458	0.192345	8.62908
0.142922	58.4042	8.50775	55.2829	241.367														0.013486	0.179076	0.516941	0.0376083	2.67241
0.0475211	30.1229	15.6494	38.6546	1714.83														0.0260035	0.226676	0.685776	0.312523	5.12136
0.176768	59.9455	12.4815	73.7718	830.667														0.0166284	0.632942	0.534484	0.668613	65.6728
0.0310009	60.7035	6.82865	24.3512	568.146														0.0163788	0.403595	0.579108	0.558764	42.4932
0.142549	97.6819	7.46361	12.9198	167.076														0.04686	1.42556	1.0454	1.8529	38.7512
0.0849915	69.6838	37.7834	49.0721	13.4815														0	0.466282	0.287616	0.784091	27.2079
0.242081	126.926	45.1403	47.6991	310.445														0.0144096	0.0661032	0.370737	0.159313	6.56043
0.134997	46.789	10.6983	66.6642	2888.19														0.00463326	0.19585	0.498193	0.298685	20.6925
0.0350099	39.1029	12.7931	14.8013	671.714														0.00346564	0.198334	0.348247	0.357061	13.4209
0.204583	94.902	13.4023	78.6548	2467.97														0.0148322	0.208427	0.561411	0.0386732	0
0.0318194	21.4196	18.8179	14.3901	430.485														0.00297139	0.114636	0.199174	0.169857	0
#DIV/0!	44.629	1.87004	139.292	261.158														0.00521967	0.109229	0.151567	0.128632	5.24617
0.0387251	37.3357	9.22727	38.995	300.473														0.00292731	0.0696884	0.37634	0.134677	10.382
0.445579	300.255	6.20451	48.8276	1219.92														0.00571852	0.112183	0.247512	0.327601	26.4063
0.243396	63.4895	7.56892	79.5023	1518.28														0.0136773	0.0990939	0.209952	0.33153	24.3131
0.377437	193.386	3.14532	97.0691	211.172														0.0045589	0.18935	0.376825	0.332615	17.0139
0.271581	80.212	17.62	10.3742	983.187														0.00541045	0.143853	0.15403	0.275811	15.0558
0.337465	58.1299	9.1126	58.8997	963.544														0.0106238	0.355991	0.594542	0.00842723	12.2928
0.828396	181.698	17.4473	190.449	4562.78														0.00952065	0.311956	0.532313	0.370424	16.8156
0.461293	86.0978	4.47012	95.5346	1429.72														0.00634962	0.140323	0.239448	0.281464	28.1802
0.123522	33.77	23.7529	12.4749	49.8438														0.00937075	0.19063	0.35764	0.374285	22.6053
0.359115	105.37	48.769	89.34	302.61														0.00817298	0.181919	0.308173	0.276495	31.4124
0.604679	88.9937	68.3329	35.1407	106.812														0.00882117	0.166841	0.306141	0.253463	11.3583
0.671514	83.2523	14.0061	157.223	11.5375														0.018502	0.144138	0.190319	0.289786	16.5392
0.115743	69.1716	31.7679	0	7.83868														0.00495692	0.193304	0.234385	0.279476	6.13542
0.0620358	45.0928	8.30389	127.111	94.6471														0.00476925	0.158075	0.28663	0.28476	18.4693
0.046356	15.593	8.15383	27.2288	321.212														0.0162979	0.441931	0.239555	0.569524	34.4448

## Sheet: supplementary Fig 2
humans	rats	mice
0.0330481	0.149674	0.149674
0.0071988	0.285009	0.285009
0.0449301	0.295375	0.295375
0.0457306	0.508842	0.508842
0.226494	0.279309	0.279309
0.0273125	0.264846	0.264846
0.0353055	0.295684	0.295684
0.0412656	0.435431	0.435431
0.0358828	0.57546	0.57546
0.199144	0.257141	0.257141
0.0965498	0.241165	0.241165
0.162504	0.367364	0.367364
0.0694645	0.590209	0.590209
0.145314	0.396375	0.396375
0.0840199
0.0615271
0.071692
0.0902681
0.0810019
0.0533017
0.023979
0.0335162
0.0590273
0.163584
0
0
0.0146379
0.0690152
0.162947
0.0252027
0.0157707
0.101282
1.00221
0.39704
0.0345616
0.0142399
0.509825
0.0159524
0.066806
0.0914336
0.151349
0.0791631
0.41872
0.0396121
0.116621
0.237364
0.0479447
0.1642
0.0999195
0.0400541
